# 1 A pathogenic fungus uses volatiles to entice male 2 flies into fatal matings with infected female 3 cadavers

## 4 5 **Authors**

6 Andreas Naundrup<sup>\*1</sup>, Björn Bohman<sup>2</sup>, Charles A. Kwadha<sup>2</sup>, Annette B. Jensen<sup>1</sup>, Paul G. Becher<sup>2</sup>,  
7 Henrik H. De Fine Licht<sup>\*1</sup>

8 <sup>1</sup>Section for Organismal Biology, Department of Plant and Environmental Science, University of  
9 Copenhagen, Denmark

10 <sup>2</sup>Department of Plant Protection Biology, Swedish University of Agricultural Sciences, Alnarp,  
11 Sweden

12 \*Authors for correspondence: Email: ah@plen.ku.dk, Tel: +45 42408353, Email:  
13 hhdefinlicht@plen.ku.dk, Tel: +45 35320097, Address: Section for Organismal Biology,  
14 Department of Plant and Environmental Science, University of Copenhagen, Thorvaldsensvej 40,  
15 1871 Frederiksberg, Denmark

## 16 17 **Abstract**

18 To ensure dispersal, many parasites and pathogens behaviourally manipulate infected hosts. Other  
19 pathogens and certain insect-pollinated flowers use sexual mimicry and release deceptive mating  
20 signals. However, it is unusual for pathogens to rely on both behavioural host manipulation and  
21 sexual mimicry. Here, we show that the host-specific and behaviourally manipulating pathogenic  
22 fungus, *Entomophthora muscae*, generates a chemical blend of volatile sesquiterpenes and alters the  
23 level of natural host cuticular hydrocarbons in dead infected female house fly (*Musca domestica*)  
24 cadavers. Healthy male house flies respond to the fungal compounds and are enticed into mating  
25 with dead female cadavers. This is advantageous for the fungus as close proximity between host  
26 individuals leads to an increased probability of infection. The fungus-emitted volatiles thus  
27 represent the evolution of an extended phenotypic trait that exploit male flies' willingness to mate  
28 and benefit the fungus by altering the behavioural phenotype of uninfected healthy male host flies.

## 29 **Main**

30 The evolution of specific mate recognition systems is often central for successful sexual  
31 reproduction (Ryan and Rand, 1993). Once males and females have located each other, individual  
32 mating preferences or competition for access to mates may lead to suboptimal decisions during  
33 courtship and mating (Trivers, 1972; Andersson, 1994). The willingness to mate is for example  
34 exploited by certain insect pollinated flowers (Schiestl *et al.*, 2000; Cohen *et al.*, 2021; Hayashi *et*  
35 *al.*, 2021), which use sexual mimicry to attract pollinators by resembling the opposite sex visually  
36 and/or chemically. Exploitation of mate recognition systems can be highly advantageous for  
37 obligate pathogens as it increases the chance of pathogen transmission by ensuring contact with new  
38 potential hosts of the right species (Hansen and De Fine Licht, 2019).

39 Obligate parasites and pathogens are under strong selection pressure to find a host to continue or  
40 complete their life-cycle (Schmid-Hempel, 2011). This has led to the convergent evolution of  
41 behavioural manipulation across parasitic phyla that increases transmission to new hosts (Helluy  
42 and Thomas, 2003; Hoover *et al.*, 2011; Adamo, 2013; de Bekker *et al.*, 2015; Ros *et al.*, 2015;  
43 Botnevik *et al.*, 2016; Małagocka, Jensen and Eilenberg, 2017). Pathogens may also behaviourally  
44 manipulate their hosts without residing inside the body of the host (Hughes and Libersat, 2018), for  
45 example through host-consumption of pathogen secreted substances (Hojo, Pierce and Tsuji, 2015)  
46 or via direct injection of chemical cocktails by certain parasitoids (Gal and Libersat, 2010). A  
47 widespread, but more subtle behavioural manipulation is attraction of potential new hosts or vectors  
48 with volatile compounds by certain entomopathogenic bacteria (Keeseey *et al.*, 2017), nematodes  
49 (Zhang *et al.*, 2019), fungi (George *et al.*, 2013; Trandem *et al.*, 2015), beetle-tapeworms (Evans *et*  
50 *al.*, 1998; Shostak and Smyth, 1998; Shea, 2007), and plant viruses (Mauck, De Moraes and  
51 Mescher, 2010). Such attraction is driven by the extended phenotype of pathogens in the infected  
52 host (Dawkins, 1982; Hoover *et al.*, 2011), where expression of pathogen genes ultimately leads to  
53 the altered behaviour of uninfected hosts from a distance. Although the proximate mechanism is in  
54 many cases still largely elusive (van Houte, Ros and van Oers, 2013; Hughes and Libersat, 2018; de  
55 Bekker, Beckerson and Elya, 2021), a combination of pathogenic traits governing the extended  
56 phenotype and the exploitation of host compensatory responses to pathogen infection is thought to  
57 control altered host behaviour (Lefèvre *et al.*, 2009).

58 The entomopathogenic fungus, *Entomophthora muscae*, represents a unique example in that it not  
59 only behaviourally manipulates its immediate house fly (*Musca domestica*) host, but also appears to

60 manipulate uninfected conspecifics. Prior to death, infected house flies are manipulated to seek out  
61 elevated positions and die with wings spread out in a specific posture conducive for active  
62 discharge of infectious fungal conidia, which occurs primarily within the first 24 hours post mortem  
63 (De Ruiter *et al.*, 2019; Lovett *et al.*, 2020). Male and female flies in the vicinity may become  
64 infected from being directly hit by a conidium (spore) or via contact with already-discharged  
65 conidia that form a halo on the surface surrounding a conidia-shooting cadaver (De Ruiter *et al.*,  
66 2019).

67 Remarkably, the behavioural manipulation by *E. muscae* continues after death of female hosts, as  
68 the fungus appears to use sexual mimicry to lure healthy males to attempt mating with these  
69 cadavers (Møller, 1993), even though they are only rewarded with deadly fungal conidia for their  
70 efforts (Fig. 1A). In house flies, courtship starts with the male jumping on top of the female in a so-  
71 called “mating strike” and placing his legs at the base of the wings of the female, which in turn  
72 instantly spreads her wings horizontally from the body resembling flight position (Murvosh, Fye  
73 and LaBrecque, 1964; Tobin and Stoffolano, 1973). Both males and females are considered as  
74 choosing sex in house flies because males vary considerably in their mating efforts and females can  
75 exert mating choice by kicking off courting males (Goulson *et al.*, 1999). Although house fly males  
76 are able to distinguish between male and female cadavers covered in infectious *E. muscae* conidia  
77 (Zurek *et al.*, 2002), males do not discriminate the fungus-swollen female cadavers and appear to  
78 readily initiate courtship and mating strikes (Møller, 1993).

79 We sought to understand the mechanisms governing this maladaptive behaviour, and test the  
80 hypothesis that an extended phenotype of *E. muscae* lures male flies by changing the chemistry of  
81 infected female cadavers. Specifically, we examined two fungal attraction pathways: 1) *E. muscae*  
82 amplifies the signal of female house fly pheromones, which creates a sensory bias so males respond  
83 to a quantitatively improved supernormal stimuli (amplified chemical attraction), or 2) *E. muscae*  
84 synthesizes new chemical cues not normally occurring in female house flies so males respond to a  
85 qualitatively improved mating signal (novel chemical attraction). Mate recognition in house flies is  
86 normally governed by both visual and chemical cues (Rogoff *et al.*, 1964; Adams and Holt, 1987),  
87 and sex pheromones consist of sex-specific blends of cuticular hydrocarbons (CHC) that line the  
88 outer cuticle (Carlson *et al.*, 1971; Adams, Nelson and Fatland, 1995; Noorman and Otter, 2001).  
89 Most CHCs are only perceived at close range (Blomquist, Tittiger and Jurenka, 2020), however,  
90 chemical derivatization can increase volatility and result in attraction over longer distances as  
91 shown in fruit fly (*Drosophila melanogaster*) pheromones (Lebreton *et al.*, 2017).

92 We evaluated the potential amplified or novel chemical attraction pathways in three steps. First, we  
93 quantified male sexual attraction to fungus-killed cadavers and fungal conidia using behavioural  
94 assays. Second, we identified the chemical cues eliciting male mating attraction using chemical  
95 analyses (GC-MS) and physiological mechanisms enabling males to detect these cues using  
96 electroantennography (GC-EAD). Third, we verified the fungus *E. muscae* as source of the  
97 behaviourally active volatile compounds in fungus-killed cadavers using transcriptional profiling  
98 (RNAseq) of expressed genes in volatile chemical biosynthesis pathways.

99

## 100 **Results**

101 **Male houseflies attempt mating with fungus-killed cadavers and are attracted to *E. muscae***  
102 **conidia.** We first performed mating activity experiments to verify increased male mating attempts  
103 towards *E. muscae*-killed female cadavers (Møller, 1993; Zurek *et al.*, 2002) (Fig. 1A, suppl. Fig. 1,  
104 2). Males neither spent more time in the vicinity of, nor physically touched fungus-killed cadavers  
105 more often than control cadavers (Suppl. Fig. 3). This was irrespective of whether the cadavers were  
106 in early (3-8 hours post mortem) or late (26-28 hours post mortem) sporulation stages (Suppl. Fig.  
107 3). However, male mating attempts increased as the cadavers proceeded to the late stage of  
108 sporulation and were not surrounded by a halo of infective conidia (Kruskal-Wallis (K-W),  $\chi^2 =$   
109 14.095,  $p = 0.0008695$ , Fig. 1B). This increase in sexual attraction appeared sex-specific; males  
110 mated more frequently only with female cadavers (Suppl. Fig. 3, 4), confirming previous  
111 observations (Zurek *et al.*, 2002). Interestingly, when we allowed a male to choose between a  
112 control and infected female cadaver present together in a small arena, we did not see a significant  
113 difference between infected and uninfected cadavers in the number of mating attempts (Suppl. Fig.  
114 5). However, a significantly higher number of total mating attempts to either of the two cadavers in  
115 the arena was observed if just one of the two cadavers was in the late stage of sporulation (K-W  $\chi^2 =$   
116 15.007,  $p = 0.0005512$ , Fig. 1C), which indicates that although the male did not discriminate  
117 between infected or uninfected female cadavers, the presence of mating cues in late-stage  
118 sporulating female cadavers stimulate male sexual behaviour. To confirm that manipulation of male  
119 sexual behaviour is an effective means of increasing fungal transmission, the male subjects were  
120 incubated for 10 days, which showed that 73% become infected after exposure to late sporulation  
121 cadavers compared to 15% of males exposed to early sporulation cadavers (Suppl. Data 1).  
122 Increased cadaver mating attempts correlated with fungal infection as more male flies became



123 infected when exposed to a late sporulation stage female cadaver compared to a late sporulation  
124 stage male cadaver (Suppl. Data 1).

125 During our behavioural studies, we occasionally observed males being attracted to conidia and  
126 approach these on artificial surfaces even in the absence of a cadaver. Here, the males would extend  
127 their proboscis and taste *E. muscae* conidia (Suppl. Figure 1). To investigate whether conidia alone  
128 were sufficient for attraction, flies were allowed to choose between two visually obstructed sticky  
129 traps inside a cage (Fig 2E). One trap contained *E. muscae* conidia from three all-male or all-female  
130 cadavers and the other was a control trap without conidia (exposed to uninfected cadavers). Both  
131 male and female flies were caught most often in traps with *E. muscae* conidia (logistic regression,  $n$   
132 = 117,  $Z = 3.519$ ,  $p = 0.000433$ , Fig. 2F), regardless of the sex of the conidia-discharging cadavers.  
133 As the traps were visually obstructed, we hypothesized that the attraction towards conidia was  
134 volatile-mediated and we therefore used electroantennography (EAG) to measure the male house fly  
135 antennal response to volatile compounds surrounding living flies, uninfected cadavers, sporulating  
136 cadavers, or conidia (headspace sampling) (Fig. 2A,D). Male house flies showed significantly  
137 higher antennal responses to conidial headspace (Linear mixed effects model (LMM),  $t = 15.728$ ,  $p$   
138 < 0.0001, Fig. 2D), and *E. muscae* sporulating cadaver headspace compared to headspace from  
139 either live (LMM,  $t = 3.573$ ,  $p = 0.0112$ , Fig. 2A) or dead control flies (LMM,  $t = 3.914$ ,  $p =$   
140 0.0082, Fig. 2A, Suppl. Fig. 6) of equal age and sex. The antennal responses were even higher when  
141 *E. muscae* and control cadavers were in a late sporulation stage (LMM,  $t = 2.646$ ,  $p = 0.0267$ , Fig.  
142 2A). Furthermore, the complete cadaver headspace samples were attractive to male house flies in Y-  
143 tube behavioural assays at a significance level of 0.1 (exact binomial test,  $p = 0.07255$ , Fig. 2B, C),  
144 which supports the EAG results that male house flies are able to detect volatiles from *E. muscae*  
145 infected cadavers.

146 ***E. muscae* killed house fly cadavers have distinct chemical profiles of volatiles and cuticular**  
147 **hydrocarbons.** To investigate the chemical compounds responsible for the male housefly antennal  
148 responses to conidia and sporulating cadavers, we used gas chromatography coupled to mass  
149 spectrometry (GC-MS) to analyse cuticular extracts (in hexane) of both infected and uninfected  
150 houseflies in early (3-8 hours post mortem) and late (26-28 hours post mortem) sporulation stages,  
151 equivalent to the cadavers used in the behavioural assays (Suppl. Fig. 7, 9). We observed distinct  
152 differences in the chemical profiles (Fig. 3A), which using principal component analysis (PCA)  
153 clustered according to infection status (early vs. late) and housefly sex (Fig. 3B). Distinctive  
154 compounds in cadavers sporulating with *E. muscae* compared to control fly cadavers consisted of

155 various long-chained alcohols and esters (Fig. 3A). Many of these compounds, including canonical  
156 house fly cuticular hydrocarbons, increased from early-stage to late-stage sporulation, although the  
157 housefly host was dead throughout all sporulation stages (Fig. 3A, Suppl. Data 2).

158 The alkene (Z)-9-tricosene has been proposed to be the primary female house fly sex pheromone  
159 (Carlson *et al.*, 1971), although other findings report that several house fly strains contain no (Z)-9-  
160 tricosene (Noorman and Otter, 2001; Darbro *et al.*, 2005; Butler *et al.*, 2009). We only found trace  
161 amounts of a compound with matching GC-MS properties to (Z)-9-tricosene in late sporulating  
162 males and females, and no traces in uninfected females (Fig. 3A). There was an increase in late  
163 sporulating cadavers, however, in the amounts of compounds tentatively identified as methyl-  
164 branched alkanes, most likely 2-methyloctacosane, 2- and 4-methyltriacontane and 11- and 13-  
165 methylheptatriacontane (Fig. 3A), which have previously been found to stimulate male sexual  
166 behaviour (Adams and Holt, 1987; Adams, Nelson and Fatland, 1995). The compounds 2-  
167 methyloctacosane and an unknown methyl-branched heptatriacontane have both been shown to  
168 yield small non-significant increases in mating attempts (Adams, Nelson and Fatland, 1995), while  
169 2-, 3- and 4-methyltriacontane have previously been found to significantly increase male mating  
170 attempts (Adams, Nelson and Fatland, 1995). Altogether, these previous findings support that  
171 higher amounts of female house fly cuticular compounds increase male sexual behaviour towards  
172 female *E. muscae*-infected cadavers.

173 While cuticular hydrocarbons comprise the house fly sex pheromone and likely act on shorter  
174 ranges, an aerial plume of volatile compounds from the cadavers would mediate medium to long-  
175 range chemical attraction of flies to cadavers and conidia. We therefore analysed volatile  
176 compounds emitted to the surrounding air (headspace sampling) of infected and uninfected male  
177 and female fungal cadavers (Suppl. Fig. 8, 10). Infected fly cadavers had markedly different volatile  
178 profiles than uninfected control cadavers of similar age (Fig. 4A, Suppl. Data 3), while headspace  
179 from infected male and female cadavers were largely similar. Twenty-four compounds, dominated  
180 by sesquiterpenes and including an ethyl ester, ethyl octanoate, were repeatedly found in headspace  
181 from infected males and females (Fig. 4A). Interestingly, the largest single component of any *E.*  
182 *muscae* headspace sample, sesquiterpene 3 (Supp. Fig. 12), was also found in headspace samples of  
183 uninfected females (Suppl. Fig. 8), but not males (Suppl. Fig. 10).

184 Having determined that infected fly cadavers have distinct cuticular- and headspace chemical  
185 profiles, and that fly antennae elicit stronger responses to the odour of infected cadavers, we next

186 sought to determine which compounds trigger an electrophysiological antennal response using gas  
187 chromatography-coupled electrophysiological recordings from antennae (GC-EAD, Suppl. Fig. 16).  
188 None of the long-chain hydrocarbons elicited consistent GC-EAD antennal responses, whereas  
189 ethyl octanoate (verified using synthetic standard), two putative sesquiterpenes and two compounds  
190 with unknown structure repeatedly elicited GC-EAD-responses (Fig. 4B, Suppl. Fig. 11, 13-15).  
191 Irrespective of dosage tested (20-2000 ng), ethyl octanoate did not elicit any behavioural response  
192 from male house flies when tested alone as a synthetic standard in Y-tube assays (exact binomial  
193 tests,  $p > 0.1$  in all cases), indicating that ethyl octanoate alone is insufficient to trigger behavioural  
194 attraction.

195 **All *E. muscae* genes in the mevalonate sesquiterpene biosynthesis pathway are actively**  
196 **expressed in fungus-killed cadavers.** Having shown that multiple volatiles from female *E. muscae*  
197 fly cadavers are detected by fly antenna and in combination are attractive to male flies, we sought to  
198 determine if the pathogenic fungus synthesizes these compounds for behavioural manipulation  
199 (novel chemical attraction) or whether the male attraction is due to naturally occurring volatile  
200 chemistry in the decaying fly cadaver, for example via post-mortem house fly gene expression.  
201 Genome-wide gene expression of early (4 hours post death) and late (28 hours post death) infected  
202 and uninfected control fly cadavers, respectively, were therefore analysed for key chemical  
203 synthesis pathways (Fig. 5A). This revealed that *E. muscae* actively expressed, and in late vs early  
204 cadavers had statistically significant higher expression of several key enzymes, which are generally  
205 known to catalyse the production of precursors for characteristic bioactive esters and fatty acids  
206 (e.g., acetyl-coA carboxylase (ACC1), fatty acid synthases (FAS1, FAS2), and long-chain-fatty-  
207 acid-CoA ligase 2 (ACSL) (Eder *et al.*, 2018) (Suppl. Data 4). Furthermore, in both early and late  
208 fly cadavers, *E. muscae* expressed all seven enzymes in the mevalonate pathway that synthesise the  
209 backbone isoprenoid precursors (Vranová, Coman and Gruissem, 2013) and a farnesyl-diphosphate  
210 farnesyltransferase (FDFT), required for further sesquiterpenoid and triterpenoid biosynthesis (Fig.  
211 5B, Suppl. Data 5). Finally, we were able to identify three expressed fungal transcripts, one of  
212 which was up-regulated in 28 hour old cadavers compared to early cadavers. These transcripts  
213 showed significant homology to the yeast *Saccharomyces cerevisiae* ethyl ester biosynthesis genes  
214 *eht1* and *eeb1* (Suppl. Data 6), which are specifically involved in ethyl octanoate biosynthesis  
215 (Saerens *et al.*, 2006, 2008). The expression profile of these *E. muscae* genes, in combination with a  
216 significantly lower post-mortem expression of *M. domestica* alkene biosynthesis genes in 28 hour  
217 old cadavers (Suppl. Data 7), is in concordance with *E. muscae* being solely responsible for the

218 biosynthesis and release of the identified ethyl octanoate and sesquiterpene volatiles. Taken  
219 together this supports a novel chemical attraction of male house flies, which respond to a  
220 qualitatively improved signal from fungus-killed cadavers.

221

## 222 **Discussion**

223 Any obligate and host-specialized pathogen is in dire need of transmission to a new host. The  
224 insect-pathogenic fungus *E. muscae* represents a novel instance of volatile-mediated pathogen  
225 manipulation of host-mating behaviour (George *et al.*, 2013; Trandem *et al.*, 2015; Cooley,  
226 Marshall and Hill, 2018), where changes in volatile chemistry can be directly linked to changes in  
227 host sexual behaviour. Healthy males are attracted to fungus-killed cadavers and engage in  
228 courtship and mating attempts, which significantly increase infection of new host individuals and  
229 thereby ensures transmission of the fungal pathogen. The male attraction to *E. muscae* infected  
230 female cadavers cannot be explained by changes in the amount of the canonical main house fly sex  
231 pheromone (Z)-9-tricosene, or solely by visual cues from the altered size and appearance of the  
232 cadaver (Møller, 1993; Zurek *et al.*, 2002). Here we show that infection with *E. muscae* induces  
233 changes in the volatile chemistry that attract house flies by both altering the levels of cuticular fly  
234 hydrocarbons and by producing several unusual volatile compounds, including several  
235 sesquiterpenes not previously associated with house flies. Sesquiterpenes have recently been found  
236 to be attractive in several other insects. For example, it has been reported that  $\beta$ -caryophyllene and  
237  $\beta$ -elemene are attractive to *Apis cerana* (Zhang, 2018), while  $\beta$ -trans-bergamotene is believed to  
238 have an attractant effect on bumble bees (Haber *et al.*, 2019). Terpenoids, including sesquiterpenes,  
239 are otherwise well known anti-feedants and antimicrobials (Mithöfer and Boland, 2012). For  
240 example,  $\beta$ -selinene is a known antifungal compound in the roots of maize, and also induced by  
241 jasmonic acid in celery (Stanjek *et al.*, 1997; Ding *et al.*, 2017). Generally, sesquiterpenes are not  
242 sufficiently acknowledged in the literature, most likely due to difficulties with structurally  
243 elucidating these compounds by GC-MS alone, as the mass spectra lack diagnostic peaks  
244 differentiating the many alternative structural backbones and isomers. In fact, alternative  
245 complementary approaches, such as in vivo labelling and detailed biosynthetic considerations  
246 (Könen and Wüst, 2019) or NMR-studies, requiring pure samples of >1000-fold more compound  
247 than GC-MS, are often required for the full identification of novel sesquiterpenes.

248 Whereas female house flies normally avoid oviposition on animal faeces colonized by harmful  
249 fungi (Lam *et al.*, 2010), the volatiles found in the air surrounding *E. muscae* killed cadavers and  
250 fungal conidia were attractive to the flies. It is plausible that the volatile compounds attract male  
251 flies from a distance, but when males are within closer proximity of the cadaver they respond to the  
252 altered levels in less volatile cuticular compounds. Among the compounds that increased in fungus-  
253 killed cadavers compared to uninfected controls are specific methyl-branched alkanes similar to  
254 those known to elicit male sexual and courtship behaviours (Suppl. Fig. 17). Although the mating  
255 attempts are of shorter duration than natural matings, which normally last for more than 60 minutes  
256 (Murvosh, Fye and LaBrecque, 1964), the close physical and mechanical contact with the cadaver  
257 can trigger the active release of new infectious conidia (De Ruiter *et al.*, 2019). While house flies  
258 become infected through any contact with the forcibly ejected *E. muscae* conidia (De Ruiter *et al.*,  
259 2019), the fungus-induced signalling that leads to increased male mating attempts with fungus-  
260 killed cadavers described here substantially increases the chance of infection.

261 We observed a significant increase in mating attempts when the cadaver was in a late sporulation  
262 stage. Close physical contact in late stage of infection increases the chance of fungal transmission  
263 because there are more infectious conidia compared to the early stage where the conidiophores are  
264 just maturing. However, when a halo of conidia was present on the surface around the cadaver in  
265 late stage of infection there was no increase in mating attempts. In spider mites infected with  
266 another entomophthoralean fungus, *Neozygites floridana*, healthy spider mites avoid conidia-  
267 covered cadavers likely because of repelling tactile cues from the conidia (Trandem *et al.*, 2015). In  
268 the *E. muscae* system, however, conidia were attractive to male house flies and the negative effect  
269 on mating imply male house flies investigate or feed off the surrounding conidia rather than being  
270 stimulated to mate. The initial volatile attraction is therefore not necessarily related to sexual  
271 behaviours and could instead be linked to feeding, in particular as we observed proboscis extension  
272 towards the conidia and as they were attractive to both males and females. Alternatively, the long-  
273 range attraction could be facilitated by volatiles eliciting sexual behaviours, while the flies switch to  
274 feeding behaviour at close range or in contact with the conidia. A similar mechanism has recently  
275 been suggested for specific pollinator attraction to an Australian spider orchid, *Caladenia*  
276 *drummondii*, pollinated by solitary thynnine wasps (Phillips, Bohman and Peakall, 2021).  
277 Behavioural attraction of males towards volatiles of late cadavers were highly depend on the time of  
278 day, which is suggestive of a relation with mating behaviours, which is known from other fly  
279 species such as *Drosophila suzukii* to be highly influenced by time of day (Revadi *et al.*, 2015).

280 Feeding and sexual behaviour is tightly linked in *D. melanogaster* (Spieth, 1974; Grosjean *et al.*,  
281 2011), which makes it difficult to distinguish whether the attracted house fly males are lured in  
282 from a distance due to mating cues or feeding cues (i.e. sexual or food mimicry, respectively).

283 *E. muscae* can induce epizootics in house fly populations (Mullens, Rodrigues and Meyer, 1987),  
284 and previous findings indicate that horizontal transmission can occur via conidial exchange between  
285 healthy males exposed to conidia and healthy females (Watson and Petersen, 1993). An increase in  
286 male sexual behaviour towards sporulating cadavers may thus serve the dual purpose both to infect  
287 the focal male fly, but also as a viable option for wider fungal transmission throughout a population.  
288 House flies have an emerging role in animal feed as house fly larvae (van Huis *et al.*, 2020), but  
289 especially under unsanitary conditions house flies also act as mechanical vectors for more than 100  
290 disease-causing human pathogens (Khamesipour *et al.*, 2018). This ambiguous role leads to  
291 situations where regulation of house fly populations may be necessary. The findings presented here  
292 may thus have potential for the discovery of novel semiochemical house fly-specific attractants or  
293 pheromones that could be used in pest control.

294 While the EAD-active sesquiterpenes emitted by *E. muscae* cadavers could not be identified in  
295 detail, ethyl octanoate was verified using a synthetic standard. This semiochemical is attractive to  
296 *D. melanogaster* (Schiabor, Quan and Eisen, 2014) and the tephritid fruit fly *Anastrepha ludens*  
297 (Robacker, Warfield and Flath, 1992; Malo *et al.*, 2005) and is generally associated with fruits (Riu-  
298 Aumatell *et al.*, 2004) and yeast fermentation (Gómez-Míguez *et al.*, 2007; Eder *et al.*, 2018). The  
299 volatile organic compounds produced by *E. muscae* clearly serve a manipulative behavioural  
300 function to attract healthy susceptible hosts, but have likely evolved from compounds produced for  
301 other purposes (Biedermann, De Fine Licht and Rohlf, 2019). Such precursors could be structural  
302 compounds, compounds with an integral function for the fungus' survival, or compounds that  
303 protect the cadaver from biotic and environmental factors. The functional adoption of ancestral  
304 compounds as fungus-emitted volatiles thus represent the evolution of an extended phenotypic trait  
305 (Dawkins, 1981) that exploit male flies' willingness to mate and benefit the fungus by altering the  
306 behavioural phenotype of uninfected healthy male host flies. As such, this is one of the first  
307 descriptions of a behaviour-manipulating pathogen that extends beyond the manipulation and death  
308 of the focally infected host, to also manipulate the behaviour of healthy individuals.

309

310



## 311 **Methods**

### 312 **Insect culture**

313 House flies (wildtype *Musca domestica*, strain 772a) were obtained as pupae from the department  
314 of Agroecology, Aarhus University, Denmark. After eclosion, flies were sexed and separated into  
315 sexes within 24 hours in cages of around 30-50 flies. Adult house flies were kept in cylindrical  
316 plastic containers (diameter: 7.5 cm, height: 8 cm) with a net covering the top. Here, they were  
317 continuously supplied with a diet consisting of 1:1 (V/V) skim milk powder and sugar, and water  
318 supplied from a 15-mL centrifuge tube inserted into the side of the container sealed with a cotton  
319 ball wick. They were kept at a 16:8 hour light/dark rhythm at an average temperature of  $21 \pm 1$  °C.

### 320 **Fungal cultures**

321 House flies were infected with *Entomophthora muscae* (isolate no.: KVL21-01, University of  
322 Copenhagen, Section for Organismal Biology Entomopathogenic fungus culture collection)  
323 originally isolated from a house fly caught in a cow stable (“Birkedal”, 55.835571, 12.154350) and  
324 the fungus were continuously maintained inside house fly hosts as previously described (Hansen  
325 and De Fine Licht, 2017). Once exposed to a *E. muscae* conidia shower, infected flies were moved  
326 to an individual incubator with a constant temperature of 19,5 °C. Here, a reverse light-dark rhythm  
327 consisting of 14:10 hours light/dark was applied, with the light ending at 10:00 am each morning.  
328 Six to seven days post *E. muscae* exposure, infected flies were checked and cadavers exhibiting  
329 clear *E. muscae* infection were collected at the end of the photoperiod. As *E. muscae* induces death  
330 synchronized with the end of the photoperiod in infected flies (Krasnoff *et al.*, 1995), the end of the  
331 photoperiod also corresponds to time of death and the majority of these cadavers were only on the  
332 verge of sporulation when they were collected (seen by visible conidiophores extruding from the  
333 cadaver).

### 334 **Mating activity experiment**

335 In order to determine male house fly sexual attraction towards *E. muscae* infected cadavers, mating  
336 activity experiments were performed. Here, an uninfected virgin male was anaesthetized by cooling  
337 at 5 °C for 2 minutes and placed within a clean, EtOH-rinsed glass Petri dish arena (diameter: 90  
338 mm, height: 16 mm), together with an infected or an uninfected control cadaver, fixated to the  
339 bottom with petroleum jelly. The experiments were conducted at a room temperature of  $21 \pm 1$  °C.  
340 Cadavers were divided into two groups: early killed (equivalent to an early sporulation stage), and

341 late killed (equivalent to a late sporulation stage). Early killed cadavers were used within 3 to 8  
342 hours post mortem, equivalent to most of the scotophase. Late killed cadavers were placed in a  
343 chamber with 85% RH humidity immediately after death to prevent desiccation, and used in  
344 experiments between ~ 25 to 30 hours post mortem. All uninfected house flies were killed by  
345 freezing for 6 minutes at -24 °C and *E. muscae* infected females and males were killed by *E. muscae*  
346 infection and showed characteristic white, fungal bands of conidiophores. All mating experiments  
347 were performed in the same room as rearing. For mating experiments, male-female and male-male  
348 trials were conducted from 10:48 am to 17:53 pm and from 09:24 am to 17:49 pm respectively.

349 The glass Petri dish arena was placed on a printed sheet of paper which denoted the exact middle of  
350 the arena, as well as an inner circle with a 16 mm radius around the cadaver. A video camera was  
351 placed 12 cm above the glass Petri dish arena. The behaviour of the male fly was filmed and  
352 monitored for 40 minutes and behaviors related to sexual attraction were noted in the software  
353 BORIS v. 6.2.4 (Friard and Gamba, 2016). Here, the number of mating attempts, time spent  
354 attempting mating, number of physical contacts, and time spent in the vicinity of the cadaver, were  
355 noted. The standard definition of house fly mating behaviour, a “mating strike”, was used as  
356 previously described (Murvosh, Fye and LaBrecque, 1964). A physical contact was defined as any  
357 physical contact between the male and the cadaver that was not a mating attempt nor was directly  
358 associated with one. Such physical contact varied from touching of legs or wings to if the subject  
359 crawled entirely over the cadaver. A new physical contact would be noted after complete  
360 dissociation of male and cadaver followed by a new touch. Time spent in the vicinity was measured  
361 as the time any body part of the male spent inside the 16 mm radius of the cadaver.

362 In order to determine successful *E. muscae* infections from associating with cadavers during assays,  
363 the living male subjects were anaesthetized with CO<sub>2</sub> and incubated individually in clean fly cages  
364 on a 1:1 skim milk powder sugar diet, supplied with clean water, immediately after each 40 minutes  
365 of observation. Flies were monitored daily until death and checked for visible fungal growth in the  
366 intersegmental membrane abdomen, characteristic of *E. muscae* infection.

### 367 **Mate choice experiment**

368 Mate choice experiments were performed as a two-choice assay in polystyrene Petridishes  
369 (diameter: 92 mm, height: 16 mm). A cadaver of each tested treatment was fixated with its ventral  
370 side of the thorax to the bottom in each side of the arena with petroleum jelly. Cadavers were placed  
371 so the heads faced the side and the abdomen faced the center of the arena. As in the mating activity

372 experiments, a video camera was placed 12 cm above the arena. A healthy virgin male was  
373 anaesthetized by cooling at 5 °C for 2 minutes and placed in the center of the arena, where after the  
374 male subjects were filmed for 40 minutes. The number of mating attempts (as previously defined)  
375 towards either cadaver were noted in the software BORIS v. 6.2.4 (Friard and Gamba, 2016).

### 376 **Conidia attraction experiment**

377 To determine attraction of *E. muscae* conidia, we performed a two-choice conidia attraction cage  
378 experiment. Here, two sticky trap discs had been exposed to a conidia shower from three cadavers  
379 of one sex, that were either *E. muscae* infected or uninfected freeze-killed controls (-24 °C, 6  
380 minutes) for 24 hours in 85% RH humidity. The sticky trap discs had been placed in the bottom of a  
381 polystyrene Petri dish (diameter: 92 mm, height: 16 mm), with the three cadavers fixed to the lid.  
382 After 24 hours, the lid and cadavers were removed and replaced with a new lid with a 1 cm  
383 diameter hole in the center. Both treatments of Petri dish traps (conidia and control) were wrapped  
384 in Parafilm, not covering the hole to eliminate visual cues, and placed inside a plexiglass cage  
385 (dimensions: 30 x 30 x 30 cm). Four virgin flies of the same sex (5-20 days old) were released in  
386 the cage and allowed to choose between traps for 24 hours. After 24 hours, the number of flies in  
387 each trap were counted and a preference index calculated (Quan and Eisen, 2018):

388 A = total number of flies in trap with conidia, B = total number of flies in trap with control:

$$Preference\ index = \frac{(A - B)}{(A + B)}$$

389 A positive PI indicates a preference for *E. muscae* conidia, whereas a negative PI indicates  
390 preference for the control. Flies that did not make a choice to either trap were excluded, as were  
391 trials where none of the four flies made a choice.

### 392 **Gas Chromatography-Mass Spectrometry (GC-MS) of cuticular compounds**

393 House fly samples were prepared in the exact same way as for the mating activity experiment and  
394 encompassed males and females in early (3 – 8 hours post mortem) and in late sporulation stages  
395 (25-30 hours post mortem) and corresponding controls (n = 5 of each treatment, all flies 8-10 days  
396 old). Conidia-samples were obtained by inserting individual sporulating house fly female (n = 2, 13  
397 days old) and male (n = 5, 9 days old) cadavers into cut pipette tips, so that the abdomen protruded  
398 from the end. This pipette tip was then gently inserted into a 2-mL glass vial and placed in a humid  
399 chamber with 85% RH for 24 hours. This allowed the conidia to be discharged from the abdominal

400 conidiophores into the vial without contact to the fly cadaver. House fly cuticular compounds and  
401 hexane-soluble fungal metabolites from individual flies, cadavers or conidia were extracted in 2-mL  
402 vials with 500  $\mu$ L *n*-hexane (for liquid chromatography LiChrosolv®, Sigma-Aldrich) for 5  
403 minutes. Thereafter the hexane extract was transferred to a new vial and concentrated under a  
404 steady stream of N<sub>2</sub> to a total volume of 40  $\mu$ L before analysis.

405 Extracts were injected into an Agilent 6890N GC equipped with a DB1 MS-UI column (60 meter  
406 length, 0.25 mm inner diameter, 0.25  $\mu$ m film thickness, Agilent Technologies) coupled to a 5975  
407 inert Mass Selective Detector (Agilent Technologies). Splitless injection (0.5 min) was applied  
408 (injector temperature 325 °C). The oven was programmed from an initial temperature of 200 °C for  
409 2 minutes and a ramp up of 8 °C/min to 340 °C and held for 15 minutes. Helium was used as the  
410 carrier gas with a linear velocity of 35 cm/s. The electron ionisation mass spectra were recorded at  
411 70 eV and samples were analysed in MSD ChemStation v. D.03.00.611 (Agilent Technologies).  
412 Retention times were related to an injected Kovats linear alkane mixture of carbon chain length C8-  
413 C40 and linear retention indices for each peak were calculated (van Den Dool and Dec. Kratz,  
414 1963). For tentative compound identifications, we used library searches against a NIST14 library  
415 and by comparing Kovats indices, mass spectra and diagnostic ions in previously published  
416 analyses (Nelson, Dillwith and Blomquist, 1981; Bagnères and Morgan, 1990; Stránský *et al.*, 1992,  
417 2006; Carlson, Bernier and Sutton, 1998; Mpuru *et al.*, 2001; Gulias Gomes, Trigo and Eiras, 2008;  
418 Zhang *et al.*, 2010).

#### 419 **Gas Chromatography-Mass Spectrometry (GC-MS) of volatile compounds**

420 Headspace samples were collected in a dynamic headspace sampling (aeration) of 20-22 hours. The  
421 aeration was collected from five cadavers of each sex, either actively sporulating or freeze-killed  
422 control cadavers, and blank samples without cadavers. The cadavers were placed in a glass Petri  
423 dish and enclosed in a cooking bag (Toppits). The outlet of an electrical air pump (KNF Neuberger,  
424 model PM 10879-NMP) was connected with silicone tubing, pushing air through a charcoal filter,  
425 tightly connected with the bag through a small opening. Similarly, at the opposite side of the bag, a  
426 filter made of Teflon-tubing and Porapak Q 50/80 adsorbent (Markes International) was tightly  
427 connected and joined with the pump air inlet to a closed-loop headspace collection system. Airflow  
428 was adjusted to 0,75 L/min for all samples. Adsorbed headspace samples were subsequently eluted  
429 from the Porapak filter with *n*-hexane (2 x 500  $\mu$ l) into 2-mL glass vials and concentrated under a  
430 gentle stream of N<sub>2</sub> to a total volume of 40  $\mu$ L before analysis. Samples (2  $\mu$ L) were injected into a

431 7890B GC/5977A GC/MSD system (Agilent Technologies) with a DB-Wax capillary column (60  
432 m length, 0.25 mm inner diameter, 0.25  $\mu\text{m}$  film thickness). Splitless injection (0.5 min) was  
433 applied (injector temperature 225  $^{\circ}\text{C}$ ). The oven was programmed from an initial temperature of 30  
434  $^{\circ}\text{C}$  for 3 minutes and a ramp up of 8  $^{\circ}\text{C}/\text{min}$  to 225  $^{\circ}\text{C}$  and held for 10 minutes. Helium was used as  
435 carrier gas with a linear velocity of 35 cm/s. The electron ionisation mass spectra were recorded at  
436 70 eV, and compounds were tentatively identified based on library searches against the NIST14  
437 library and Kovats indices from an injected alkane mixture of carbon chain length C8-C40 (van Den  
438 Dool and Dec. Kratz, 1963). Ethyl octanoate was identified by injection of a synthetic standard.  
439 Compounds found in at least three out of five samples for each treatment and not found in blank  
440 control samples, were included.

#### 441 **Electrophysiological recordings (EAG & GC-EAD)**

442 Electroantennography (EAG) and Electroantennographic Detection (GC-EAD) recordings were  
443 performed to measure male house fly antennal responses to infected and uninfected cadavers, and to  
444 identify key fungal odour components that elicited antennal responses. Electrophysiological  
445 recordings were performed on antennae of whole male house flies mounted in a cut pipette tip.  
446 Pulled glass capillaries with a silver wire and filled with Ringer solution (Merck Millipore, product  
447 no.: 115525) were placed on the tip of the funiculus and in the eye as recording and ground  
448 electrodes, respectively (Suppl. Fig. 16). Antennal responses were digitized with an IDAC-2 system  
449 (Syntech, Kirchzarten, Germany) and measured in software GcEad 2014 v 1.2.5 (Syntech). Carbon  
450 filter-purified air was humidified and delivered at 1,5 L/min to the antennae via a glass tube.

451 For EAG recordings, pulse stimuli (0.5 second puffs) were given with glass Pasteur pipettes  
452 containing the odorant on a filter paper (100 ng ethyl octanoate,  $n = 10$ ), an entire fly, or *E. muscae*  
453 conidia. Fly puff measurements were performed with fly cadavers with treatments similar to the  
454 mating activity experiment early sporulation ( $n = 6$ ), late sporulation ( $n = 10$ ), or with a living,  
455 uninfected fly ( $n = 10$ ). Pasteur pipettes for delivering puffs of conidia headspace or its respective  
456 control were prepared by placing an infected or uninfected, freeze-killed fly inside the Pasteur  
457 pipette for 24 hours and allowing it to sporulate at 85% RH. The cadaver was then removed, leaving  
458 only conidia inside ( $n = 10$ ). For puff stimulation, the tips of the glass pipettes were gently inserted  
459 into an opening of the side of the glass tube supplying the airstream of the EAG system onto the fly  
460 antennae.

461 For GC-EAD recordings, cuticular extracts (2  $\mu$ L) or headspace samples were injected manually  
462 into a 7890A GC System (Agilent Technologies) with a DB-Wax capillary column (30 m length,  
463 0.25 mm inner diameter, 0.25  $\mu$ m film thickness) as the stationary phase. Splitless injection (0.5  
464 min) was applied (injector temperature 215  $^{\circ}$ C). The oven was programmed from an initial  
465 temperature of 30  $^{\circ}$ C for 3 minutes and a ramp up of 8  $^{\circ}$ C/min to 225  $^{\circ}$ C and held for 20 minutes.  
466 Helium was used as carrier gas with a linear velocity of 45 cm/s. The GC was coupled to an EAD  
467 and a flame ionization detector (FID). Retention indices of any response-eliciting peak were  
468 determined based on injected linear alkane mixture of carbon chain length C8-C20 and compared to  
469 that of the GC-MS headspace injections. Ethyl octanoate was injected as a synthetic standard to  
470 confirm antennal EAD-activity in cases where there was no response. For both EAG and GC-EAD,  
471 responses were determined by measuring the amplitude of depolarization in millivolt (mV) elicited  
472 on the antenna (n = 3 biological replicates with 2-3 technical replicates on each housefly) by the  
473 individual treatment different to baseline.

474

#### 475 **Y-tube olfactometer choice test**

476 Male house fly attraction to infected or uninfected headspace samples were tested in a glass Y-tube  
477 olfactometer. The olfactometer had a 17 cm long base and 9 cm long arms at 90 $^{\circ}$  angle with an  
478 inner diameter of 2 cm. Each side was connected to a glass cylinder (5 cm long, 1.5 cm internal  
479 diameter), which served as an odour-release compartment and was separated from the air supply  
480 with a piece of metal netting. A steady stream of humidified, charcoal-filtered air was supplied to  
481 each arm at 0.4 L/min with an air pump (KNF Neuberger, model NMP 830 KNDC). The glass Y-  
482 tube was washed, rinsed with ethanol (70%) and baked at 120  $^{\circ}$ C for 2 hours before each round of  
483 experiments. Headspace samples were collected with an active headspace sampling method  
484 (aeration) and eluted with *n*-hexane similar to GC-MS analysis of headspace. 10  $\mu$ L infected or  
485 uninfected headspace samples (10  $\mu$ L) were loaded onto a filter paper (1.5 cm x 1 cm), and used in  
486 the Y-tube immediately after the solvent had evaporated. Odor sources were only used for a single  
487 choice test and the positions of each odor was switched after each test. Healthy, unmated flies were  
488 allowed to walk from their cage individually into *Drosophila* polypropylene tubes (WVR) with a  
489 cotton plug and allowed to acclimate for 30 minutes, before they were introduced at the base of the  
490 olfactometer. A response choice to uninfected control- or infected house fly headspace was made  
491 once the male entered past 5 cm in one arm within 3 minutes. All Y-tube choice tests were made at



492 room temperature under diffuse dim light. We observed a strong effect of time of day, where only  
493 experiments conducted in the afternoon (2 PM – 6 PM) yielded a behavioural response, and data for  
494 this time-period were therefore analysed by calculating a preference index per group of flies that  
495 made a choice per hour for each day the test was conducted.

#### 496 **RNA Sequencing and transcriptomic analysis**

497 Five early sporulation stage cadavers, five late sporulation stage cadavers, five early uninfected  
498 control cadavers, and four late uninfected control cadavers, all unmated female flies that had been  
499 prepared similarly to cadavers in the mating activity experiment, were collected. All cadaver  
500 samples were 10-11 days old at the time of death. The cadavers were snap-frozen in liquid N<sub>2</sub> and  
501 stored at -80 °C until extraction. For extraction, samples were crushed with a mortar and pestle and  
502 further homogenized with glass beads in a TissueLyzer (Qiagen). Total RNA was extracted using  
503 phenol/chlorophorm/isoamylalcohol phase-separation followed by a GeneJET RNA Purification Kit  
504 (Thermo Scientific™), according to the manufacturer’s instructions. PolyA-mRNA library  
505 preparation and 100 bp paired-end un-stranded DNBseq sequencing were conducted by BGI Europe  
506 A/S. For quality control and filtering, reads with low quality were filtered using a maxEE value of  
507 2, while the first 10 bp of each read were trimmed, and all reads had a minimum length of 35 bp  
508 using function “filterAndTrim” in the R-package “dada2” (R version 4.0.3). FastQ files were  
509 visually inspected before and after trimming with FastQC (Babraham Bioinformatics, 2019). Reads  
510 were mapped to a concatenated reference consisting of house fly (*Musca domestica*, ncbi version  
511 2.02, RefSeq: GCF\_000371365.1) and *E. muscae* transcripts (European Nucleotide Archive (ENA)  
512 at EMBL-EBI, accession no. ERZ2299657) using the software kallisto (Bray *et al.*, 2016) version  
513 0.46.1. Differential expression analysis was conducted in R version 4.0.3 using the package  
514 “DEseq2” requiring a fold-change > 1 and a p-value < 0.001 adjusted for multiple testing to  
515 designate significant differential expression per gene. Samples were analysed pairwise as infected  
516 early vs control early and infected late vs control late for house fly genes, whereas *E. muscae*  
517 transcripts were compared between infected late vs infected early.

#### 518 **Statistical analysis**

519 All statistical analysis of data were performed in R version 4.0.3. The mating activity experiment  
520 and choice mating experiment were analysed similarly, with the house fly mating attempts using  
521 treatment as a descriptor with a Kruskal-Wallis rank sum test. Pairwise comparisons were  
522 performed with a Dunn’s test for multiple comparisons with a Bonferroni adjustment.

523 In the conidia attraction experiments, only flies caught in a trap were used for analysis. In order to  
524 focus on the attraction towards conidia alone, the flies that had not “chosen” a trap were excluded.  
525 Number of counted flies were analysed with a logistic regression. Choices towards either trap were  
526 described as a function of trap treatment (conidia or control), the choosing sex, the sex of the  
527 conidia-discharging cadaver and house fly age as a random factor. Y-tube experiments were  
528 grouped based on the time of the day the experiment was performed and analysed using the exact  
529 binomial test.

530 Signal amplitudes of electroantennographic recordings were log-transformed to fit normality and  
531 tested with a Shapiro-Wilks test to meet the assumptions for parametric tests. The amplitudes  
532 obtained from stimulation with cadavers or conidia were analysed with a linear mixed model and  
533 milli-Volts (mV) were described as a function of treatment and with the mounted fly as a random  
534 factor. Tukey’s Posthoc tests were performed for pairwise comparisons with a Bonferroni  
535 correction. Statistical analyses were performed using R packages lme4 and emmeans.

536 Principal component analysis was calculated on fourth-root transformed total ion chromatogram  
537 (TIC) abundance counts of compounds found in cuticular hexane extracts and extracts from conidia,  
538 using packages “FactoMineR” and “Factoextra” in R, version 4.0.3. Compound peaks that in  
539 infected fly samples contained co-eluting fungus-derived compounds were excluded from analysis  
540 from all sample types.

#### 541 **Data availability**

542 The RNAseq data that support the findings of this study are available from the National Center for  
543 Biotechnology Information’s Short Read Archive (SRA) (BioProject ID: PRJNA758214). All other  
544 data are provided in the supplementary material linked to this article.

#### 545 **Code availability**

546 No custom code was generated for this study.

547

#### 548 **References**

549 Adamo, S. A. (2013) ‘Parasites: Evolution’s neurobiologists’, *Journal of Experimental Biology*,  
550 216(1), pp. 3–10. doi: 10.1242/jeb.073601.

- 551 Adams, T. S. and Holt, G. G. (1987) ‘Effect of pheromone components when applied to different  
552 models on male sexual behaviour in the housefly, *Musca domestica*’, *Journal of Insect Physiology*,  
553 33(1). doi: 10.1016/0022-1910(87)90099-0.
- 554 Adams, T. S., Nelson, D. R. and Fatland, C. L. (1995) ‘Effect of methylalkanes on male house fly,  
555 *Musca domestica*, sexual behavior’, *Journal of Insect Physiology*, 41(5), pp. 443–449. doi:  
556 10.1016/0022-1910(94)00108-S.
- 557 Andersson, M. (1994) *Sexual Selection*. Princeton University Press. doi: 10.1515/9780691207278.
- 558 Babraham Bioinformatics (2019) *FastQC: A quality control tool for high throughput sequence*  
559 *data*. Available at: <https://www.bioinformatics.babraham.ac.uk/projects/fastqc/>.
- 560 Bagnères, A. G. and Morgan, E. D. (1990) ‘A simple method for analysis of insect cuticular  
561 hydrocarbons’, *Journal of Chemical Ecology*, 16(12), pp. 3263–3276. doi: 10.1007/BF00982097.
- 562 de Bekker, C. *et al.* (2015) ‘Gene expression during zombie ant biting behavior reflects the  
563 complexity underlying fungal parasitic behavioral manipulation’, *BMC Genomics*. *BMC Genomics*,  
564 16(1), p. 620. doi: 10.1186/s12864-015-1812-x.
- 565 de Bekker, C., Beckerson, W.C. and Elya, C. (2021) Mechanisms behind the madness: how do  
566 zombie-making fungal entomopathogens affect host behavior to increase transmission?, *mBio*  
567 12:e01872-21. <https://doi.org/10.1128/mBio.01872-21>.
- 568 Biedermann, P. H. W., De Fine Licht, H. H. and Rohlf, M. (2019) ‘Evolutionary chemo-ecology of  
569 insect-fungus interactions: Still in its infancy but advancing’, *Fungal Ecology*, 38, pp. 1–6. doi:  
570 10.1016/j.funeco.2018.11.010.
- 571 Blomquist, G. J., Tittiger, C. and Jurenka, R. (2020) ‘Cuticular hydrocarbons and pheromones of  
572 arthropods’, in *Hydrocarbons, Oils and Lipids: Diversity, Origin, Chemistry and Fate*. Cham:  
573 Springer International Publishing, pp. 213–244. doi: 10.1007/978-3-319-90569-3\_11.
- 574 Botnevik, C. F. *et al.* (2016) ‘Relative effects of temperature, light, and humidity on clinging  
575 behavior of metacercariae-infected ants’, *Journal of Parasitology*, 102(5), pp. 495–500. doi:  
576 10.1645/16-53.
- 577 Bray, N. L. *et al.* (2016) ‘Near-optimal probabilistic RNA-seq quantification’, *Nature*  
578 *Biotechnology*, 34(5), pp. 525–527. doi: 10.1038/nbt.3519.

- 579 Butler, S. M. *et al.* (2009) ‘Characterization of age and cuticular hydrocarbon variation in mating  
580 pairs of house fly, *Musca domestica*, collected in the field’, *Medical and Veterinary Entomology*,  
581 23(4), pp. 426–442. doi: 10.1111/j.1365-2915.2009.00831.x.
- 582 Carlson, D. A. *et al.* (1971) ‘Sex attractant pheromone of the house fly: Isolation, identification and  
583 synthesis’, *Science*, 174(4004), pp. 76–78. doi: 10.1126/science.174.4004.76.
- 584 Carlson, D. A., Bernier, U. R. and Sutton, B. D. (1998) ‘Elution patterns from capillary GC for  
585 methyl-branched alkanes’, *Journal of Chemical Ecology*, 24(11), pp. 1845–1865. doi:  
586 10.1023/A:1022311701355.
- 587 Cohen, C. *et al.* (2021) ‘Sexual deception of a beetle pollinator through floral mimicry’, *Current*  
588 *Biology*, 31(9), pp. 1962–1969.e6. doi: 10.1016/j.cub.2021.03.037.
- 589 Cooley, J. R., Marshall, D. C. and Hill, K. B. R. (2018) ‘A specialized fungal parasite (*Massospora*  
590 *cicadina*) hijacks the sexual signals of periodical cicadas (Hemiptera: Cicadidae: Magicicada)’,  
591 *Scientific Reports*. Springer US, 8(1), p. 1432. doi: 10.1038/s41598-018-19813-0.
- 592 Darbro, J. M. *et al.* (2005) ‘Survey of muscalure [(Z)-9-tricosene] on house flies (Diptera:  
593 Muscidae) from field populations in California’, *Environmental Entomology*, 34(6), pp. 1418–1425.  
594 doi: 10.1603/0046-225X-34.6.1418.
- 595 Dawkins, R. (1982) *The Extended Phenotype - The Gene as the Unit of Selection*. Oxford  
596 University Press.
- 597 Ding, Y. *et al.* (2017) ‘Selinene volatiles are essential precursors for maize defense promoting  
598 fungal pathogen resistance’, *Plant Physiology*, 175(3), pp. 1455–1468. doi: 10.1104/pp.17.00879.
- 599 van Den Dool, H. and Dec. Kratz, P. (1963) ‘A generalization of the retention index system  
600 including linear temperature programmed gas-liquid partition chromatography’, *Journal of*  
601 *Chromatography A*, 11(C), pp. 463–471. doi: 10.1016/S0021-9673(01)80947-X.
- 602 Eder, M. *et al.* (2018) ‘QTL mapping of volatile compound production in *Saccharomyces cerevisiae*  
603 during alcoholic fermentation’, *BMC Genomics*. BMC Genomics, 19(1), pp. 1–19. doi:  
604 10.1186/s12864-018-4562-8.
- 605 Evans, W. S. *et al.* (1998) ‘Evidence that the factor used by the tapeworm, *Hymenolepis diminuta*,  
606 to direct the foraging of its intermediate host, *Tribolium confusum*, is a volatile attractant’, *Journal*

- 607 *of Parasitology*, 84(6), pp. 1098–1101. doi: 10.2307/3284655.
- 608 Friard, O. and Gamba, M. (2016) ‘BORIS: a free, versatile open-source event-logging software for  
609 video/audio coding and live observations’, *Methods in Ecology and Evolution*, 7(11), pp. 1325–  
610 1330. doi: 10.1111/2041-210X.12584.
- 611 Gal, R. and Libersat, F. (2010) ‘A wasp manipulates neuronal activity in the sub-esophageal  
612 ganglion to decrease the drive for walking in its cockroach prey’, *PLoS ONE*. Edited by V. Brezina,  
613 5(4), p. e10019. doi: 10.1371/journal.pone.0010019.
- 614 George, J. *et al.* (2013) ‘Malaria mosquitoes attracted by fatal fungus’, *PLoS ONE*. Edited by M.  
615 Heil, 8(5), p. e62632. doi: 10.1371/journal.pone.0062632.
- 616 Gómez-Míguez, M. J. *et al.* (2007) ‘Volatile components of Zalema white wines’, *Food Chemistry*,  
617 100(4), pp. 1464–1473. doi: 10.1016/j.foodchem.2005.11.045.
- 618 Goulson, D. *et al.* (1999) ‘Size, symmetry, and sexual selection in the housefly, *Musca domestica*’,  
619 *Evolution*, 53(2), p. 527. doi: 10.2307/2640788.
- 620 Grosjean, Y. *et al.* (2011) ‘An olfactory receptor for food-derived odours promotes male courtship  
621 in *Drosophila*’, *Nature*, 478(7368), pp. 236–240. doi: 10.1038/nature10428.
- 622 Gulias Gomes, C. C., Trigo, J. R. and Eiras, Á. E. (2008) ‘Sex pheromone of the American warble  
623 fly, *Dermatobia hominis*: The role of cuticular hydrocarbons’, *Journal of Chemical Ecology*, 34(5),  
624 pp. 636–646. doi: 10.1007/s10886-008-9473-8.
- 625 Haber, A. I. *et al.* (2019) ‘A key floral scent component ( $\beta$ -trans-bergamotene) drives pollinator  
626 preferences independently of pollen rewards in seep monkeyflower’, *Functional Ecology*, 33(2), pp.  
627 218–228. doi: 10.1111/1365-2435.13246.
- 628 Hansen, A. N. and De Fine Licht, H. H. (2017) ‘Logistic growth of the host-specific obligate insect  
629 pathogenic fungus *Entomophthora muscae* in house flies (*Musca domestica*)’, *Journal of Applied*  
630 *Entomology*, pp. 1–4. doi: 10.1111/jen.12380.
- 631 Hansen, A. N. and De Fine Licht, H. H. (2019) ‘Why are there so few examples of  
632 entomopathogenic fungi that manipulate host sexual behaviors?’, *Fungal Ecology*. Elsevier Ltd, 38,  
633 pp. 21–27. doi: 10.1016/j.funeco.2018.09.004.
- 634 Hayashi, T. *et al.* (2021) ‘An unusual tricosatriene is crucial for male fungus gnat attraction and

- 635 exploitation by sexually deceptive *Pterostylis* orchids’, *Current Biology*, (31), pp. 1–8. doi:  
636 10.1016/j.cub.2021.01.095.
- 637 Helluy, S. and Thomas, F. (2003) ‘Effects of *Microphallus papillorobustus* (Platyhelminthes:  
638 Trematoda) on serotonergic immunoreactivity and neuronal architecture in the brain of *Gammarus*  
639 *insensibilis* (Crustacea: Amphipoda)’, *Proceedings of the Royal Society B: Biological Sciences*,  
640 270(1515), pp. 563–568. doi: 10.1098/rspb.2002.2264.
- 641 Hojo, M. K., Pierce, N. E. and Tsuji, K. (2015) ‘Lycaenid caterpillar secretions manipulate  
642 attendant ant behavior’, *Current Biology*. Elsevier Ltd, 25(17), pp. 2260–2264. doi:  
643 10.1016/j.cub.2015.07.016.
- 644 Hoover, K. *et al.* (2011) ‘A gene for an extended phenotype’, *Science*, 333(6048), p. 1401. doi:  
645 10.1126/science.1209199.
- 646 van Houte, S., Ros, V. I. D. and van Oers, M. M. (2013) ‘Walking with insects: molecular  
647 mechanisms behind parasitic manipulation of host behaviour’, *Molecular Ecology*, 22(13), pp.  
648 3458–3475. doi: 10.1111/mec.12307.
- 649 Hughes, D. P. and Libersat, F. (2018) ‘Neuroparasitology of parasite-insect associations’, *Annual*  
650 *Review of Entomology*, 63, pp. 471–487. doi: 10.1146/annurev-ento-020117-043234.
- 651 van Huis, A. *et al.* (2020) ‘Insects as feed: house fly or black soldier fly?’, *Journal of Insects as*  
652 *Food and Feed*, 6(3), pp. 221–229. doi: 10.3920/jiff2020.x003.
- 653 Keeseey, I. W. *et al.* (2017) ‘Pathogenic bacteria enhance dispersal through alteration of *Drosophila*  
654 social communication’, *Nature Communications*. Springer US, 8(1), p. 265. doi: 10.1038/s41467-  
655 017-00334-9.
- 656 Khamesipour, F. *et al.* (2018) ‘A systematic review of human pathogens carried by the housefly  
657 (*Musca domestica* L.)’, *BMC Public Health*. BMC Public Health, 18(1), pp. 1–15. doi:  
658 10.1186/s12889-018-5934-3.
- 659 Könen, P. P. and Wüst, M. (2019) ‘Analysis of sesquiterpene hydrocarbons in grape berry exocarp (  
660 *Vitis vinifera* L.) using in vivo-labeling and comprehensive two-dimensional gas chromatography–  
661 mass spectrometry (GC×GC–MS)’, *Beilstein Journal of Organic Chemistry*. Beilstein-Institut, 15,  
662 pp. 1945–1961. doi: 10.3762/bjoc.15.190.



- 663 Krasnoff, S. B. *et al.* (1995) ‘Behavioral effects of the entomopathogenic fungus, *Entomophthora*  
664 *muscae* on its host *Musca domestica*: Postural changes in dying hosts and gated pattern of  
665 mortality’, *Journal of Insect Physiology*, 41(10), pp. 895–903. doi: 10.1016/0022-1910(95)00026-  
666 Q.
- 667 Lam, K. *et al.* (2010) ‘Semiochemical-mediated oviposition avoidance by female house flies,  
668 *Musca domestica*, on animal feces colonized with harmful fungi’, *Journal of Chemical Ecology*,  
669 36(2), pp. 141–147. doi: 10.1007/s10886-010-9741-2.
- 670 Lebreton, S. *et al.* (2017) ‘A *Drosophila* female pheromone elicits species-specific long-range  
671 attraction via an olfactory channel with dual specificity for sex and food’, *BMC Biology*. BMC  
672 Biology, 15(1), pp. 1–14. doi: 10.1186/s12915-017-0427-x.
- 673 Lefèvre, T. *et al.* (2009) ‘Chapter 3: Invasion of the body snatchers’, in *Advances in Parasitology*,  
674 pp. 45–83. doi: 10.1016/S0065-308X(08)00603-9.
- 675 Lovett, B. *et al.* (2020) ‘Behavioral betrayal: How select fungal parasites enlist living insects to do  
676 their bidding’, *PLoS Pathogens*, 16(6), pp. 1–7. doi: 10.1371/journal.ppat.1008598.
- 677 Małagocka, J., Jensen, A. B. and Eilenberg, J. (2017) ‘*Pandora formicae*, a specialist ant  
678 pathogenic fungus: New insights into biology and taxonomy’, *Journal of Invertebrate Pathology*,  
679 143, pp. 108–114. doi: 10.1016/j.jip.2016.12.007.
- 680 Malo, E. A. *et al.* (2005) ‘Behavioral and electrophysiological responses of the Mexican fruit fly  
681 (Diptera: Tephritidae) to guava volatiles’, *Florida Entomologist*, 88(4), pp. 364–371. doi:  
682 10.1653/0015-4040(2005)88[364:BAEROT]2.0.CO;2.
- 683 Mauck, K. E., De Moraes, C. M. and Mescher, M. C. (2010) ‘Deceptive chemical signals induced  
684 by a plant virus attract insect vectors to inferior hosts’, *Proceedings of the National Academy of*  
685 *Sciences of the United States of America*, 107(8), pp. 3600–3605. doi: 10.1073/pnas.0907191107.
- 686 Mithöfer, A. and Boland, W. (2012) ‘Plant defense against herbivores: Chemical aspects’, *Annual*  
687 *Review of Plant Biology*, 63(1), pp. 431–450. doi: 10.1146/annurev-arplant-042110-103854.
- 688 Møller, A. P. (1993) ‘A fungus infecting domestic flies manipulates sexual behaviour of its host’,  
689 *Behavioral Ecology and Sociobiology*, 33(6), pp. 403–407. doi: 10.1007/BF00170255.
- 690 Mpuru, S. *et al.* (2001) ‘Effect of age and sex on the production of internal and external

- 691 hydrocarbons and pheromones in the housefly, *Musca domestica*’, *Insect Biochemistry and*  
692 *Molecular Biology*, 31(9), p. 935. doi: 10.1016/S0965-1748(01)00080-7.
- 693 Mullens, B. A., Rodrigues, J. L. and Meyer, J. A. (1987) ‘An epizootiological study of  
694 *Entomophthora muscae* in muscoid fly populations on southern california poultry facilities, with  
695 emphasis on *Musca domestica*’, *Hilgardia*, 55(3).
- 696 Murvosh, C. M., Fye, R. L. and LaBrecque, G. C. (1964) ‘Studies on the mating behavior of the  
697 house fly, *Musca Domestica* L.’, *The Ohio Journal of Science*, 64(4), pp. 264–271. doi:  
698 10.1093/jee/63.1.207.
- 699 Nelson, D. R., Dillwith, J. W. and Blomquist, G. J. (1981) ‘Cuticular hydrocarbons of the house fly,  
700 *Musca domestica*’, *Insect Biochemistry*, 11(2), pp. 187–197. doi: 10.1016/0020-1790(81)90095-0.
- 701 Noorman, N. and Otter, C. J. (2001) ‘The effects of laboratory culturing on (Z)-9-tricosene  
702 (muscalure) quantities on female houseflies’, *Entomologia Experimentalis et Applicata*, 101(1), pp.  
703 69–80. doi: 10.1046/j.1570-7458.2001.00892.x.
- 704 Phillips, R. D., Bohman, B. and Peakall, R. (2021) ‘Pollination by nectar-foraging pompilid wasps:  
705 a new specialized pollination strategy for the Australian flora’, *Plant Biology*. Edited by A. Dafni,  
706 p. plb.13286. doi: 10.1111/plb.13286.
- 707 Quan, A. S. and Eisen, M. B. (2018) ‘The ecology of the *Drosophila*-yeast mutualism in wineries’,  
708 *PLOS ONE*. Edited by J. Schacherer, 13(5), p. e0196440. doi: 10.1371/journal.pone.0196440.
- 709 Revadi, S. *et al.* (2015) ‘Sexual behavior of *Drosophila suzukii*’, *Insects*, 6(1), pp. 183–196. doi:  
710 10.3390/insects6010183.
- 711 Riu-Aumatell, M. *et al.* (2004) ‘Characterisation of volatile compounds of fruit juices and nectars  
712 by HS/SPME and GC/MS’, *Food Chemistry*, 87(4), pp. 627–637. doi:  
713 10.1016/j.foodchem.2003.12.033.
- 714 Robacker, D. C., Warfield, W. C. and Flath, R. A. (1992) ‘A four-component attractant for the  
715 mexican fruit fly, *Anastrepha ludens* (Diptera: Tephritidae), from host fruit’, *Journal of Chemical*  
716 *Ecology*, 18(7), pp. 1239–1254. doi: 10.1007/BF00980077.
- 717 Rogoff, W. M. *et al.* (1964) ‘A sex pheromone in the housefly, *Musca domestica* L.’, *Journal of*  
718 *Insect Physiology*, 10(2), pp. 239–246. doi: 10.1016/0022-1910(64)90006-X.

- 719 Ros, V. I. D. *et al.* (2015) ‘Baculovirus-induced tree-top disease: How extended is the role of egt as  
720 a gene for the extended phenotype?’, *Molecular Ecology*, 24(1), pp. 249–258. doi:  
721 10.1111/mec.13019.
- 722 De Ruiter, J. *et al.* (2019) ‘Fungal artillery of zombie flies: Infectious spore dispersal using a soft  
723 water cannon’, *Journal of the Royal Society Interface*, 16(159). doi: 10.1098/rsif.2019.0448.
- 724 Ryan, M. J. and Rand, A. S. (1993) ‘Species recognition and sexual selection as a unitary problem  
725 in animal communication’, *Evolution*, 47(2), pp. 647–657. doi: 10.1111/j.1558-  
726 5646.1993.tb02118.x.
- 727 Saerens, S. M. G. *et al.* (2006) ‘The *Saccharomyces cerevisiae* EHT1 and EEB1 genes encode  
728 novel enzymes with medium-chain fatty acid ethyl ester synthesis and hydrolysis capacity’, *Journal*  
729 *of Biological Chemistry*. Currently published by Elsevier Inc; originally published by American  
730 Society for Biochemistry and Molecular Biology., 281(7), pp. 4446–4456. doi:  
731 10.1074/jbc.M512028200.
- 732 Saerens, S. M. G. *et al.* (2008) ‘Parameters affecting ethyl ester production by *Saccharomyces*  
733 *cerevisiae* during fermentation’, *Applied and Environmental Microbiology*, 74(2), pp. 454–461. doi:  
734 10.1128/AEM.01616-07.
- 735 Schiabor, K. M., Quan, A. S. and Eisen, M. B. (2014) ‘*Saccharomyces cerevisiae* mitochondria are  
736 required for optimal attractiveness to *Drosophila melanogaster*’, *PLoS ONE*, 9(12), pp. 1–18. doi:  
737 10.1371/journal.pone.0113899.
- 738 Schiestl, F. P. *et al.* (2000) ‘Sex pheromone mimicry in the early spider orchid (*Ophrys sphegodes*):  
739 Patters of hydrocarbons as the key mechanism for pollination by sexual deception’, *Journal of*  
740 *Comparative Physiology - A Sensory, Neural, and Behavioral Physiology*, 186(6), pp. 567–574.  
741 doi: 10.1007/s003590000112.
- 742 Schmid-Hempel, P. (2011) *Evolutionary parasitology: The integrated study of infections,*  
743 *immunology, ecology and genetics.*, *Trends in parasitology*. Oxford University Press. Available at:  
744 <http://www.ncbi.nlm.nih.gov/pubmed/21497137>.
- 745 Shea, J. F. (2007) ‘Lack of preference for infective faeces in *Hymenolepis diminuta*-infected beetles  
746 (*Tenebrio molitor*)’, *Journal of Helminthology*, 81(3), pp. 293–299. doi:  
747 10.1017/S0022149X07818517.

- 748 Shostak, A. W. and Smyth, K. A. (1998) ‘Activity of flour beetles (*Tribolium confusum*) in the  
749 presence of feces from rats infected with rat tapeworm (*Hymenolepis diminuta*)’, *Canadian Journal*  
750 *of Zoology*, 76(8), pp. 1472–1479. doi: 10.1139/z98-081.
- 751 Spieth, H. T. (1974) ‘Courtship Behavior in *Drosophila*’, *Annual Review of Entomology*, pp. 297–  
752 297. doi: 10.1007/978-3-540-48996-2\_720.
- 753 Stanjek, V. *et al.* (1997) ‘Changes in the leaf surface chemistry of *Apium graveolens* (apiaceae)  
754 stimulated by jasmonic acid and perceived by a specialist insect’, *Helvetica Chimica Acta*, 80(5),  
755 pp. 1408–1420. doi: 10.1002/hlca.19970800507.
- 756 Stránský, K. *et al.* (1992) ‘An improved method of characterizing fatty acids by equivalent chain  
757 length values’, *Journal of High Resolution Chromatography*, 15(11), pp. 730–740. doi:  
758 10.1002/jhrc.1240151107.
- 759 Stránský, K. *et al.* (2006) ‘Gas chromatographic retention data of wax esters’, *Journal of*  
760 *Chromatography A*, 1128(1–2), pp. 208–219. doi: 10.1016/j.chroma.2006.06.035.
- 761 Tobin, E. N. and Stoffolano, J. G. (1973) ‘The courtship of *Musca* species found in North America.  
762 II. The face fly, *Musca autumnalis*, and a comparison’, *Annals of the Entomological Society of*  
763 *America*, 66(6), pp. 1329–1334. doi: 10.1093/aesa/66.6.1329.
- 764 Trandem, N. *et al.* (2015) ‘Fatal attraction: Male spider mites prefer females killed by the mite-  
765 pathogenic fungus *Neozygites floridana*’, *Journal of Invertebrate Pathology*. Elsevier Inc., 128, pp.  
766 6–13. doi: 10.1016/j.jip.2015.04.002.
- 767 Trivers, R. L. (1972) ‘Parental Investment and Sexual Selection’, in Campbell, B. G. (ed.) *Sexual*  
768 *Selection and the Descent of Man*. Aldine Publishing Company, pp. 136–179. doi:  
769 10.4324/9781315129266-7.
- 770 Vranová, E., Coman, D. and Gruissem, W. (2013) ‘Network analysis of the MVA and MEP  
771 pathways for isoprenoid synthesis’, *Annual Review of Plant Biology*, 64, pp. 665–700. doi:  
772 10.1146/annurev-arplant-050312-120116.
- 773 Watson, D. W. and Petersen, J. J. (1993) ‘Sexual activity of male *Musca domestica* (Diptera:  
774 Muscidae) infected with *Entomophthora muscae* (Entomophthoraceae: Entomophthorales)’,  
775 *Biological Control*, 3(1), pp. 22–26. doi: 10.1006/bcon.1993.1004.

776 Zhang, L. xiao *et al.* (2010) ‘Discovery of mass spectral characteristics and automatic identification  
777 of wax esters from gas chromatography mass spectrometry data’, *Journal of Chromatography A*.  
778 Elsevier B.V., 1217(23), pp. 3695–3701. doi: 10.1016/j.chroma.2010.03.056.

779 Zhang, X.-M. (2018) ‘Floral volatile sesquiterpenes of *Elsholtzia rugulosa* (Lamiaceae) selectively  
780 attract Asian honey bees’, *Journal of Applied Entomology*, 142(3), pp. 359–362. doi:  
781 10.1111/jen.12481.

782 Zhang, X. *et al.* (2019) ‘Entomopathogenic nematodes increase predation success by inducing  
783 specific cadaver volatiles that attract healthy herbivores’, *eLife*, 8, pp. 1–21. doi: 10.1101/442483.

784 Zurek, L. *et al.* (2002) ‘Effect of the entomopathogenic fungus, *Entomophthora muscae*  
785 (Zygomycetes: Entomophthoraceae), on sex pheromone and other cuticular hydrocarbons of the  
786 house fly, *Musca domestica*’, *Journal of Invertebrate Pathology*, 80(3), pp. 171–176. doi:  
787 10.1016/S0022-2011(02)00109-X.

788

789

## 790 **Acknowledgements**

791 A.N. and H.H.D.F.L. were supported by a grant (no. DFF - 7014-00188) to HHDFL from the  
792 Independent Research Fund Denmark.

## 793 **Author contributions**

794 A.N. and H.H.D.F.L. conceived of the study. A.N., H.H.D.F.L., P.G.B., and A.B.J. designed the  
795 study. A.N. performed *E. muscae* in-vivo rearing, behavioural assays and analysis, chemical sample  
796 collection, RNA extraction. A.N, P.G.B., and C.A.K. analysed chemical data. A.N., and H.H.D.F.L.  
797 analysed RNAseq data. A.N. and H.H.D.F.L. wrote the initial draft of the paper. A.N., H.H.D.F.L.,  
798 P.G.B., A.B.J., B.B., C.A.K. contributed to interpreting the data and editing subsequent drafts of the  
799 manuscript.

## 800 **Competing interests**

801 The authors declare no competing interests.

802

803

Figure 1

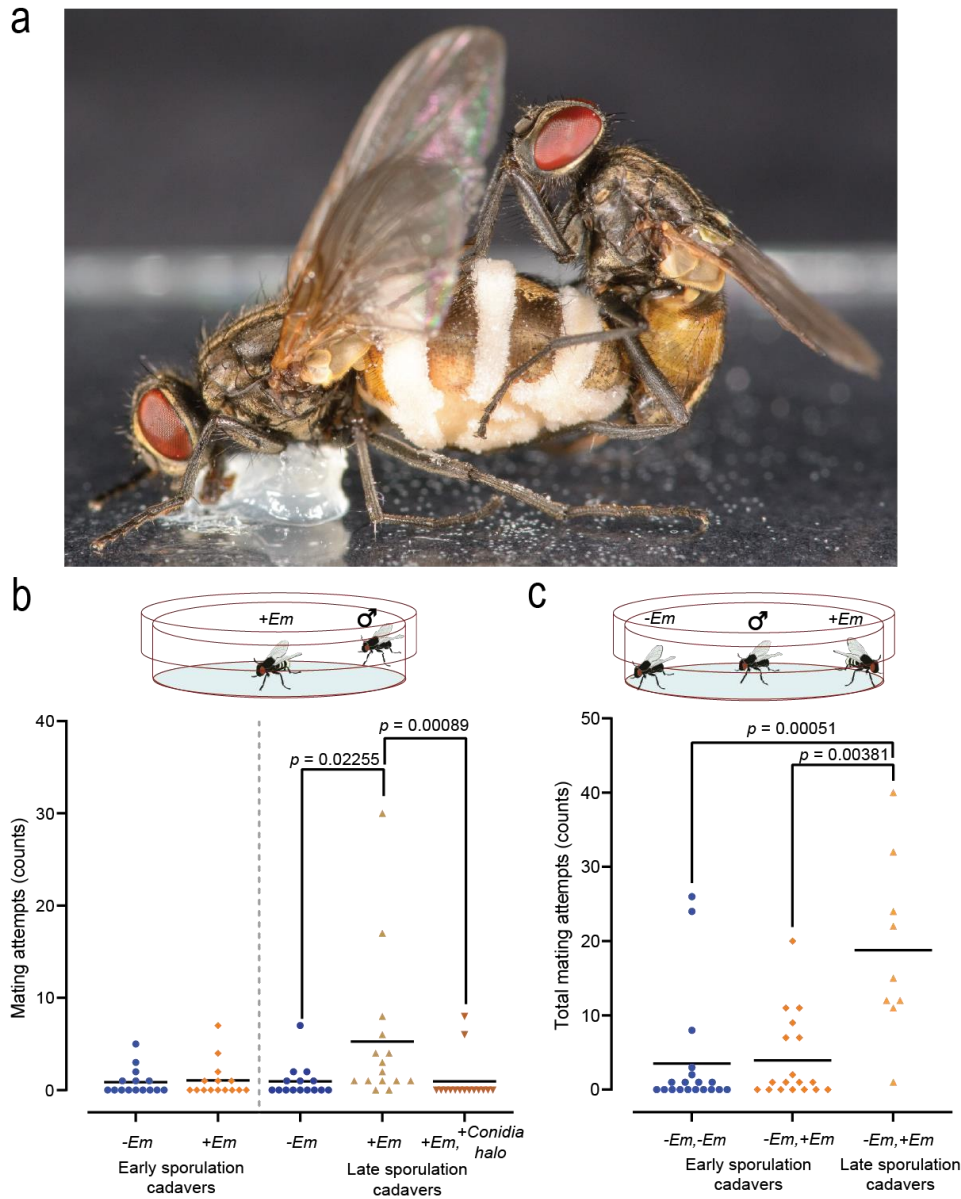

804

805 **Fig. 1| Male house fly mating attempts towards *E. muscae* cadavers.** **a**, Healthy male house fly  
 806 attempting to mate with *E. muscae* sporulating cadaver. Fungal growth is seen as white bands (conidiophores  
 807 with conidia) extruding from the abdomen of the dead female. The actively discharged conidia are covering  
 808 large parts of the wings and body of the female cadaver and also create a halo of conidia around the cadaver  
 809 (Photo: Filippo Castelucci). **b**, Male mating attempts towards uninfected freeze-killed (-Em) or infected  
 810 (+Em) *E. muscae*-killed cadavers in early (3-8 hours post death) and late (26-28 hours post death)  
 811 sporulation stages (n = 15 per treatment). **c**, Total mating attempts by a male towards either cadaver when  
 812 given a choice between two female cadavers that both were either uninfected (-Em, -Em), one uninfected  
 813 and one infected in early sporulation stage (-Em, +Em), or one uninfected and one infected in late  
 814 sporulation stage (-Em, +Em) (n = 9-19 per treatment).

815

816



817

Figure 2

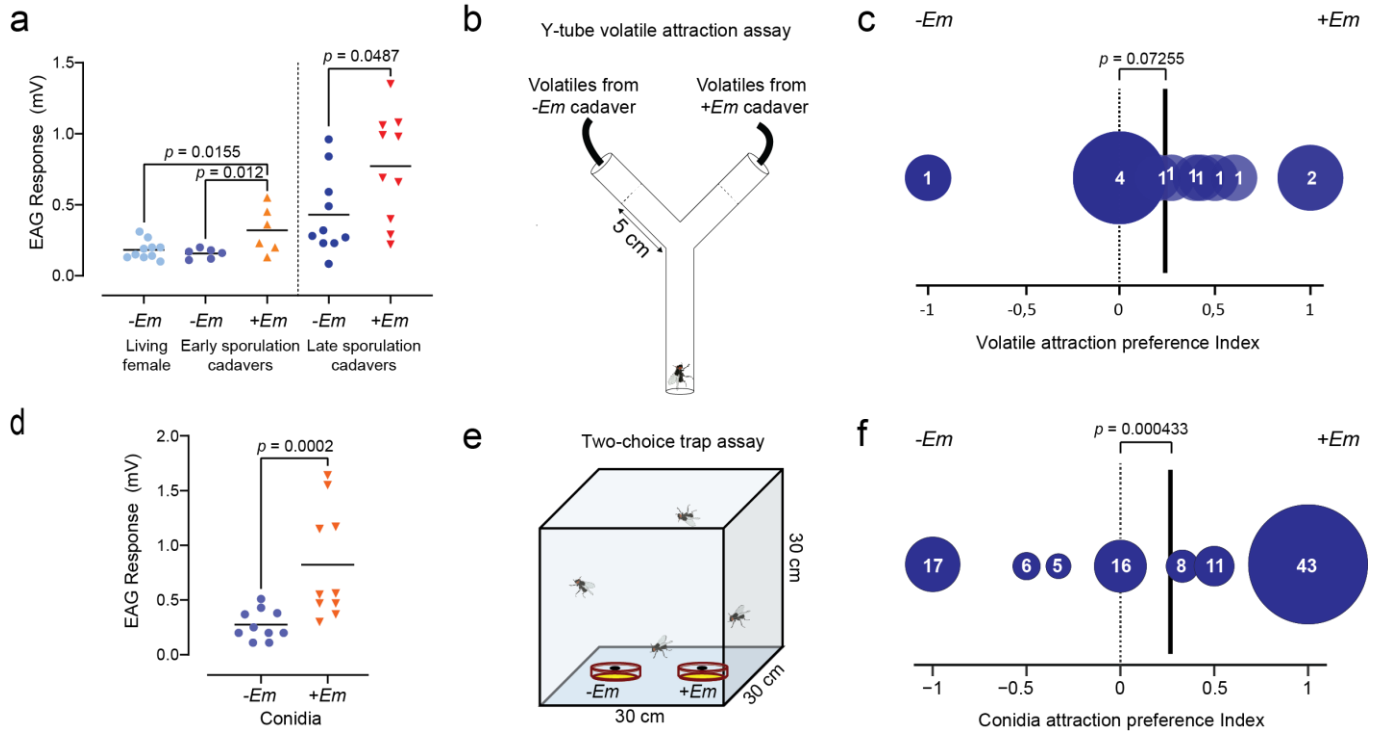

818

819

820

821 **Fig. 2| Antennal and behavioural responses to *E. muscae* volatile compounds.** **a**, Male antennal EAG  
 822 responses (mV) to volatile chemical blends of uninfected (-Em) or infected (+Em) *E. muscae*-killed cadavers  
 823 in early (3-8 hours post death) and late (26-28 hours post death) sporulation stages (n = 6-10 per treatment).  
 824 **b**, Drawing of Y-tube assay set-up. When the test fly reached 5 cm into either arm a choice was noted. **c**.  
 825 Preference index of male housefly attraction in Y-tube experiments to volatile blends from *E. muscae*  
 826 infected female cadavers (+Em) vs. volatiles from uninfected control female cadavers (-Em). Size of circles  
 827 and numbers within show number of one-hour trials resulting in a given preference index (n = 3-12 male  
 828 flies per trial, in total n = 90 flies). Solid black vertical lines designate mean preference index. **d**, Male  
 829 antennal EAG responses (mV) to volatile chemical blends from *E. muscae* conidia and control (n = 10). **e**.  
 830 Drawing of conidia attraction assay. **f**. Preference index of housefly attraction to volatile chemicals being  
 831 emitted from visually obstructed sticky-traps with (+Em) and without *E. muscae* conidia (-Em). Size of  
 832 circles and numbers within show number of 24-hour trials resulting in a given preference index (n = 4 male  
 833 or female houseflies per trial, in total n = 106 trials / 424 flies tested).

834

Figure 3

**a**

| Tentatively identified compound                | KI (DB-1) | ♀ +Em Early |      | ♀ +Em Late |      | ♂ +Em Early |      | ♂ +Em Late |   | ♀ +Em Conidia | ♂ +Em Conidia |
|------------------------------------------------|-----------|-------------|------|------------|------|-------------|------|------------|---|---------------|---------------|
|                                                |           | ♀           | ♂    | ♀          | ♂    | ♀           | ♂    | ♀          | ♂ |               |               |
| 1-Undecyl acetate                              | 1484.9    | -           | +    | -          | +    | +           | +    | -          | - | -             | -             |
| 1-Tetradecanol                                 | 1651.8    | -           | +    | -          | +    | +           | +    | -          | - | -             | -             |
| 1-Octadecanol                                  | 2060.1    | -           | ++   | -          | ++   | ++          | ++   | -          | - | -             | -             |
| Heneicosane                                    | 2094.3    | -           | -    | -          | 1.92 | 13.60       | -    | -          | - | -             | -             |
| Tetradecyl hexanoate                           | 2160.7    | ++          | ++   | ++         | ++   | ++          | ++   | -          | - | -             | -             |
| Octadecyl isocyanate                           | 2171.6    | -           | -    | -          | -    | -           | ++   | ++         | - | -             | -             |
| 1-Octadecyl acetate                            | 2184.0    | ++          | ++   | ++         | ++   | ++          | ++   | ++         | - | -             | -             |
| Tricosene                                      | 2268.6    | -           | +    | -          | -    | -           | -    | -          | - | -             | -             |
| Tricosane                                      | 2301.1    | 2.46        | 4.60 | 1.17       | 0.92 | -           | -    | -          | - | -             | -             |
| Tetradecyl octanoate                           | 2355.0    | ++          | ++   | ++         | ++   | ++          | ++   | ++         | - | -             | -             |
| Hexadecyl hexanoate                            | 2359.1    | ++          | ++   | +          | ++   | ++          | ++   | ++         | - | -             | -             |
| Octadecyl butyrate                             | 2365.9    | ++          | ++   | ++         | ++   | ++          | ++   | ++         | - | -             | -             |
| 1-Eicosyl acetate                              | 2386.0    | +           | ++   | +          | ++   | ++          | ++   | ++         | - | -             | -             |
| Tetracosane                                    | 2393.6    | +           | ++   | 4.17       | 3.14 | -           | -    | -          | - | -             | -             |
| Pentacosene                                    | 2477.3    | -           | -    | ++         | +    | -           | -    | -          | - | -             | -             |
| Pentacosane                                    | 2493.4    | 1.87        | 2.84 | 0.94       | 0.84 | -           | +    | -          | - | -             | -             |
| 9-, 11-, 13-Methylpentacosanes*                | 2531.8    | -           | -    | -          | -    | -           | -    | -          | - | -             | -             |
| Hexadecyl octanoate                            | 2556.2    | ++          | ++   | ++         | ++   | ++          | ++   | ++         | - | -             | -             |
| Octadecyl hexanoate                            | 2561.7    | ++          | ++   | ++         | ++   | ++          | ++   | ++         | - | -             | -             |
| 3-Methylpentacosane                            | 2569.1    | -           | -    | -          | -    | -           | -    | -          | - | -             | -             |
| 5,9-Dimethylpentacosane                        | 2580.1    | -           | -    | -          | -    | -           | -    | -          | - | -             | -             |
| 1-Docosyl acetate                              | 2586.5    | +           | ++   | +          | +    | +           | +    | +          | - | -             | -             |
| Hexacosane                                     | 2594.9    | 5.21        | 5.13 | 2.66       | 2.55 | -           | -    | -          | - | -             | -             |
| 3,7-3,9-, 3,11-, 3,13-Dimethylpentacosane*     | 2606.7    | -           | -    | -          | -    | -           | -    | -          | - | -             | -             |
| 10-, 12-, 13-Methylhexacosane*                 | 2631.8    | -           | -    | -          | -    | -           | -    | -          | - | -             | -             |
| 2-Methylhexacosane                             | 2659.6    | 2.24        | -    | -          | -    | -           | -    | -          | - | -             | -             |
| Heptacosene                                    | 2672.8    | 2.08        | 2.92 | 1.60       | 1.38 | -           | ++   | -          | - | -             | -             |
| Heptacosane                                    | 2696.9    | 1.27        | 1.83 | 0.95       | 0.84 | -           | -    | -          | - | -             | -             |
| 9-, 11-, 13-Methylheptacosane*                 | 2729.4    | 0.43        | 0.39 | 3.66       | -    | -           | -    | -          | - | -             | -             |
| 7-Methylheptacosane                            | 2740.0    | 0.93        | 0.57 | 1.82       | -    | -           | -    | -          | - | -             | -             |
| Octadecyl octanoate                            | 2757.3    | ++          | ++   | ++         | +++  | +++         | ++   | ++         | - | -             | -             |
| 9,13-, 11,15-Dimethylheptacosane*              | 2761.0    | -           | -    | -          | -    | -           | -    | -          | - | -             | -             |
| 2-Methylheptacosane                            | 2761.1    | -           | -    | -          | -    | -           | -    | -          | - | -             | -             |
| 5,9-Dimethylheptacosane                        | 2779.5    | 0.26        | 0.62 | -          | -    | -           | -    | -          | - | -             | -             |
| Octacosane                                     | 2794.7    | 1.37        | 1.98 | 6.04       | 8.62 | -           | -    | -          | - | -             | -             |
| 3,7-, 3,9-, 3,11-Dimethylheptacosanes*         | 2805.9    | 0.21        | 0.53 | -          | -    | -           | -    | -          | - | -             | -             |
| Squalene                                       | 2814.9    | +           | +    | +          | +    | +           | +    | +          | - | -             | -             |
| 12-, 13-, 14-Methyloctacosanes*                | 2827.5    | 0.34        | 0.79 | -          | -    | -           | -    | -          | - | -             | -             |
| 4-, 6-, 8-, 10-Methyloctacosanes*              | 2835.9    | 0.20        | 0.53 | -          | -    | -           | -    | -          | - | -             | -             |
| 2-Methyloctacosane                             | 2859.5    | 0.81        | 1.47 | -          | -    | -           | -    | -          | - | -             | -             |
| Nonacosene                                     | 2872.6    | 1.62        | 2.64 | 1.56       | 1.41 | -           | -    | -          | - | -             | -             |
| Nonacosane                                     | 2894.6    | 0.66        | 1.08 | 1.74       | 1.95 | -           | -    | -          | - | -             | -             |
| 9-, 11-, 13-, 15-Methylnonacosane*             | 2929.4    | 0.60        | 0.85 | -          | -    | -           | -    | -          | - | -             | -             |
| 7-Methylnonacosane                             | 2936.1    | 0.56        | 0.71 | 7.44       | -    | -           | -    | -          | - | -             | -             |
| 5-Methylnonacosane                             | 2948.3    | -           | -    | -          | -    | -           | -    | -          | - | -             | -             |
| Myristyl myristate                             | 2951.8    | ++          | +++  | ++         | +++  | +++         | +++  | +++        | - | -             | -             |
| 3-Methylnonacosane                             | 2971.8    | 0.50        | 0.72 | 5.40       | 6.79 | -           | -    | -          | - | -             | -             |
| Triacontane                                    | 2994.8    | 1.19        | 2.20 | +          | ++   | -           | -    | -          | - | -             | -             |
| 3,7-, 3,9-, 3,11-, 3,13-Dimethylnonacosanes*   | 3003.2    | 0.38        | 0.79 | -          | -    | -           | -    | -          | - | -             | -             |
| 10-, 12-Methyltriacontanes*                    | 3027.8    | 1.52        | 2.08 | -          | -    | -           | -    | -          | - | -             | -             |
| 8-Methyltriacontane                            | 3034.2    | 0.75        | 0.54 | -          | -    | -           | -    | -          | - | -             | -             |
| 2-, 4-Methyltriacontanes*                      | 3059.5    | 1.17        | 1.47 | 1.48       | 2.38 | -           | -    | -          | - | -             | -             |
| Hentriacontene                                 | 3074.1    | 1.80        | 2.31 | 2.31       | 3.97 | -           | -    | -          | - | -             | -             |
| Hentriacontane                                 | 3096.4    | 1.41        | 2.03 | 1.14       | 2.24 | -           | -    | -          | - | -             | -             |
| 7-Methylhentriacontane                         | 3137.7    | 2.22        | -    | -          | -    | -           | -    | -          | - | -             | -             |
| 5-Methylhentriacontane                         | 3149.7    | -           | -    | -          | -    | -           | -    | -          | - | -             | -             |
| 3-Methylhentriacontane                         | 3172.3    | 1.33        | 1.75 | 1.50       | 1.66 | -           | -    | -          | - | -             | -             |
| Dotriacontane                                  | 3200.2    | 3.78        | 1.40 | -          | -    | -           | -    | -          | - | -             | -             |
| 2-Methyldotriacontane                          | 3260.1    | 1.38        | 2.55 | -          | -    | -           | -    | -          | - | -             | -             |
| Tritriacontene                                 | 3275.9    | 3.49        | 5.30 | 1.96       | 6.23 | -           | -    | -          | - | -             | -             |
| Tritriacontane                                 | 3296.6    | 2.62        | 4.43 | 0.96       | 6.50 | -           | -    | -          | - | -             | -             |
| 11,15-, 13,17-, 15,19-Dimethyltritriacontanes* | 3356.6    | -           | -    | -          | -    | -           | -    | -          | - | -             | -             |
| 9-Methyltritriacontane                         | 3365.7    | 3.31        | -    | -          | -    | -           | -    | -          | - | -             | -             |
| Octadecyl tetradecanoate                       | 3376.7    | ++          | +++  | ++         | +++  | ++++        | ++++ | ++++       | - | -             | -             |
| Pentatriacontene                               | 3477.6    | +           | +    | -          | -    | -           | -    | -          | - | -             | -             |
| 11-, 13-, 15-, 17-Methylpentatriacontanes*     | 3533.6    | 2.34        | -    | -          | -    | -           | -    | -          | - | -             | -             |
| 11-, 13-Methylheptatriacontanes*               | 3728.7    | 2.39        | 8.90 | ++         | -    | -           | -    | -          | - | -             | -             |
| Hexadecyl eicosanoate                          | 3767.4    | -           | +++  | +++        | +++  | +++         | +++  | +++        | - | -             | -             |

\*Peaks with multiple compounds were individually tentatively identified by library searches against a NIST14 library and by comparison of Kovats indices, mass spectra and diagnostic ions to previously published analyses (see text for details).

Compounds only in ♂♀+Em cadavers
  Compounds only in ♂♀-Em cadavers
  Increased compounds in ♀+Em cadavers
  Decreased compounds in ♀+Em cadavers

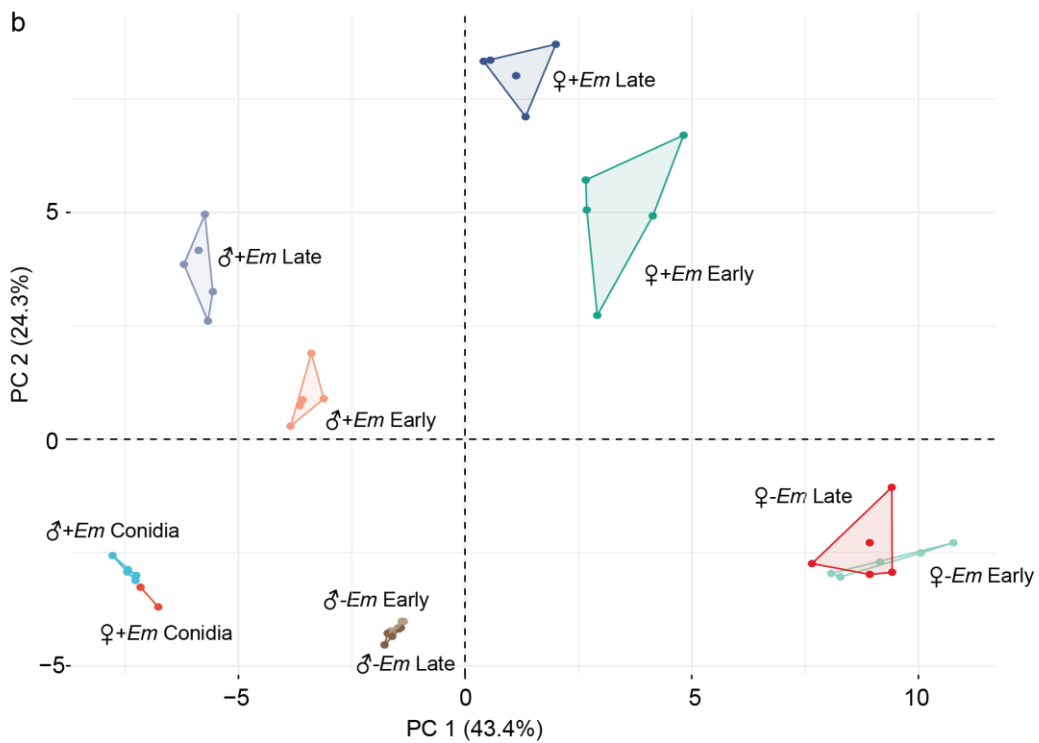

835

836

837 **Fig. 3| Cuticular chemical profile of *E. muscae* sporulating house flies. a**, Tentatively identified  
838 compounds in cuticular hexane extracts of early (3-8 hours post death) and late (26-28 hours post death)  
839 female and male sporulating cadavers and conidia. Numbers denote fold change in intensity of total ion  
840 chromatogram (TIC) compared to corresponding uninfected controls, whereas + denotes presence in the  
841 sample, but not in corresponding control (+:  $< 5.5 \times 10^7$ , ++:  $5.51 \times 10^7 < 5.5 \times 10^8$ , +++:  $5.51 \times 10^8 < 5.5 \times 10^9$ ,  
842 ++++  $> 5.51 \times 10^9$ ), and – denotes absence (i.e. only found in uninfected control samples). Compounds are  
843 colour coded whether they increase (green) or decrease (grey) in female +*Em* cadavers, or exclusively are  
844 found in +*Em* (blue) or –*Em* (white) cadavers. For each compound the retention index (KI, DB-1 column) is  
845 given. **b**, Principal component analysis (PCA) of cuticular and conidia extracts (hexane) shown in **a**.

846

847

848

Figure 4

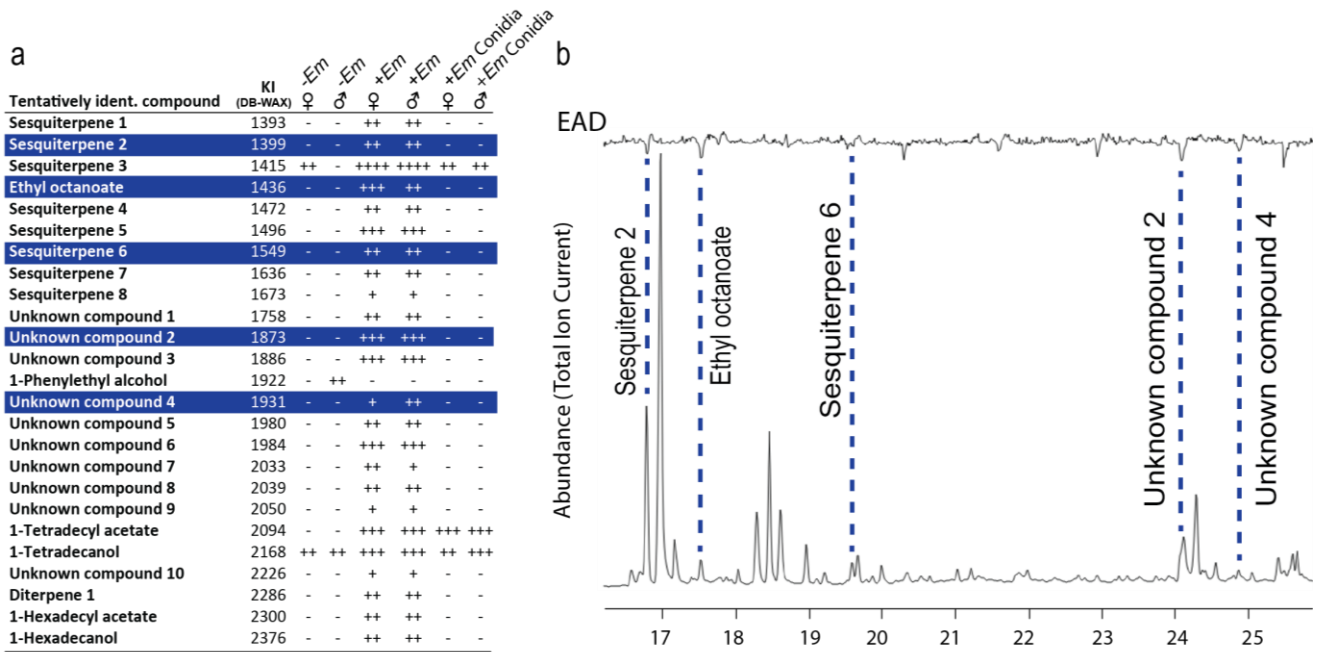

849  
850

851

852 **Fig. 4| Volatile chemical profile of *E. muscae* cadavers and male antennal detection.** **a**, Tentatively  
853 identified compounds found in volatile samples of uninfected (-Em) and infected (+Em) male and female  
854 cadavers sampled by collecting the ambient air (headspace) of cadavers or conidia over 24 hours. **b**, Male  
855 antennal detection of individual volatiles from infected female cadaver separated and detected using GC-  
856 EAD. Top: male antennal EAD response. Bottom: GC-FID separation of volatile compounds. Compounds  
857 marked in blue (**a**) correspond to volatile compounds highlighted with stippled lines that consistently gave an  
858 EAD response in all replicates.

859

860

861

862

Figure 5

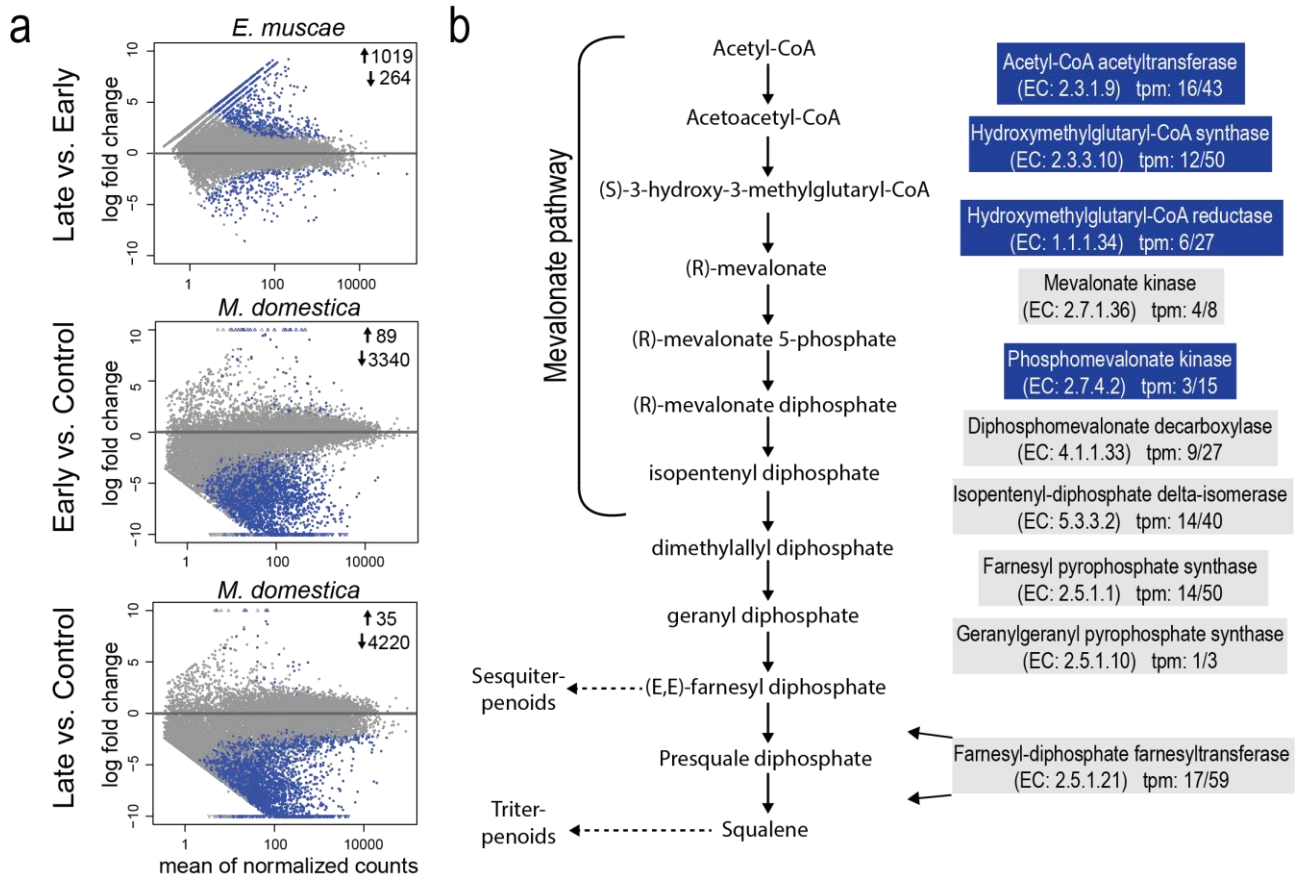

863

864

865 **Fig. 5| Housefly and *E. muscae* gene expression during sporulation in fungus-killed cadavers. a.**  
 866 Expressed *E. muscae* transcripts in late (26-28 hours post death) vs. early (3-8 hours post death) cadavers,  
 867 and housefly expressed transcripts in early infected vs. uninfected early controls, and late cadavers vs. late  
 868 controls (MA-plots). Blue dots show significantly higher or lower expressed genes (Log2 fold-change > 1; p  
 869 < 0.001). b. All enzymes in the fungal mevalonate and sesquiterpene biosynthesis pathway were identified  
 870 and expressed in *E. muscae*. Blue-coloured boxes denote enzyme-coding genes significantly higher  
 871 expressed in late vs. early sporulating cadavers (Log2 fold-change > 1; p < 0.001). For each enzyme the  
 872 Enzyme Commission (EC) number and expression in transcripts per million (tpm) in early / late sporulation  
 873 is given.

874

875

a

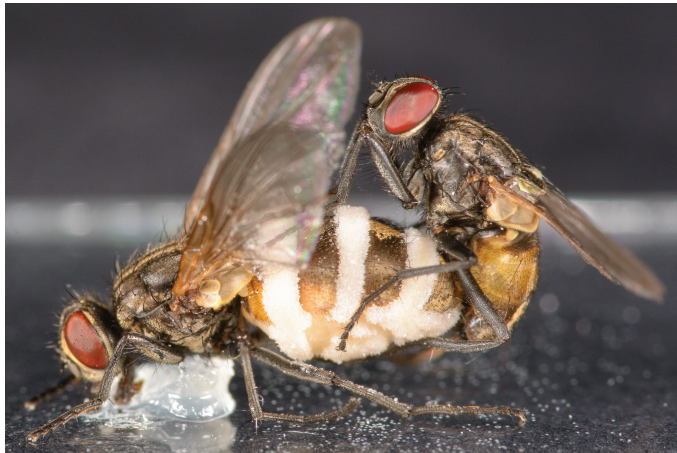

b

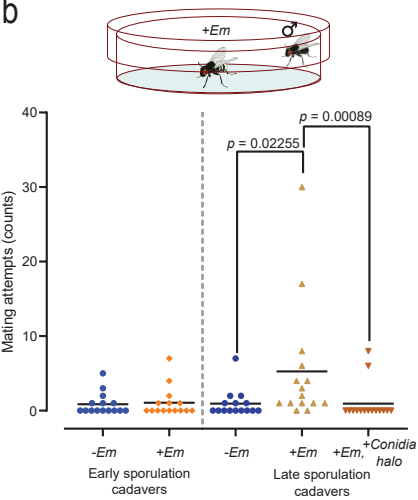

c

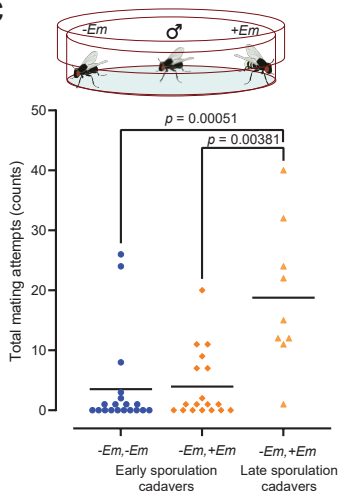



**a**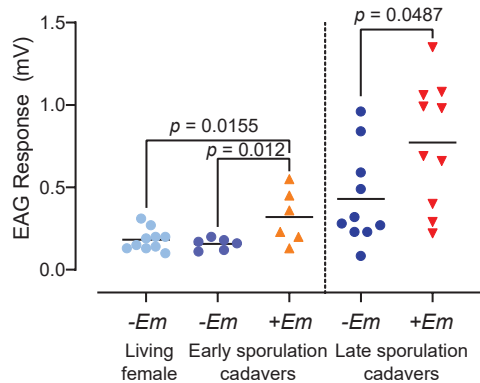**b**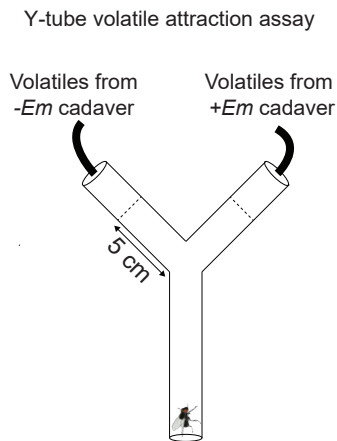**c**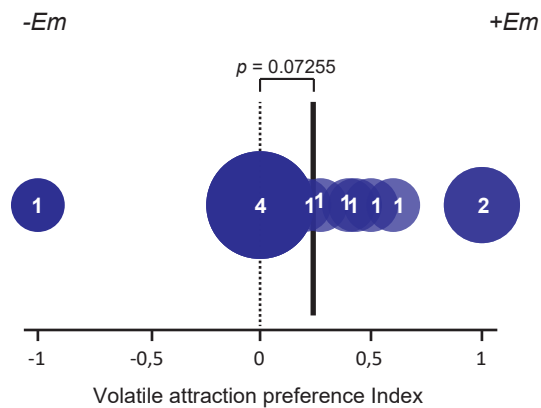**d**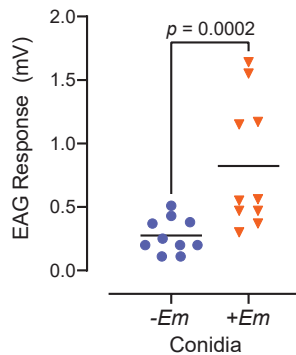**e**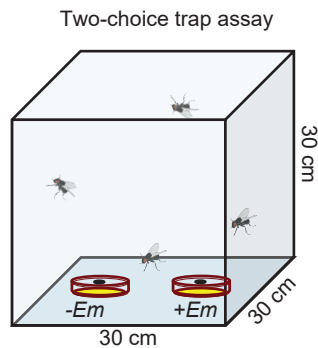**f**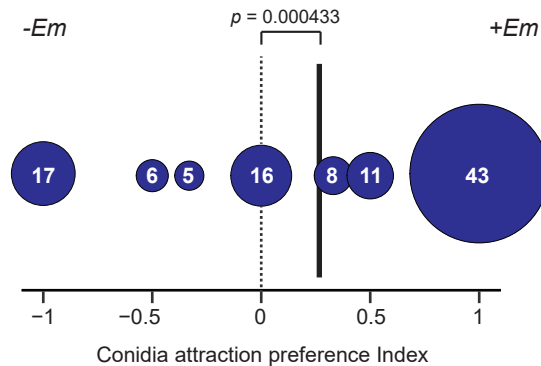

**a**

| Tentative identified compound               | KI (DB-1) | ♀ +Em Early |      | ♀ +Em Late |       | ♂ +Em Early |    | ♂ +Em Late |   | ♀ +Em Conidia |   | ♂ +Em Conidia |   |
|---------------------------------------------|-----------|-------------|------|------------|-------|-------------|----|------------|---|---------------|---|---------------|---|
|                                             |           | ♀           | ♂    | ♀          | ♂     | ♀           | ♂  | ♀          | ♂ | ♀             | ♂ | ♀             | ♂ |
| 1-Undecyl acetate                           | 1484.9    | -           | +    | -          | +     | +           | +  |            |   |               |   |               |   |
| 1-Tetradecanol                              | 1651.8    | -           | +    | -          | +     | +           | +  |            |   |               |   |               |   |
| 1-Octadecanol                               | 2060.1    | -           | ++   | -          | ++    | ++          | ++ |            |   |               |   |               |   |
| Heptacosane                                 | 2094.3    | -           | -    | 1.92       | 13.60 | -           | -  |            |   |               |   |               |   |
| Tetradecyl hexanoate                        | 2160.7    | ++          | ++   | ++         | ++    | -           | -  |            |   |               |   |               |   |
| Octadecyl isocyanate                        | 2171.6    | -           | -    | -          | -     | -           | ++ | ++         |   |               |   |               |   |
| 1-Octadecyl acetate                         | 2184.0    | ++          | ++   | ++         | ++    | ++          | ++ |            |   |               |   |               |   |
| Tricosene                                   | 2268.6    | -           | +    | -          | +     | -           | -  |            |   |               |   |               |   |
| Tricosane                                   | 2301.1    | 2.46        | 4.60 | 1.17       | 0.92  | -           | -  |            |   |               |   |               |   |
| Tetradecyl octanoate                        | 2355.0    | ++          | ++   | ++         | ++    | ++          | ++ |            |   |               |   |               |   |
| Hexadecyl hexanoate                         | 2359.1    | ++          | ++   | ++         | ++    | ++          | ++ |            |   |               |   |               |   |
| Octadecyl butyrate                          | 2365.9    | ++          | ++   | ++         | ++    | ++          | ++ |            |   |               |   |               |   |
| 1-Eicosyl acetate                           | 2386.0    | +           | ++   | +          | ++    | +           | +  |            |   |               |   |               |   |
| Tetracosane                                 | 2393.6    | +           | ++   | 4.17       | 3.14  | -           | -  |            |   |               |   |               |   |
| Pentacosene                                 | 2477.3    | -           | -    | ++         | +     | -           | -  |            |   |               |   |               |   |
| Pentacosane                                 | 2493.4    | 1.87        | 2.84 | 0.94       | 0.84  | -           | +  |            |   |               |   |               |   |
| 9-, 11-, 13-Methylpentacosanes*             | 2531.8    | -           | -    | -          | -     | -           | -  |            |   |               |   |               |   |
| Hexadecyl octanoate                         | 2556.2    | ++          | ++   | ++         | ++    | +           | +  |            |   |               |   |               |   |
| Octadecyl hexanoate                         | 2561.7    | ++          | ++   | ++         | ++    | +           | +  |            |   |               |   |               |   |
| 3-Methylpentacosane                         | 2569.1    | -           | -    | -          | -     | -           | -  |            |   |               |   |               |   |
| 5,9-Dimethylpentacosane                     | 2580.1    | -           | -    | -          | -     | -           | -  |            |   |               |   |               |   |
| 1-Docosyl acetate                           | 2586.5    | +           | ++   | +          | +     | +           | +  |            |   |               |   |               |   |
| Hexacosane                                  | 2594.9    | 5.21        | 5.13 | 2.66       | 2.55  | -           | -  |            |   |               |   |               |   |
| 3,7- 3,9-, 3,11-, 3,13-Dimethylpentacosane* | 2606.7    | -           | -    | -          | -     | -           | -  |            |   |               |   |               |   |
| 10-, 12-, 13-Methylhexacosane*              | 2631.8    | -           | -    | -          | -     | -           | -  |            |   |               |   |               |   |
| 2-Methylhexacosane                          | 2659.6    | 2.24        | -    | -          | -     | -           | -  |            |   |               |   |               |   |
| Heptacosene                                 | 2672.8    | 2.08        | 2.92 | 1.60       | 1.38  | -           | ++ |            |   |               |   |               |   |
| Heptacosane                                 | 2696.9    | 1.27        | 1.83 | 0.95       | 0.84  | -           | -  |            |   |               |   |               |   |
| 9-, 11-, 13-Methylheptacosane*              | 2729.4    | 0.43        | 0.39 | 3.66       | -     | -           | -  |            |   |               |   |               |   |
| 7-Methylheptacosane                         | 2740.0    | 0.93        | 0.57 | 1.82       | -     | -           | -  |            |   |               |   |               |   |
| Octadecyl octanoate                         | 2757.3    | ++          | ++   | ++         | +++   | +           | ++ |            |   |               |   |               |   |
| 9,13-, 11,15-Dimethylheptacosane*           | 2761.0    | -           | -    | -          | -     | -           | -  |            |   |               |   |               |   |
| 2-Methylheptacosane                         | 2761.1    | -           | -    | -          | -     | -           | -  |            |   |               |   |               |   |
| 5,9-Dimethylheptacosane                     | 2779.5    | 0.26        | 0.62 | -          | -     | -           | -  |            |   |               |   |               |   |

  

| Tentative identified compound                | KI (DB-1) | ♀ +Em Early |      | ♀ +Em Late |      | ♂ +Em Early |      | ♂ +Em Late |   | ♀ +Em Conidia |   | ♂ +Em Conidia |   |
|----------------------------------------------|-----------|-------------|------|------------|------|-------------|------|------------|---|---------------|---|---------------|---|
|                                              |           | ♀           | ♂    | ♀          | ♂    | ♀           | ♂    | ♀          | ♂ | ♀             | ♂ | ♀             | ♂ |
| Octacosane                                   | 2794.7    | 1.37        | 1.98 | 6.04       | 8.62 | -           | -    |            |   |               |   |               |   |
| 3,7-, 3,9-, 3,11-Dimethylheptacosanes*       | 2805.9    | 0.21        | 0.53 | -          | -    | -           | -    |            |   |               |   |               |   |
| Squalene                                     | 2814.9    | +           | +    | +          | +    | +           | +    |            |   |               |   |               |   |
| 12-, 13-, 14-Methyloctacosanes*              | 2827.5    | 0.34        | 0.79 | -          | -    | -           | -    |            |   |               |   |               |   |
| 4-, 6-, 8-, 10-Methyloctacosanes*            | 2835.9    | 0.20        | 0.53 | -          | -    | -           | -    |            |   |               |   |               |   |
| 2-Methyloctacosane                           | 2859.5    | 0.81        | 1.47 | -          | -    | -           | -    |            |   |               |   |               |   |
| Nonacosene                                   | 2872.6    | 1.62        | 2.64 | 1.56       | 1.41 | -           | -    |            |   |               |   |               |   |
| Nonacosane                                   | 2894.6    | 0.66        | 1.08 | 1.74       | 1.95 | -           | -    |            |   |               |   |               |   |
| 9-, 11-, 13-, 15-Methylnonacosane*           | 2929.4    | 0.60        | 0.85 | -          | -    | -           | -    |            |   |               |   |               |   |
| 7-Methylnonacosane                           | 2936.1    | 0.56        | 0.71 | 7.44       | -    | -           | -    |            |   |               |   |               |   |
| 5-Methylnonacosane                           | 2948.3    | -           | -    | -          | -    | -           | -    |            |   |               |   |               |   |
| Myristyl myristate                           | 2951.8    | ++          | +++  | ++         | +++  | +++         | +++  |            |   |               |   |               |   |
| 3-Methylnonacosane                           | 2971.8    | 0.50        | 0.72 | 5.40       | 6.79 | -           | -    |            |   |               |   |               |   |
| Triacontane                                  | 2994.8    | 1.19        | 2.20 | +          | ++   | -           | -    |            |   |               |   |               |   |
| 3,7-, 3,9-, 3,11-, 3,13-Dimethylnonacosanes* | 3003.2    | 0.38        | 0.79 | -          | -    | -           | -    |            |   |               |   |               |   |
| 10-, 12-Methyltriacontanes*                  | 3027.8    | 1.52        | 2.08 | -          | -    | -           | -    |            |   |               |   |               |   |
| 8-Methyltriacontane                          | 3034.2    | 0.75        | 0.54 | -          | -    | -           | -    |            |   |               |   |               |   |
| 2-, 4-Methyltriacontanes*                    | 3059.5    | 1.17        | 1.47 | 1.48       | 2.38 | -           | -    |            |   |               |   |               |   |
| Hentriacontene                               | 3074.1    | 1.80        | 2.31 | 2.31       | 3.97 | -           | -    |            |   |               |   |               |   |
| Hentriacontane                               | 3096.4    | 1.41        | 2.03 | 1.14       | 2.24 | -           | -    |            |   |               |   |               |   |
| 7-Methylhentriacontane                       | 3137.7    | 2.22        | -    | -          | -    | -           | -    |            |   |               |   |               |   |
| 5-Methylhentriacontane                       | 3149.7    | -           | -    | -          | -    | -           | -    |            |   |               |   |               |   |
| 3-Methylhentriacontane                       | 3172.3    | 1.33        | 1.75 | 1.50       | 1.66 | -           | -    |            |   |               |   |               |   |
| Dotriacontane                                | 3200.2    | 3.78        | 1.40 | -          | -    | -           | -    |            |   |               |   |               |   |
| 2-Methyldotriacontane                        | 3260.1    | 1.38        | 2.55 | -          | -    | -           | -    |            |   |               |   |               |   |
| Tritriacontene                               | 3275.9    | 3.49        | 5.30 | 1.96       | 6.23 | -           | -    |            |   |               |   |               |   |
| Tritriacontane                               | 3296.6    | 2.62        | 4.43 | 0.96       | 6.50 | -           | -    |            |   |               |   |               |   |
| 11,15-, 13,17-, 15,19-Dimethyltriacontanes*  | 3356.6    | -           | -    | -          | -    | -           | -    |            |   |               |   |               |   |
| 3-Methyltriacontane                          | 3365.7    | 3.31        | -    | -          | -    | -           | -    |            |   |               |   |               |   |
| Octadecyl tetradecanoate                     | 3376.7    | ++          | +++  | ++         | +++  | ++++        | ++++ |            |   |               |   |               |   |
| Pentatriacontene                             | 3477.6    | +           | +    | -          | -    | -           | -    |            |   |               |   |               |   |
| 11-, 13-, 15-, 17-Methylpentatriacontanes*   | 3533.6    | 2.34        | -    | -          | -    | -           | -    |            |   |               |   |               |   |
| 11-, 13-Methylheptatriacontanes*             | 3728.7    | 2.39        | 8.90 | ++         | -    | -           | -    |            |   |               |   |               |   |
| Hexadecyl eicosanoate                        | 3767.4    | -           | +++  | -          | +++  | +++         | +++  |            |   |               |   |               |   |

\*Peaks with multiple compounds were individually tentatively identified by library searches against a NIST14 library and by comparison of Kovats indices, mass spectra and diagnostic ions to previously published analyses (see text for details).

Compounds only in ♂/♀+Em cadavers
  Compounds only in ♂/♀-Em cadavers
  Increased compounds in ♀+Em cadavers
  Decreased compounds in ♀+Em cadavers

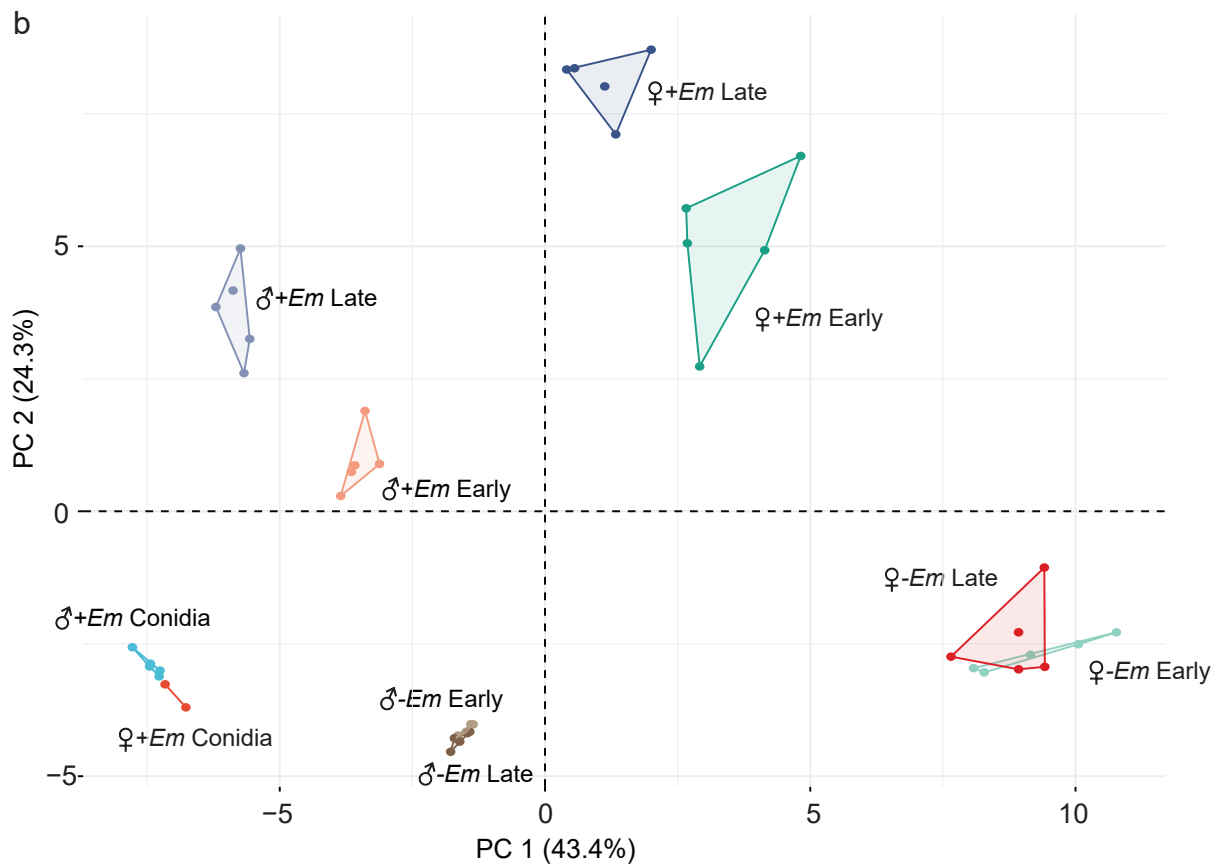

**a**

| tentatively ident. compound | KI<br>(DB-WAX) | -Em |    | +Em  |      | +Em Conidia |     |
|-----------------------------|----------------|-----|----|------|------|-------------|-----|
|                             |                | ♀   | ♂  | ♀    | ♂    | ♀           | ♂   |
| Sesquiterpene 1             | 1393           | -   | -  | ++   | ++   | -           | -   |
| Sesquiterpene 2             | 1399           | -   | -  | ++   | ++   | -           | -   |
| Sesquiterpene 3             | 1415           | ++  | -  | ++++ | ++++ | ++          | ++  |
| Ethyl octanoate             | 1436           | -   | -  | +++  | ++   | -           | -   |
| Sesquiterpene 4             | 1472           | -   | -  | ++   | ++   | -           | -   |
| Sesquiterpene 5             | 1496           | -   | -  | +++  | +++  | -           | -   |
| Sesquiterpene 6             | 1549           | -   | -  | ++   | ++   | -           | -   |
| Sesquiterpene 7             | 1636           | -   | -  | ++   | ++   | -           | -   |
| Sesquiterpene 8             | 1673           | -   | -  | +    | +    | -           | -   |
| Unknown compound 1          | 1758           | -   | -  | ++   | ++   | -           | -   |
| Unknown compound 2          | 1873           | -   | -  | +++  | +++  | -           | -   |
| Unknown compound 3          | 1886           | -   | -  | +++  | +++  | -           | -   |
| 1-Phenylethyl alcohol       | 1922           | -   | ++ | -    | -    | -           | -   |
| Unknown compound 4          | 1931           | -   | -  | +    | ++   | -           | -   |
| Unknown compound 5          | 1980           | -   | -  | ++   | ++   | -           | -   |
| Unknown compound 6          | 1984           | -   | -  | +++  | +++  | -           | -   |
| Unknown compound 7          | 2033           | -   | -  | ++   | +    | -           | -   |
| Unknown compound 8          | 2039           | -   | -  | ++   | ++   | -           | -   |
| Unknown compound 9          | 2050           | -   | -  | +    | +    | -           | -   |
| 1-Tetradecyl acetate        | 2094           | -   | -  | +++  | +++  | +++         | +++ |
| 1-Tetradecanol              | 2168           | ++  | ++ | +++  | +++  | ++          | +++ |
| Unknown compound 10         | 2226           | -   | -  | +    | +    | -           | -   |
| Diterpene 1                 | 2286           | -   | -  | ++   | ++   | -           | -   |
| 1-Hexadecyl acetate         | 2300           | -   | -  | ++   | ++   | -           | -   |
| 1-Hexadecanol               | 2376           | -   | -  | ++   | ++   | -           | -   |

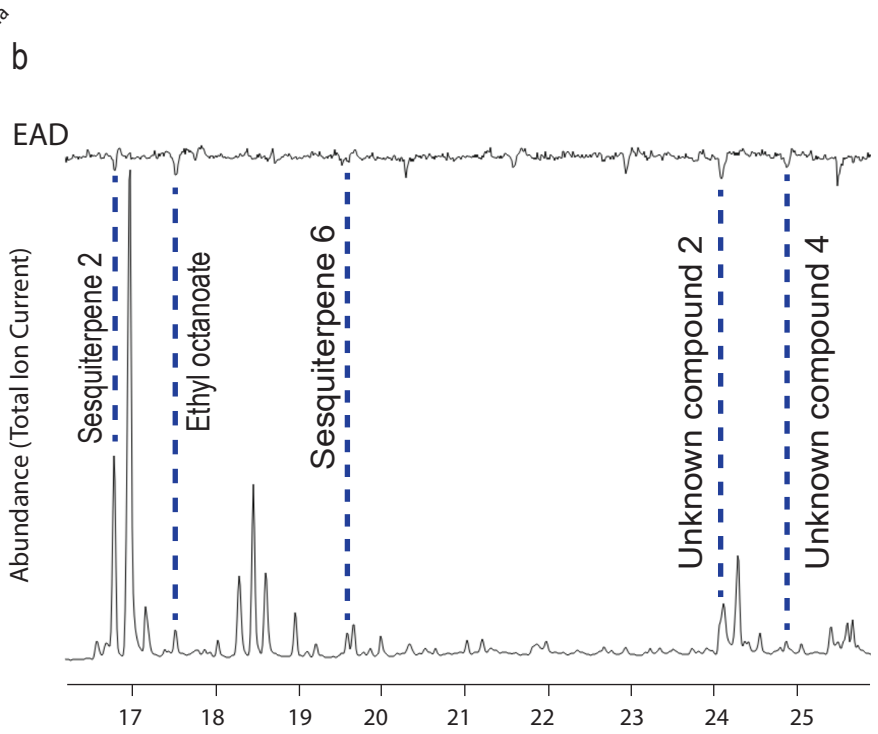

a

Late vs. Early

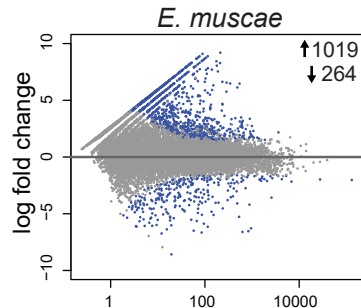

Early vs. Control

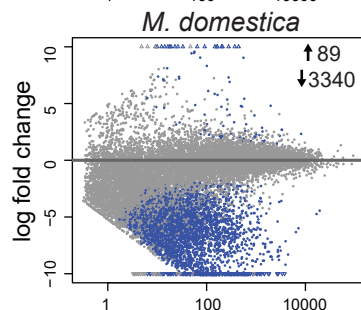

Late vs. Control

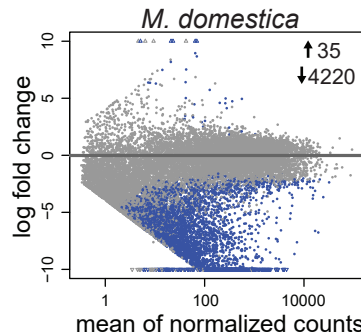

b

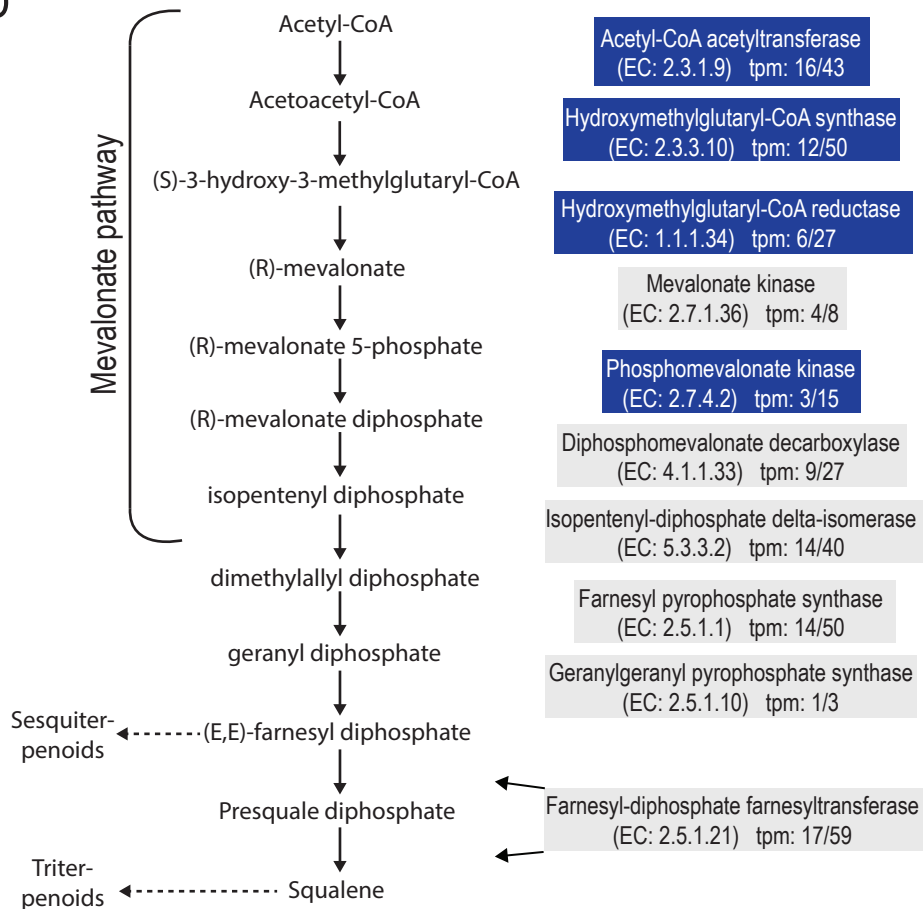

## Supplementary material:

# A pathogenic fungus uses volatiles to entice male flies into fatal matings with infected female cadavers

### Authors

Andreas Naundrup<sup>\*1</sup>, Björn Bohman<sup>2</sup>, Charles A. Kwadha<sup>2</sup>, Annette B. Jensen<sup>1</sup>, Paul G. Becher<sup>2</sup>, Henrik H. De Fine Licht<sup>\*1</sup>

<sup>1</sup>Section for Organismal Biology, Department of Plant and Environmental Science, University of Copenhagen, Denmark

<sup>2</sup>Department of Plant Protection Biology, Swedish University of Agricultural Sciences, Alnarp, Sweden

\*Author for correspondence: Email: ah@plen.ku.dk, Tel: +45 42408353, Email: hhdefinlicht@plen.ku.dk, Tel: +45 35320097, Address: Section for Organismal Biology, Department of Plant and Environmental Science, University of Copenhagen, Thorvaldsensvej 40, 1871 Frederiksberg, Denmark

### Supplementary Figure 1

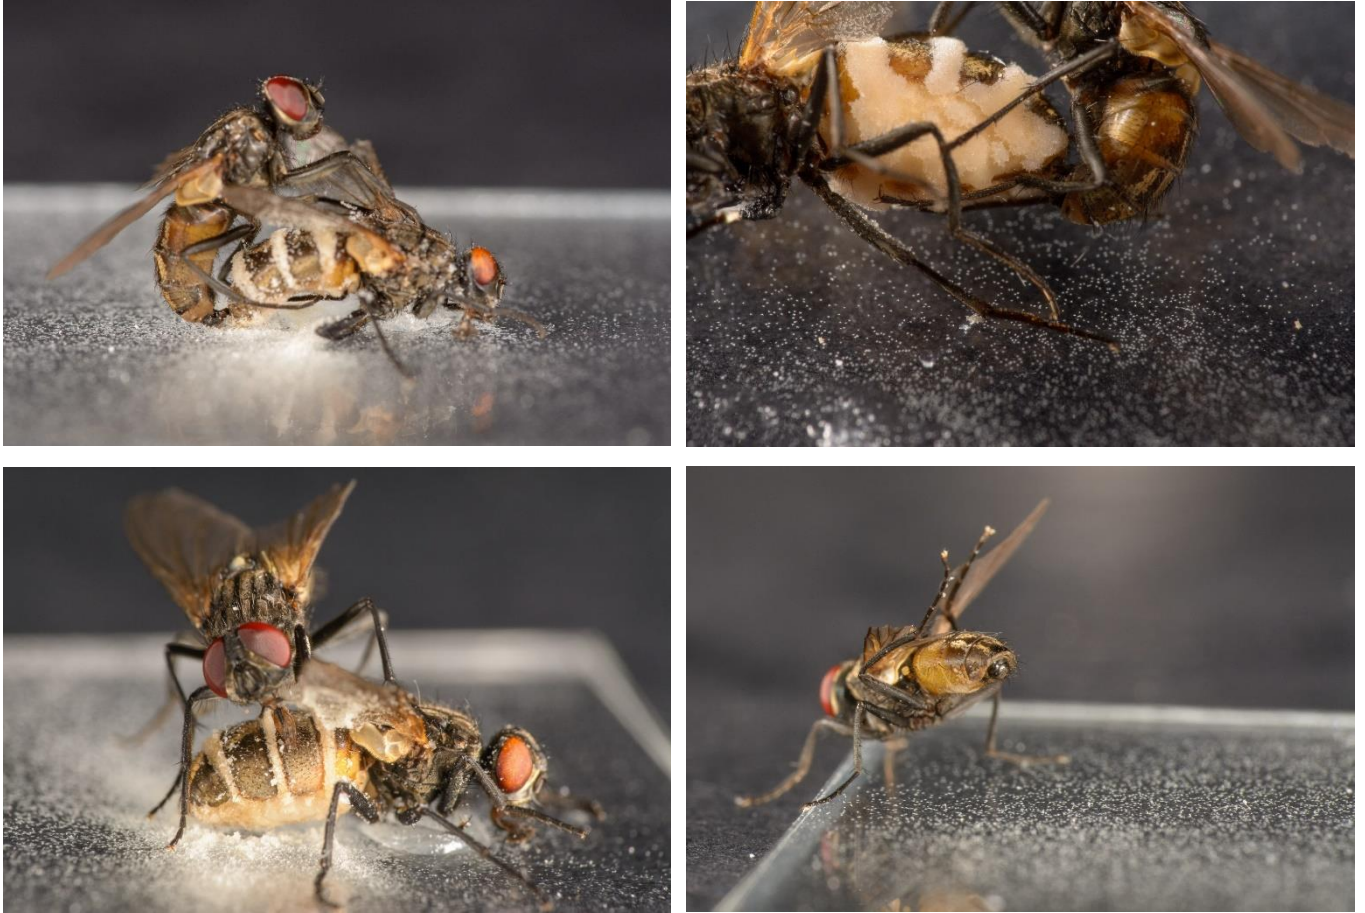

**Supplementary figure 1. Housefly behavior towards *E. muscae* sporulating cadavers.** **a.** A healthy, male housefly attempting copulation with an *E. muscae* sporulating housefly. **b.** Male attempting copulation with a sporulating female housefly. The male visibly extends his aedeagus to engage in mating. **c.** A housefly extending its proboscis and feeds on the sporulating cadaver. This behavior was exhibited towards both cadavers and conidia alone. The cadaver is fixated to the glass surface with a small amount of petroleum jelly (Vaseline) on its thorax. **d.** Healthy male housefly engaging in grooming behavior after being in contact with cadaver and conidia. Here, several conidia has already attached themselves to legs and abdomen. In all photos conidia can be seen as white powder primarily on surfaces and the cadaver, but also on the male's abdomen and legs. Photos: Fillipo Castelucci.



## Supplementary Figure 2

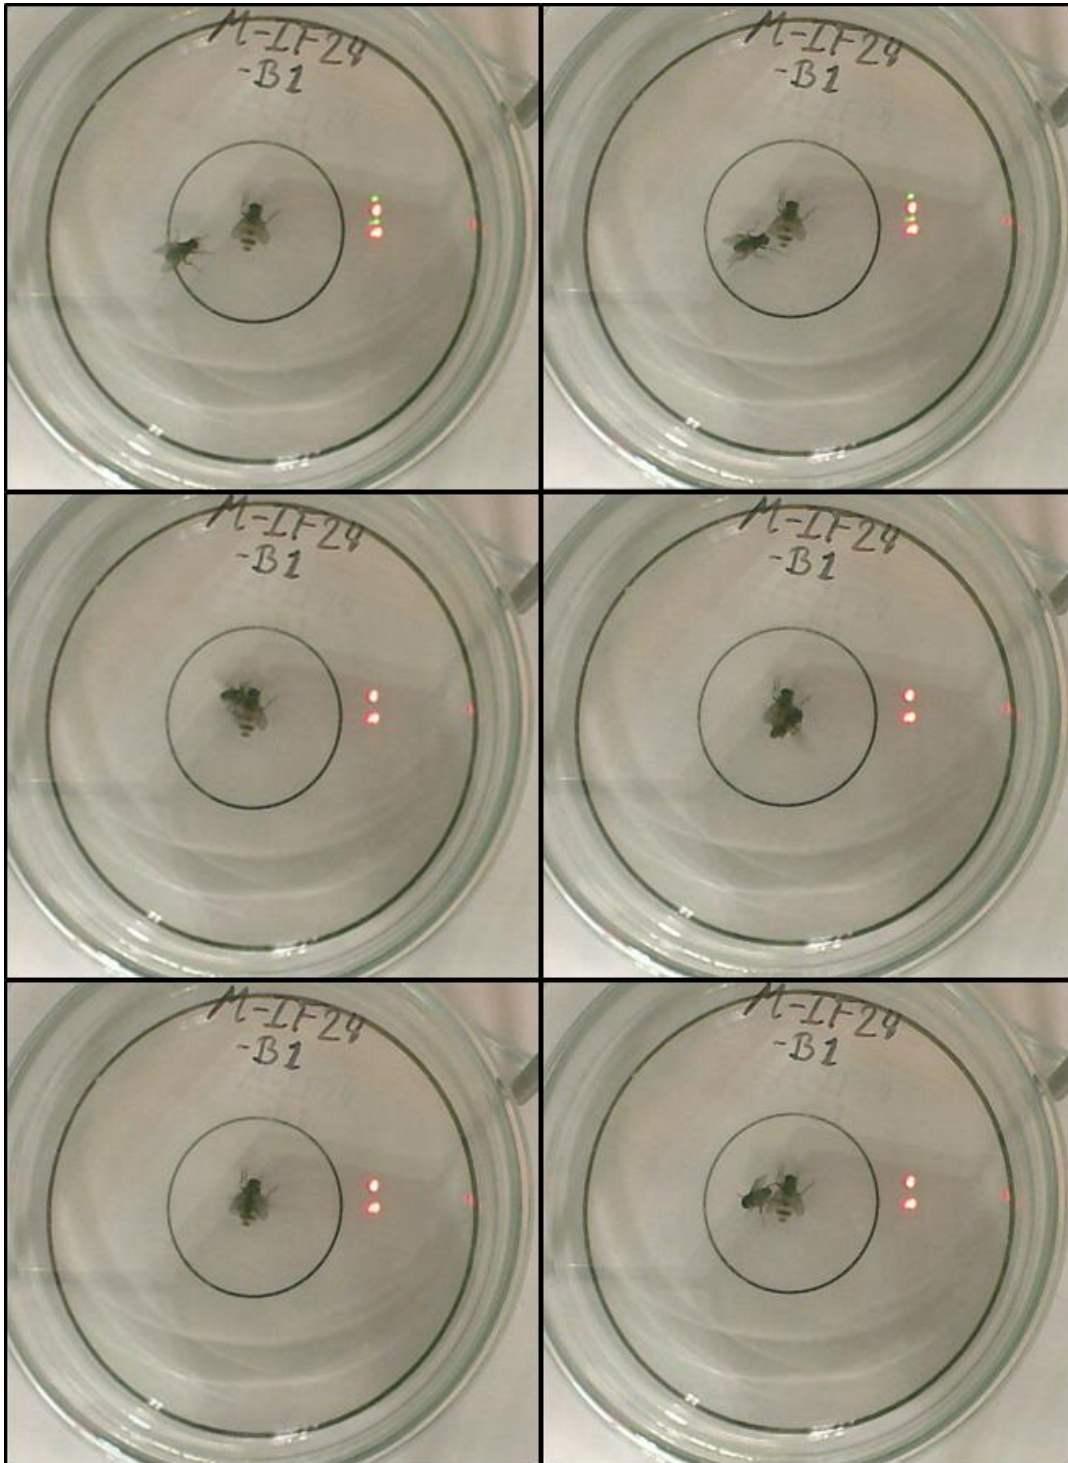

**Supplementary figure 2. A mating attempt as noted in the mating activity experiment.** A single cadaver is fixated in the center of a glass arena (Petri dish). The arena is placed on top of a printed sheet of paper, denoting the center (cadaver), an inner ring (radius = 16 mm), which denotes when the subject is “in vicinity” and an outer ring to indicate the outer borders of the arena. After acclimating to the arena, the male will usually first interact with the cadaver by physical contact. A mating attempt occurs when the male approaches the cadaver, usually from the sides or rear, and jumps onto the cadaver, accompanied by excessive wing flickering. Then he attempts to connect his aedeagus with the tip of the cadaver’s abdomen.

### Supplementary figure 3

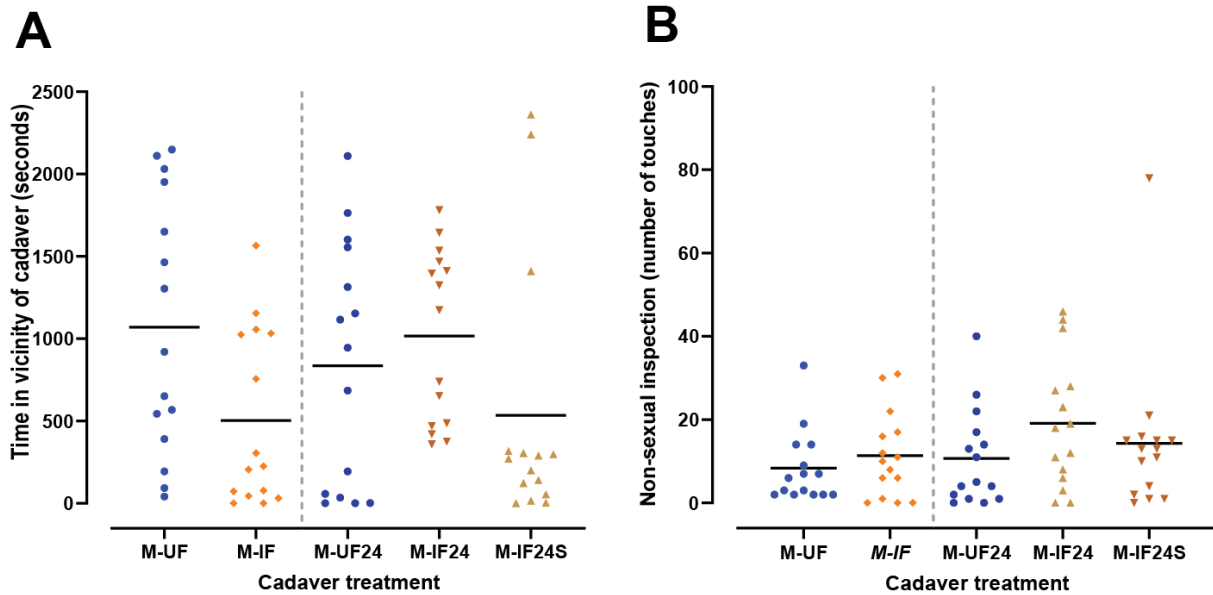

**Supplementary figure 3. Male behaviour towards female cadavers. A.** Time spend in vicinity of cadaver (radius: 16 mm). Male on uninfected female early control (M-UF, n =15), M-IF: Male on infected female, early sporulation stage (M-IF, n=15), Male on uninfected female, late control (M-UF24, n =15), Male on infected female, late sporulation stage (M-IF24, n = 15), Male on infected female, late sporulation stage with spores around the cadaver (M-IF24S, n = 15) **B.** Number of non-sexual physical cadaver inspections.

## Supplementary Figure 4

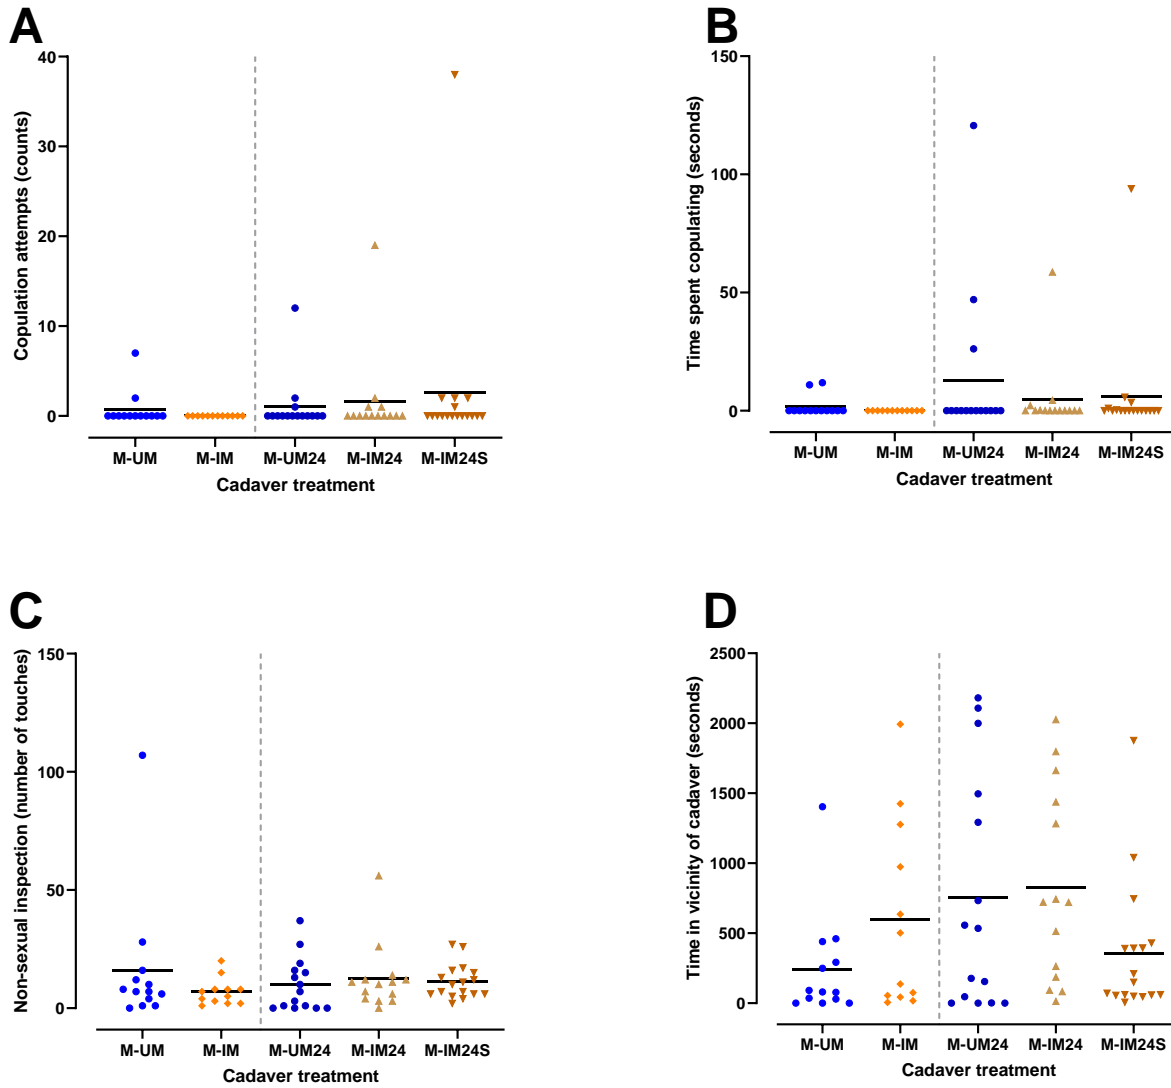

**Supplementary figure 4. Male on male mating behavior.** **A.** Number of mating attempts measured per trial. Male on uninfected male early control (M-UM, n=13), M-IM: Male on infected male, early sporulation stage (M-IM, n=12), Male on uninfected male, late control (M-UM24, n=15), Male on infected male, late sporulation stage (M-IF24, n=14), and Male on infected male, late sporulation stage with halo of conidia around the cadaver (M-IF24S, n=17) **B.** time spent mating (seconds) **c.** Non-sexual inspections (counts of touches), **d.** time spent in vicinity (radius: 16 mm) of the cadaver.

## Supplementary Figure 5

### 2-Choice copulation attempts

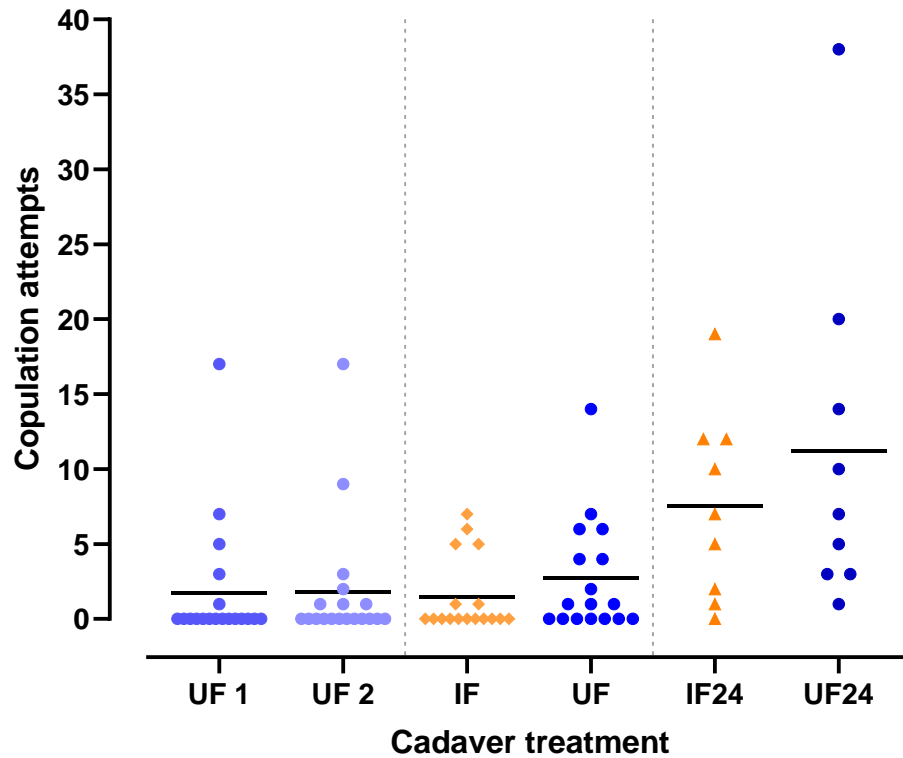

**Supplementary figure 5. Petri dish 2-choice experiment.** One male were allowed to choose between two female cadavers. In the first subset (left), two uninfected, freeze-killed controls were placed and named UF 1 & UF 2 (n = 19). In the second subset (middle), a male was allowed to choose between an uninfected female control (UF), and an *E. muscae* cadaver (IF) in an early sporulating stage (n = 17). In the last subset (right), a male was allowed to choose between a freeze-killed, uninfected control (UF24) and an *E. muscae* sporulating cadaver (IF24) in a late sporulation stage (n = 9). There was no significant differences in the amount of copulation attempts in either experiment.

### Supplementary Figure 6

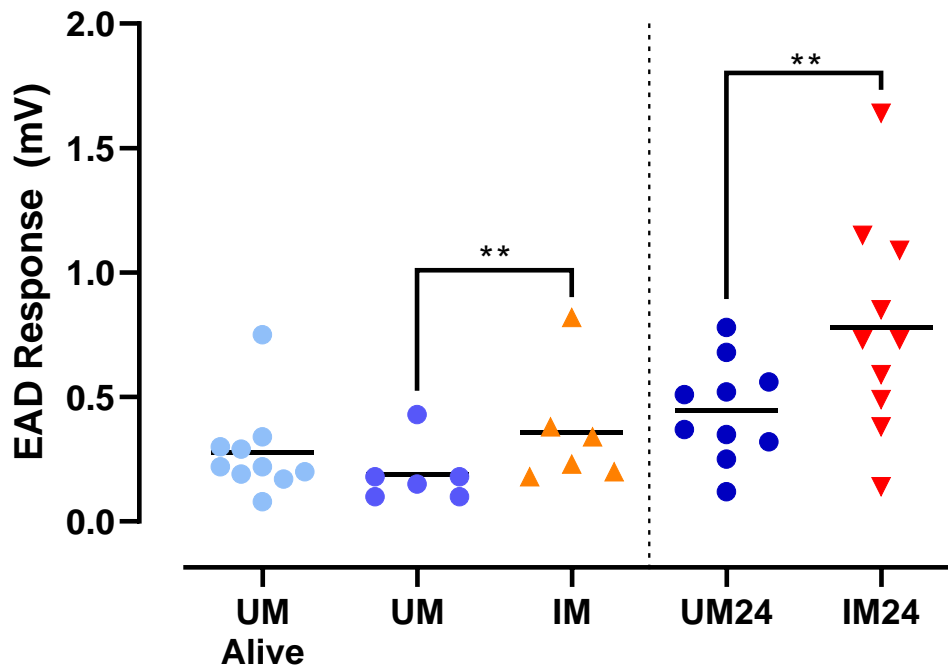

**Supplementary figure 6. Male EAD response to volatiles from male cadavers.** EAD responses (mV) to stimulus pipettes containing either uninfected, living males (UM Alive), uninfected male cadavers (UM), infected male cadavers (IM), Uninfected late-stage male cadavers (UM24), Infected late-stage male cadavers (IM24). There was a significant effect of treatment on the EAD response when comparing IM to UM (linear mixed-effects model (LMM),  $p < 0.01$ ,  $t = 3.835$ ) and when comparing IM24 to UM24 (LMM,  $p < 0.01$ ,  $t = 3.887$ ). (Significance reported as \*  $p < 0.05$ ; \*\*  $p < 0.01$ ; \*\*\*  $p < 0.001$ ).

## Supplementary Figure 7

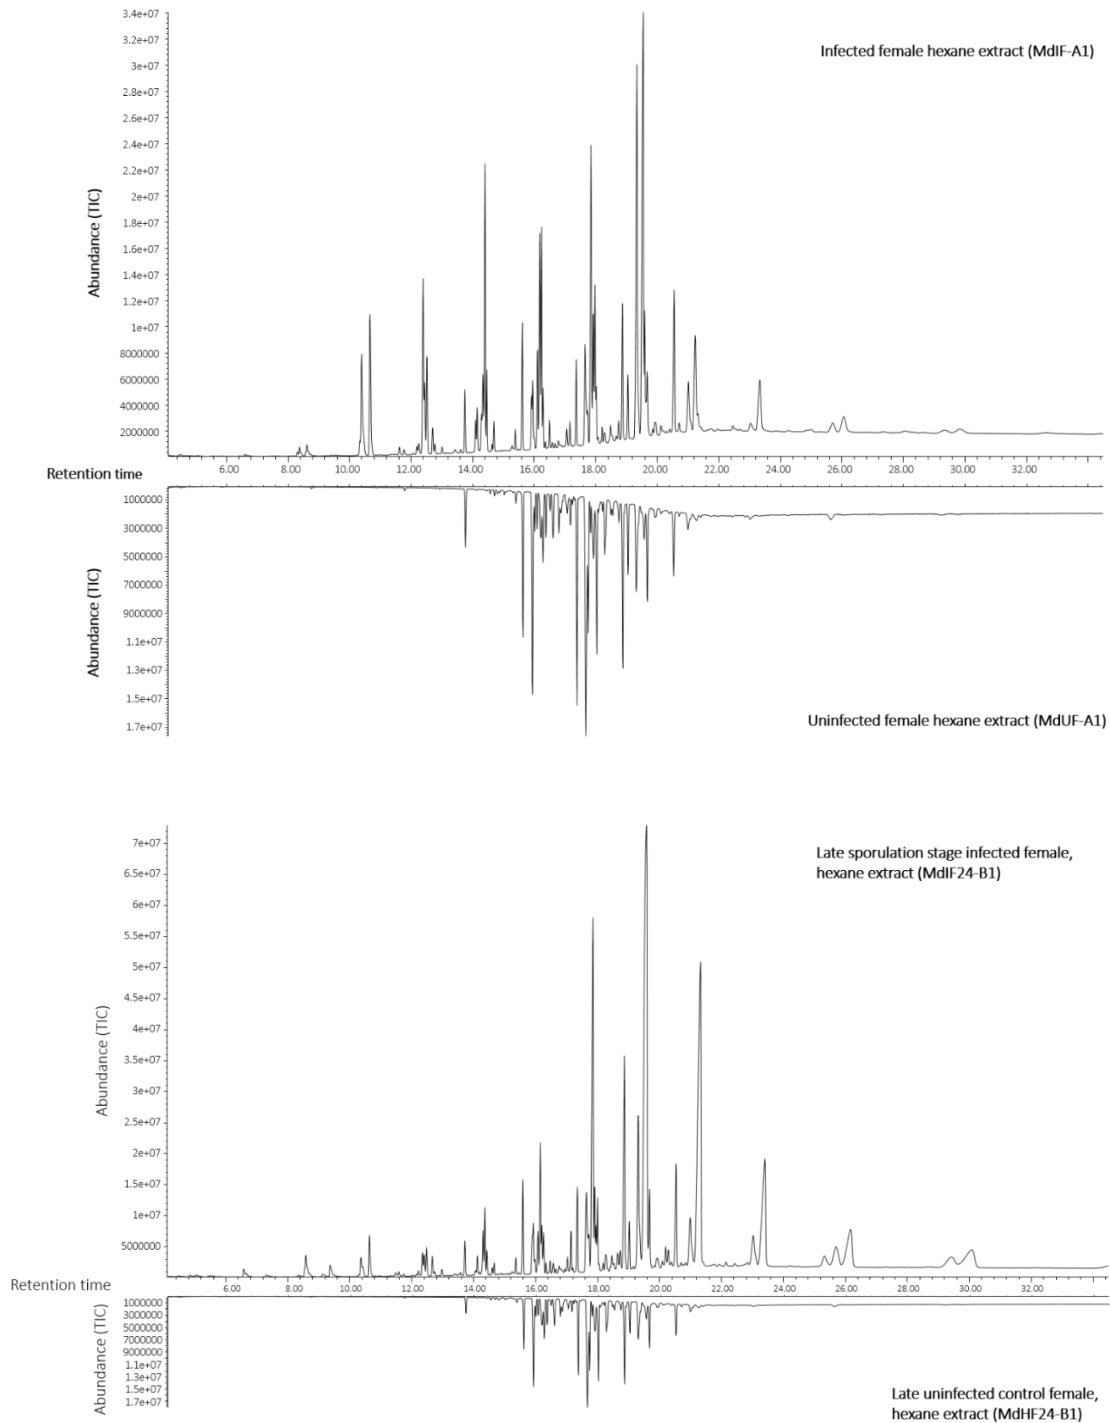

**Supplementary figure 7. Gas chromatography mass spectrometry (GC-MS) representative Total Ion Chromatograms (TIC) of early and late sporulation stage infected female cadavers.** GC-MS analysis conducted on cuticular hexane extracts of *E. muscae* early sporulation stage infected and uninfected female cadavers (top), and late sporulation stage infected and uninfected female control (bottom). Late killed cadavers had been incubated at high humidity for 26-28 hours, to prevent desiccation during sporulation.



## Supplementary figure 8

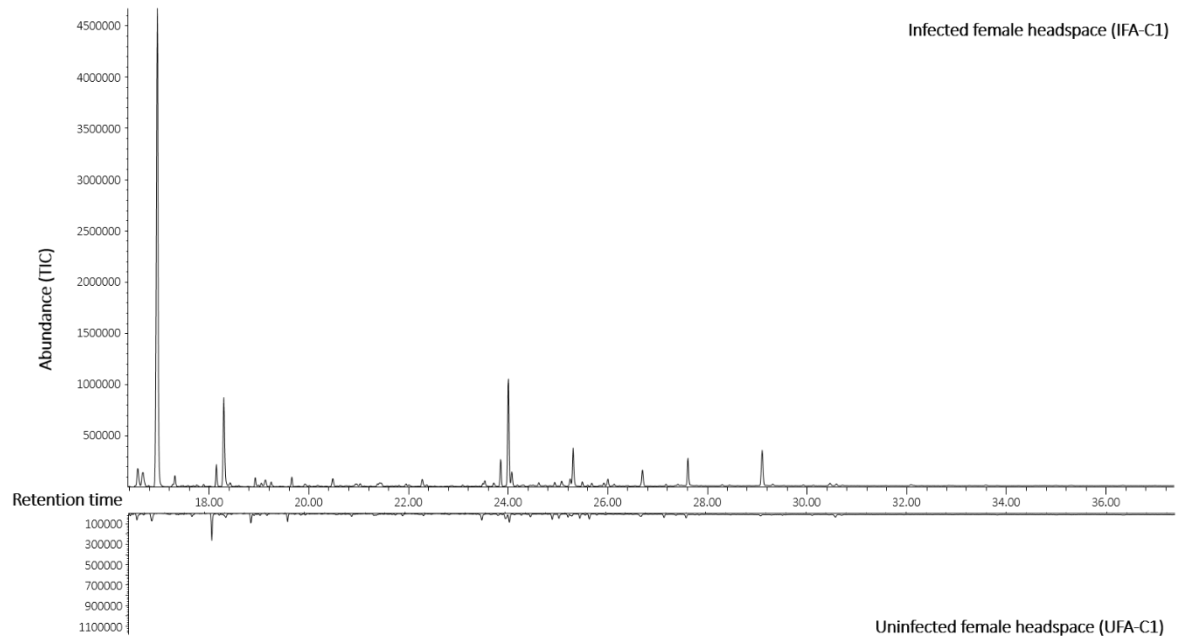

**Supplementary figure 8. Gas chromatography mass spectrometry (GC-MS) representative Total Ion Chromatograms (TIC) of headspace samples from *E. muscae* sporulating females (top) and uninfected females (bottom).** Chromatogram of headspace sampled as an aeration from female, sporulating houseflies (top). Headspace from uninfected female houseflies can be seen in the bottom.

### Supplementary figure 9

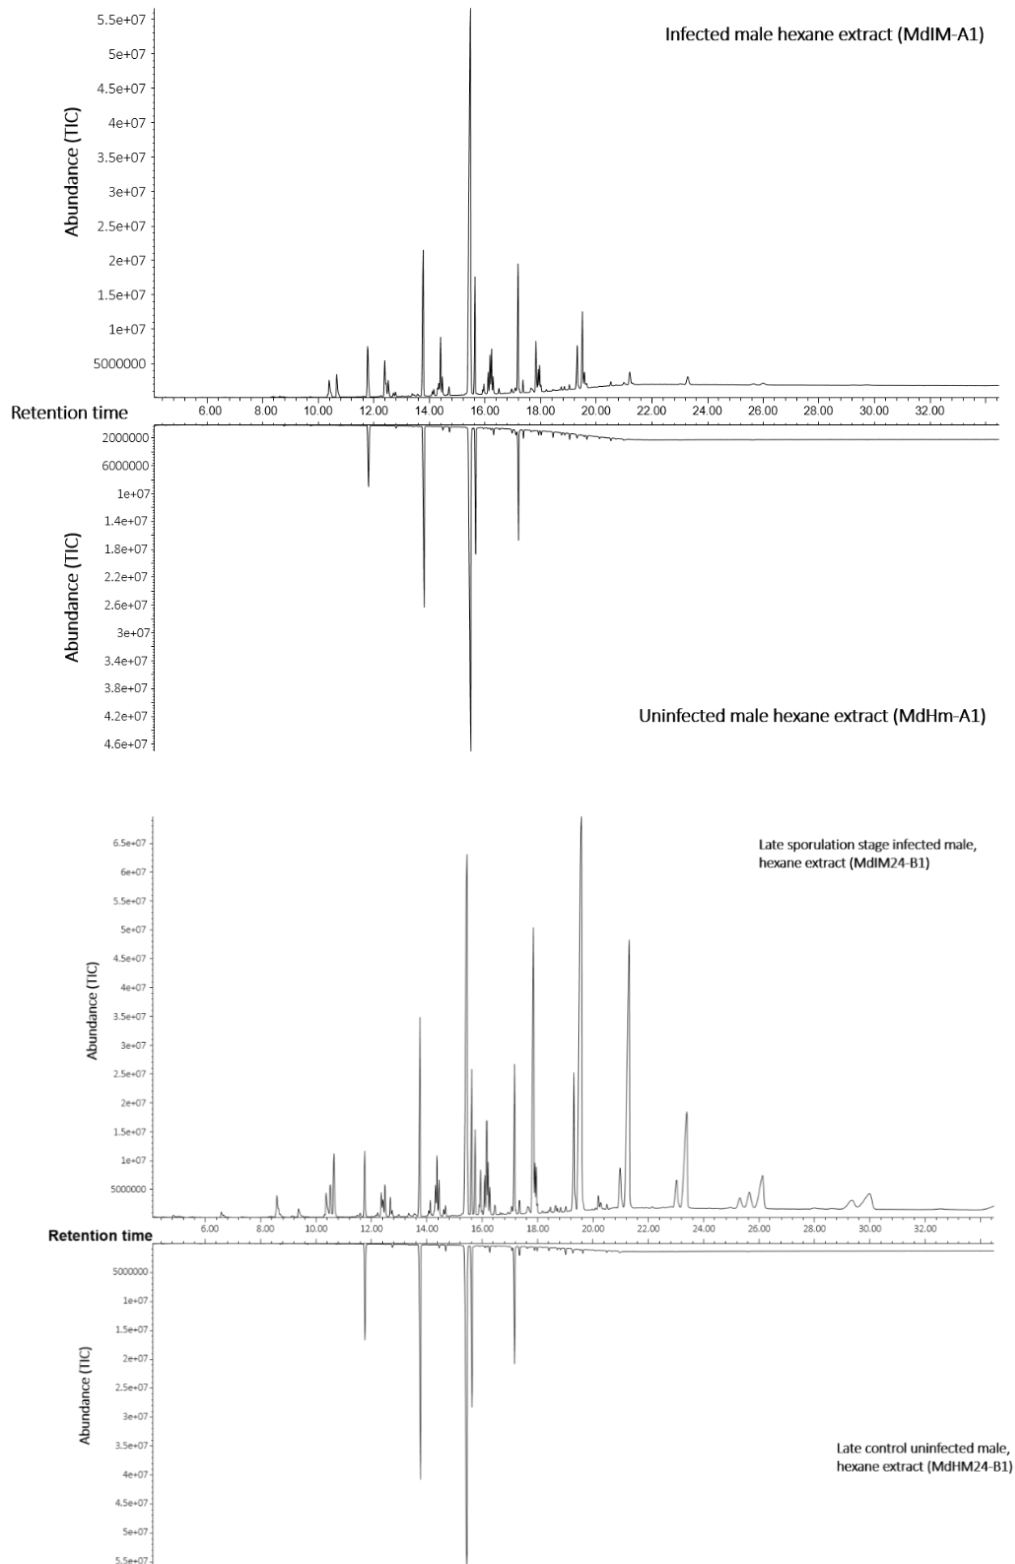

**Supplementary figure 9. Representative Total Ion Chromatograms (TIC) of cuticular extracts of early (top) and late (bottom) sporulation stage infected male cadaver and an uninfected male control. Late killed cadavers had been incubated at high humidity for 24-26 hours, to prevent desiccation during sporulation.**

## Supplementary figure 10

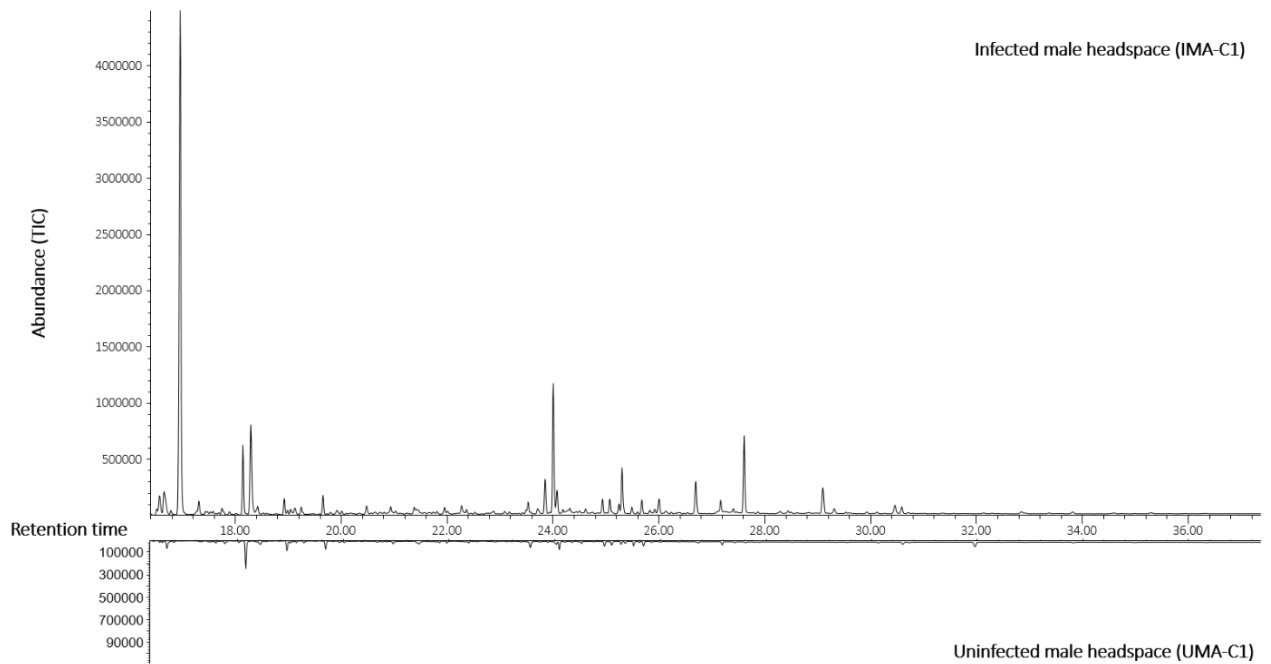

Supplementary figure 10. Total Ion Chromatogram (TOC) of headspace from male, sporulating houseflies (top) and from uninfected male houseflies (bottom).

## Supplementary figure 11

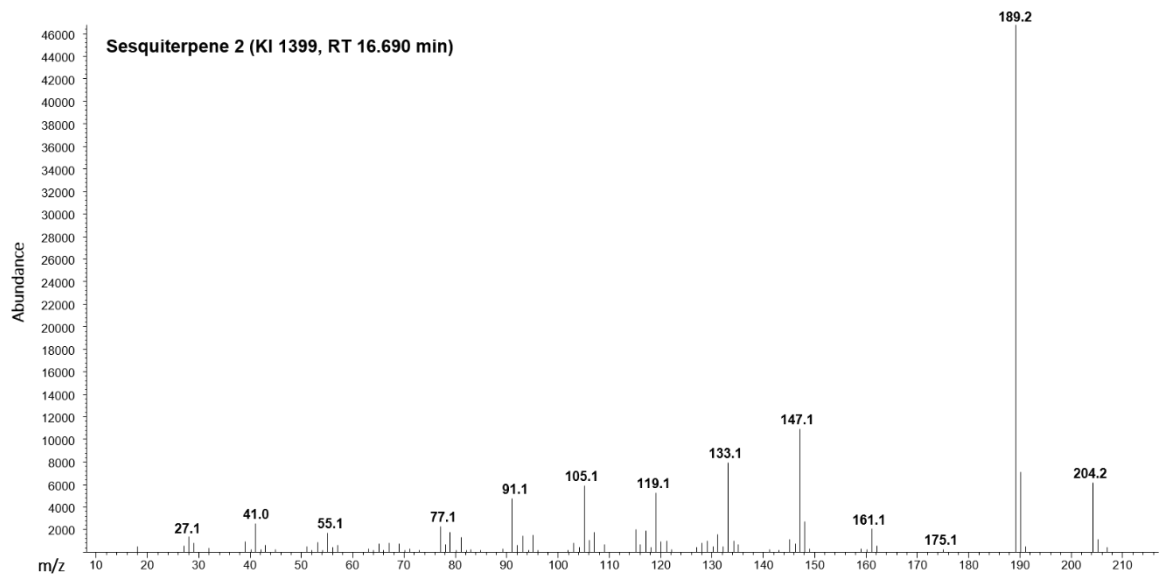

Supplementary figure 11. Mass spectrum of “Sesquiterpene 2”, one of the two unidentified GC-EAD active sesquiterpene compounds.

### Supplementary figure 12

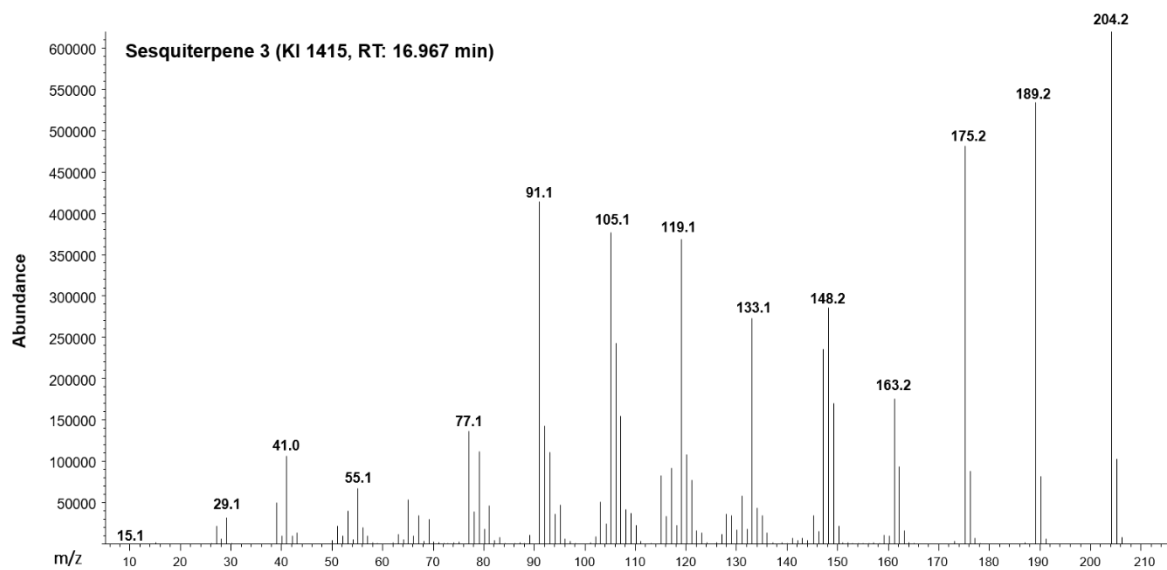

**Supplementary figure 12.** Mass spectrum of “Sesquiterpene 3”, the largest occurring compound in headspace from any *E. muscae* sample.

### Supplementary figure 13

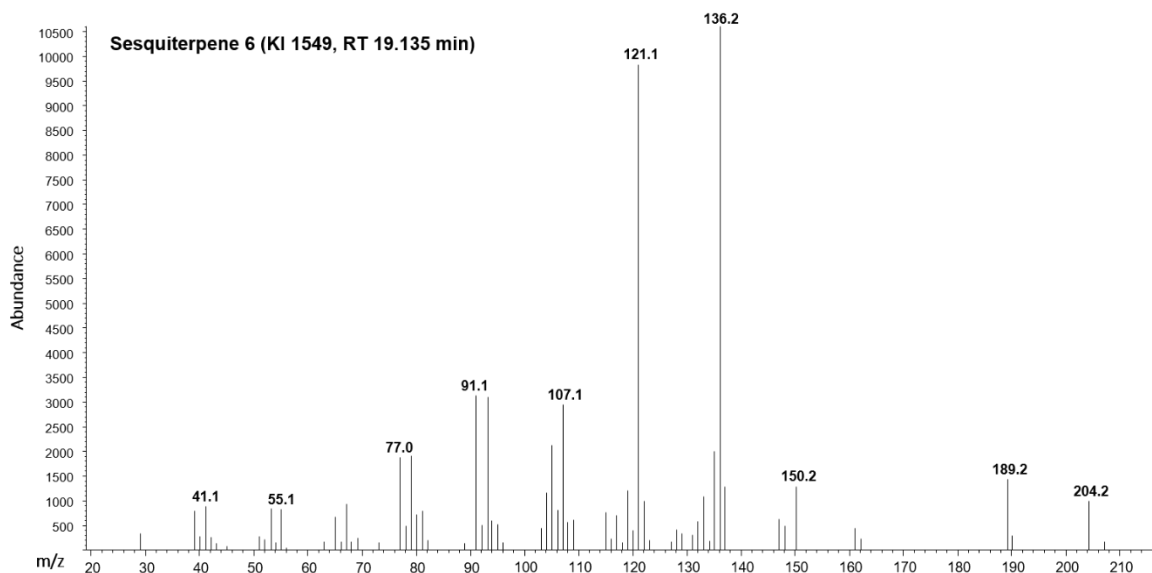

**Supplementary figure 13.** Mass spectrum of “Sesquiterpene 6”, the second GC-EAD active sesquiterpene.

### Supplementary figure 14

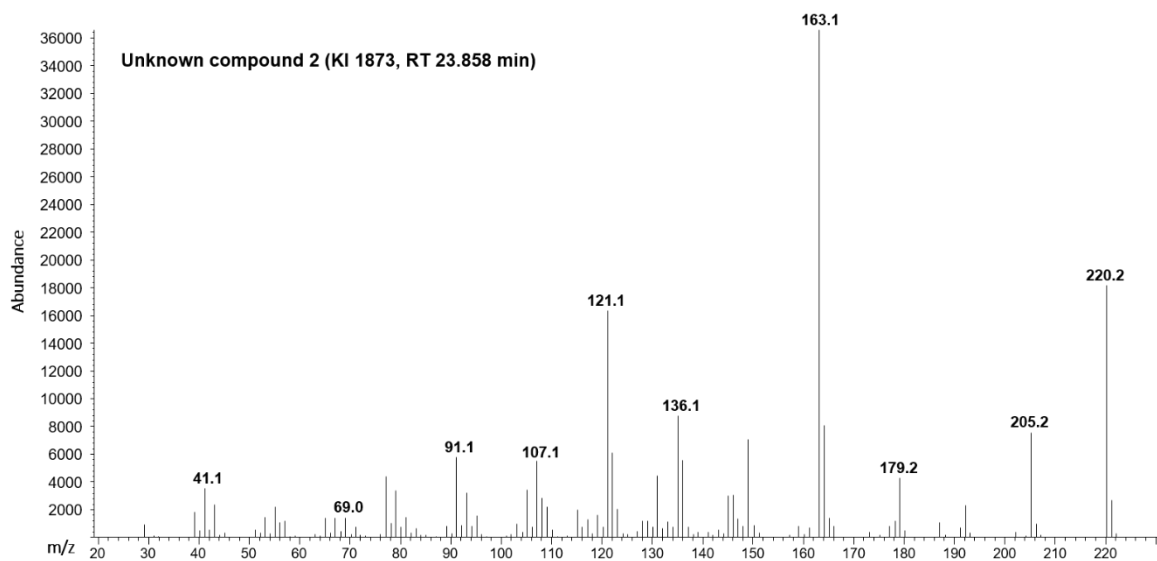

Supplementary figure 14. Mass spectrum of "Unknown compound 2", one of two GC-EAD compounds with unknown structure and identity.

### Supplementary figure 15

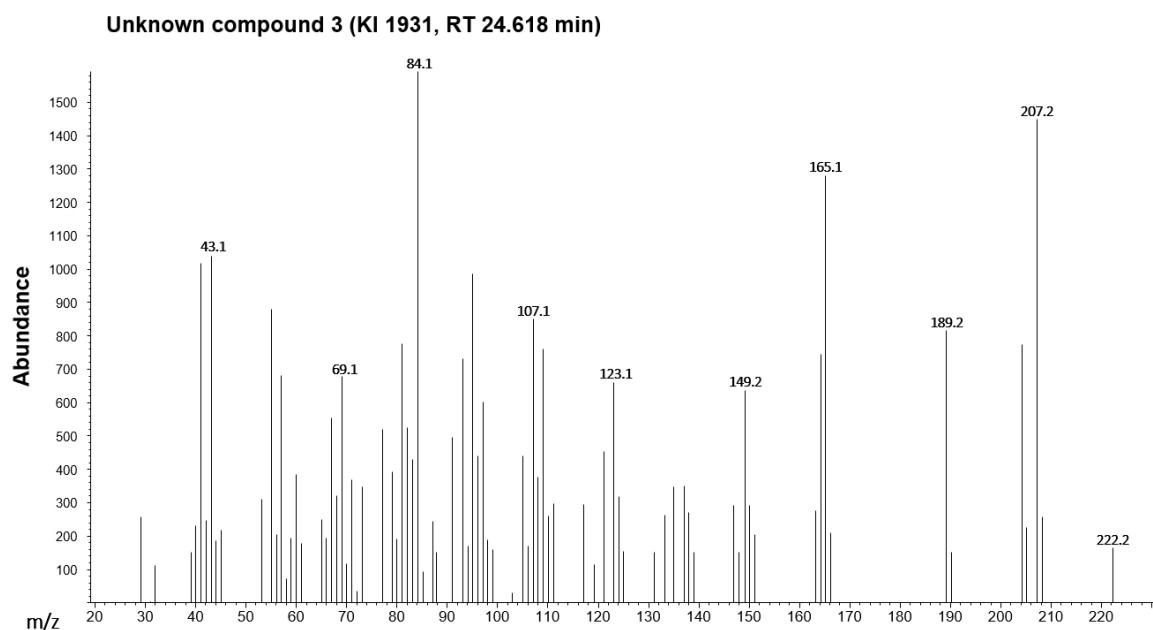

Supplementary figure 15. Mass spectrum of "Unknown compound 3", the second of two GC-EAD compounds with unknown structure and identity.

### Supplementary figure 16

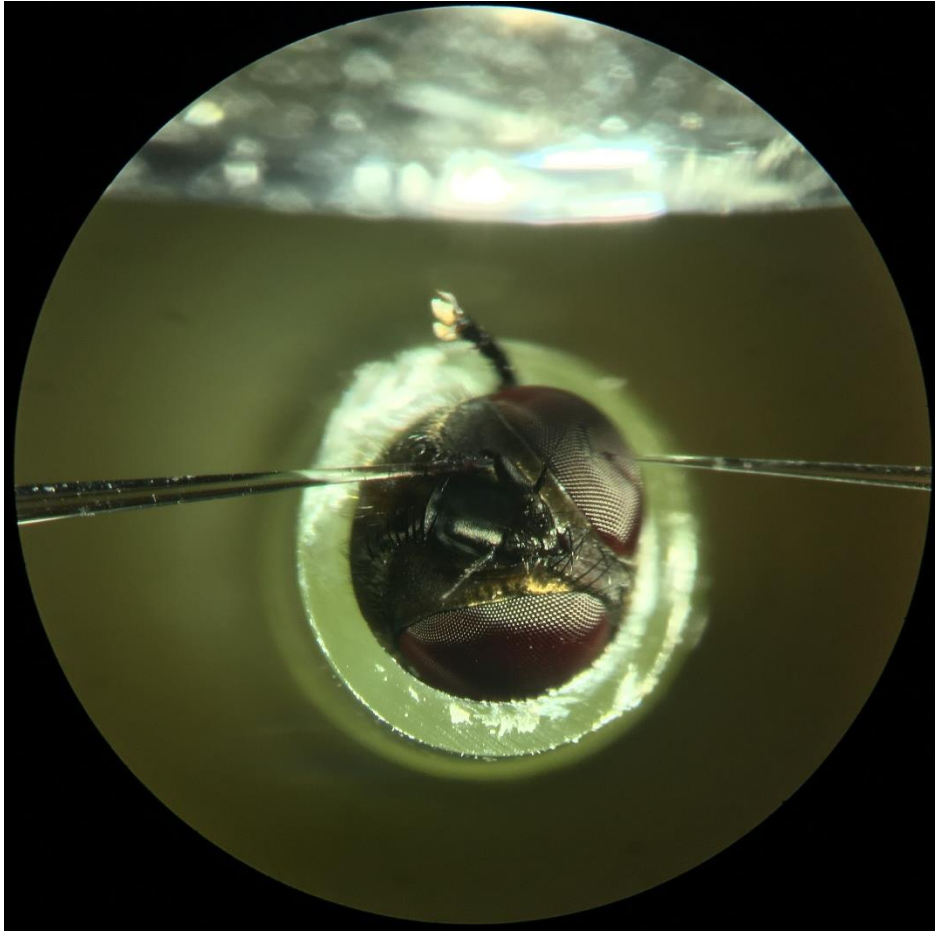

**Supplementary figure 16. GC-EAD setup.** A living, male housefly were fixated in a cut-off pipette tip so that only the head protruded. Electrodes in glass capillaries filled with Ringer solution were placed in eye (ground electrode) and on the tip of the funiculus (recording electrode) on the fly. The top, white glass surface is the glass tube that delivered purified and humidified air stream with compounds eluting from the the GC column.



### Supplementary figure 17

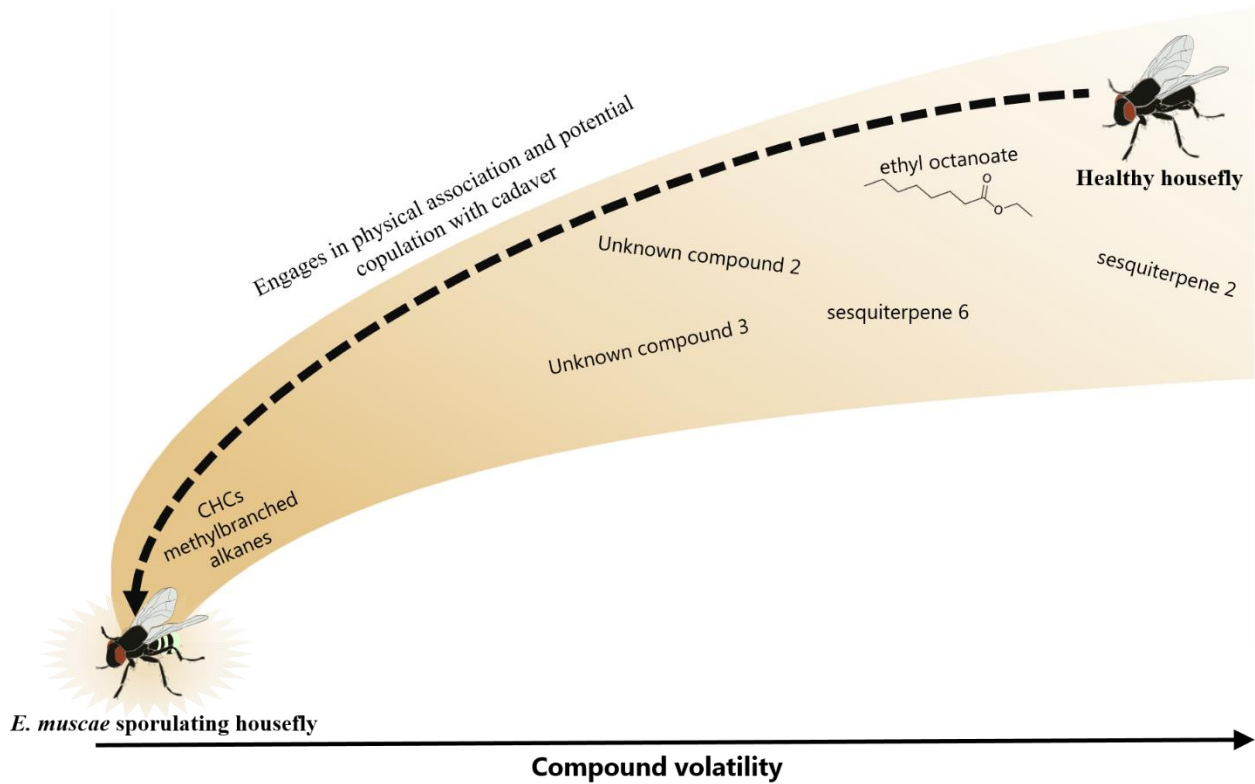

**Supplementary figure 17. Conceptual model of housefly attraction to *E. muscae* sporulating cadavers.** A healthy housefly male encounters a plume of highly volatile attractants. The male follows this increasing gradient of chemical cues until in vicinity of a sporulating female cadaver (dashed arrow). Here, the changes in the CHC profile and the methylbranched alkanes in particular, stimulate male mating behavior and cause him to engage in copulation with the cadaver.

### Supplementary data 1

| Treatment                                                                        | Percentage of males showing successful <i>E. muscae</i> infection |
|----------------------------------------------------------------------------------|-------------------------------------------------------------------|
| <b>M-IF</b> (Male to infected female, early sporulation stage)                   | 15.4 % (n= 13)                                                    |
| <b>M-IF24</b> (Male to infected female, late sporulation stage)                  | 73.33 % (n=15)                                                    |
| <b>M-IF24S</b> (Male to infected female, late sporulation stage with spore halo) | 68.42 % (n= 14)                                                   |
| <b>M-IM</b> (Male to infected male, early sporulation stage)                     | 9,09 % (n=11)                                                     |
| <b>M-IM24</b> (Male to infected male, late sporulation stage)                    | 18,18 % (n=11)                                                    |
| <b>M-IM24S</b> (Male to infected male, late sporulation stage with spore halo)   | 82,35 % (n=17)                                                    |

**Supplementary data 1. Percentage of male flies dying of *E. muscae* infection after exposure to sporulating cadavers.** Males used in mating activity experiment were subsequently anaesthetized with CO<sub>2</sub> and kept in individual cages with food and water ad libitum. All males were monitored for 10 days and assessed for successful *E. muscae* infection (shown by death and visible *E. muscae* conidiophores growing from the cadaver). No males exposed to freeze-killed cadavers (controls) developed *E. muscae* infections.

## Supplementary data 2

| Tentatively identified compound                                                                                               | KI (DB-1 column) | Uninfected females (5)            | Uninfected females, late control (5) | Infected females (5)                | Infected females, late sporulation (5) | Uninfected males (5)                | Uninfected males, late control (5)  | Infected males (5)                    | Infected males, late sporulation (5)  | Conidia from females (2) | Conidia from males (5)          |
|-------------------------------------------------------------------------------------------------------------------------------|------------------|-----------------------------------|--------------------------------------|-------------------------------------|----------------------------------------|-------------------------------------|-------------------------------------|---------------------------------------|---------------------------------------|--------------------------|---------------------------------|
| 1-Undecyl acetate                                                                                                             | 1484.9           | -                                 | -                                    | -                                   | 2.49E+07 ± 2.9E+06                     | -                                   | -                                   | -                                     | 4.65E+07 ± 1.4E+07                    | 1.19E+07                 | 2.69E+07 ± 3.1E+06              |
| 1-Tetradecanol                                                                                                                | 1651.8           | -                                 | -                                    | -                                   | 8.74E+06 ± 3.3E+06                     | -                                   | -                                   | -                                     | 1.58E+07 ± 5.5E+06                    | 2.93E+07                 | 2.94E+07 ± 3.5E+06              |
| 1-Octadecanol                                                                                                                 | 2060.1           | -                                 | -                                    | -                                   | 5.75E+07 ± 1.1E+07                     | -                                   | -                                   | -                                     | 9.43E+07 ± 2.4E+07                    | 9.97E+07                 | 2.36E+08 ± 3.3E+07              |
| Heneicosane                                                                                                                   | 2094.3           | -                                 | -                                    | -                                   | -                                      | 2.90E+06 ± 4.3E+05                  | 2.87E+06 ± 6.8E+04                  | 5.58E+06 ± 9.0E+05                    | 3.90E+07 ± 2.9E+07                    | -                        | -                               |
| Tetradecyl hexanoate                                                                                                          | 2160.7           | -                                 | -                                    | 1.88E+08 ± 4.3E+07                  | 1.78E+08 ± 4.8E+07                     | -                                   | -                                   | 1.01E+08 ± 2.2E+07                    | 2.09E+08 ± 5.2E+07                    | -                        | -                               |
| Octadecyl isocyanate                                                                                                          | 2171.6           | -                                 | -                                    | -                                   | -                                      | -                                   | -                                   | -                                     | -                                     | 3.38E+08                 | 1.96E+08 ± 3.7E+07              |
| 1-Octadecyl acetate                                                                                                           | 2184.0           | -                                 | -                                    | 1.92E+08 ± 4.2E+07                  | 2.34E+08 ± 4.7E+07                     | -                                   | -                                   | 1.16E+08 ± 1.0E+07                    | 4.37E+08 ± 4.5E+07                    | 4.66E+07                 | 1.24E+08 ± 7.7E+06              |
| Tricosene                                                                                                                     | 2268.6           | -                                 | -                                    | -                                   | 1.82E+07 ± 2.2E+06                     | -                                   | -                                   | -                                     | 2.93E+07 ± 6.9E+06                    | -                        | -                               |
| Tricosane                                                                                                                     | 2301.1           | 4.91E+06 ± 1.0E+06                | 3.32E+06 ± 2.6E+05                   | 1.21E+07 ± 2.6E+06                  | 1.53E+07 ± 2.4E+06                     | 2.48E+08 ± 2.3E+07                  | 3.65E+08 ± 2.0E+07                  | 2.90E+08 ± 3.1E+07                    | 3.37E+08 ± 2.9E+07                    | -                        | -                               |
| Tetradecyl octanoate                                                                                                          | 2355.0           | -                                 | -                                    | 2.14E+08 ± 4.8E+07                  | 1.39E+08 ± 3.0E+07                     | -                                   | -                                   | 1.51E+08 ± 5.0E+07                    | 2.68E+08 ± 5.0E+07                    | 3.42E+07                 | 3.21E+07 ± 4.1E+06              |
| Hexadecyl hexanoate                                                                                                           | 2359.1           | -                                 | -                                    | 7.63E+07 ± 1.6E+07                  | 1.05E+08 ± 1.4E+07                     | -                                   | -                                   | 5.03E+07 ± 5.2E+06                    | 1.11E+08 ± 1.1E+07                    | 6.57E+06                 | 6.89E+06 ± 1.6E+06              |
| Octadecyl butyrate                                                                                                            | 2365.9           | -                                 | -                                    | 1.10E+08 ± 2.4E+07                  | 1.47E+08 ± 2.8E+07                     | -                                   | -                                   | 7.29E+07 ± 1.1E+07                    | 1.91E+08 ± 2.3E+07                    | 2.66E+07                 | 8.33E+07 ± 6.0E+06              |
| 1-Eicosyl acetate                                                                                                             | 2386.0           | -                                 | -                                    | 2.91E+07 ± 6.9E+06                  | 8.11E+07 ± 7.9E+06                     | -                                   | -                                   | 2.78E+07 ± 8.3E+06                    | 1.18E+08 ± 1.3E+07                    | 3.36E+07                 | 8.91E+07 ± 3.9E+06              |
| Tetracosane                                                                                                                   | 2393.6           | -                                 | -                                    | 1.74E+07 ± 3.3E+06                  | 2.62E+07 ± 6.7E+06                     | 9.19E+06 ± 7.4E+05                  | 1.32E+07 ± 4.7E+05                  | 3.84E+07 ± 1.0E+07                    | 4.14E+07 ± 7.0E+06                    | -                        | -                               |
| Pentacosene                                                                                                                   | 2477.3           | -                                 | -                                    | -                                   | -                                      | -                                   | -                                   | 6.26E+07 ± 1.8E+07                    | 5.34E+07 ± 1.5E+07                    | -                        | -                               |
| Pentacosane                                                                                                                   | 2493.4           | 7.35E+07 ± 9.4E+06                | 5.65E+07 ± 2.4E+06                   | 1.37E+08 ± 2.4E+07                  | 1.61E+08 ± 1.9E+07                     | 7.23E+08 ± 6.2E+07                  | 1.13E+09 ± 3.5E+07                  | 6.81E+08 ± 6.7E+07                    | 9.46E+08 ± 6.6E+07                    | -                        | 8.98E+06 ± 1.3E+06              |
| 9-, 11-, 13-Methylpentacosanes                                                                                                | 2531.8           | 2.77E+06 ± 4.6E+05                | 1.97E+06 ± 1.6E+05                   | -                                   | -                                      | -                                   | -                                   | -                                     | -                                     | -                        | -                               |
| Hexadecyl octanoate                                                                                                           | 2556.2           | -                                 | -                                    | 1.23E+08 ± 3.1E+07                  | 2.14E+08 ± 2.7E+07                     | -                                   | -                                   | 6.38E+07 ± 6.6E+06                    | 2.96E+08 ± 4.5E+07                    | 2.01E+07                 | 3.28E+07 ± 3.5E+06              |
| Octadecyl hexanoate                                                                                                           | 2561.7           | -                                 | -                                    | 2.79E+08 ± 6.0E+07                  | 2.75E+08 ± 4.9E+07                     | -                                   | -                                   | 2.06E+08 ± 2.2E+07                    | 2.94E+08 ± 2.4E+07                    | 7.72E+06                 | 1.53E+07 ± 2.1E+06              |
| 3-Methylpentacosane                                                                                                           | 2569.1           | 2.24E+06 ± 3.4E+05                | 1.58E+06 ± 4.1E+05                   | -                                   | -                                      | -                                   | -                                   | -                                     | -                                     | -                        | -                               |
| 9-Hexacosene <sup>A</sup> + unknown compound <sup>B</sup>                                                                     | 2570.8           | -                                 | -                                    | -                                   | -                                      | 1.11E+07 ± 1.5E+06 <sup>A</sup>     | 1.47E+07 ± 1.0E+06 <sup>A</sup>     | 8.59E+07 ± 1.4E+07 <sup>A,B</sup>     | 1.93E+08 ± 1.9E+07 <sup>A,B</sup>     | -                        | -                               |
| 5,9-Dimethylpentacosane                                                                                                       | 2580.1           | 6.58E+06 ± 1.2E+06                | 1.01E+07 ± 3.7E+06                   | -                                   | -                                      | -                                   | -                                   | -                                     | -                                     | -                        | -                               |
| 1-Docosyl acetate                                                                                                             | 2586.5           | -                                 | -                                    | 7.40E+06 ± 2.4E+06                  | 5.06E+07 ± 1.5E+07                     | -                                   | -                                   | 8.38E+06 ± 3.6E+06                    | 4.01E+07 ± 6.1E+06                    | 8.74E+06                 | 2.71E+07 ± 1.7E+06              |
| Hexacosane                                                                                                                    | 2594.9           | 8.48E+06 ± 1.1E+06                | 1.37E+07 ± 6.4E+06                   | 4.42E+07 ± 6.4E+06                  | 7.02E+07 ± 1.6E+07                     | 1.79E+07 ± 1.4E+06                  | 2.50E+07 ± 1.3E+06                  | 4.76E+07 ± 9.2E+06                    | 6.38E+07 ± 1.1E+07                    | -                        | -                               |
| 3,7-, 3,9-, 3,11- and 3,13-Dimethylpentacosanes                                                                               | 2606.7           | 1.12E+07 ± 2.0E+06                | 9.95E+06 ± 1.8E+06                   | -                                   | -                                      | -                                   | -                                   | -                                     | -                                     | -                        | -                               |
| 10-, 12-, 13-Methylhexacosanes                                                                                                | 2631.8           | 7.30E+06 ± 1.2E+06                | 6.45E+06 ± 5.8E+05                   | -                                   | -                                      | -                                   | -                                   | -                                     | -                                     | -                        | -                               |
| 2-Methylhexacosane                                                                                                            | 2659.6           | 5.40E+06 ± 1.0E+06                | 2.66E+06 ± 6.6E+05                   | 1.21E+07 ± 2.3E+06                  | -                                      | -                                   | -                                   | -                                     | -                                     | -                        | -                               |
| Heptacosene                                                                                                                   | 2672.8           | 2.31E+07 ± 3.6E+06                | 3.21E+07 ± 1.2E+07                   | 4.81E+07 ± 8.3E+06                  | 9.39E+07 ± 1.9E+07                     | 1.84E+09 ± 1.9E+08                  | 2.67E+09 ± 1.5E+08                  | 2.95E+09 ± 2.3E+08                    | 3.69E+09 ± 3.0E+08                    | -                        | 3.86E+07 ± 7.0E+06              |
| Heptacosane                                                                                                                   | 2696.9           | 2.16E+08 ± 2.4E+07                | 1.75E+08 ± 1.6E+07                   | 2.75E+08 ± 4.6E+07                  | 3.20E+08 ± 1.5E+07                     | 4.82E+08 ± 5.1E+07                  | 7.69E+08 ± 4.2E+07                  | 4.56E+08 ± 4.2E+07                    | 6.47E+08 ± 4.9E+07                    | -                        | -                               |
| 9-, 11-, 13-Methylheptacosanes                                                                                                | 2729.4           | 3.73E+08 ± 3.7E+07                | 3.70E+08 ± 2.4E+07                   | 1.60E+08 ± 4.3E+07                  | 1.45E+08 ± 3.6E+07                     | 4.81E+06 ± 6.5E+05                  | 6.01E+06 ± 7.7E+05                  | 1.76E+07 ± 3.9E+06                    | -                                     | -                        | -                               |
| 7-Methylheptacosane                                                                                                           | 2740.0           | 5.30E+07 ± 6.4E+06                | 8.05E+07 ± 2.9E+07                   | 4.93E+07 ± 1.9E+07                  | 4.59E+07 ± 3.6E+06                     | 2.11E+06 ± 4.8E+05                  | 2.43E+06 ± 4.1E+05                  | 3.85E+06 ± 1.5E+06                    | -                                     | -                        | -                               |
| 5-Methylheptacosane <sup>A</sup> + Tetradecyl dodecanoate <sup>B</sup>                                                        | 2747.5           | 4.75E+07 ± 5.8E+06 <sup>A</sup>   | 5.84E+07 ± 1.1E+07 <sup>A</sup>      | 1.21E+08 ± 2.3E+07 <sup>A,B</sup>   | 1.86E+08 ± 1.5E+07 <sup>A,B</sup>      | -                                   | -                                   | 7.97E+07 ± 8.1E+06 <sup>A,B</sup>     | 2.57E+08 ± 3.9E+07 <sup>A,B</sup>     | 7.55E+07 <sup>B</sup>    | 4.80E+07 ± 6.6E+06 <sup>B</sup> |
| Octadecyl octanoate                                                                                                           | 2757.3           | -                                 | -                                    | 2.39E+08 ± 4.7E+07                  | 4.91E+08 ± 6.0E+07                     | -                                   | -                                   | 1.42E+08 ± 1.4E+07                    | 6.21E+08 ± 6.8E+07                    | 4.75E+07                 | 1.02E+08 ± 1.4E+07              |
| 9,13-, 11,15-Dimethylheptacosanes                                                                                             | 2761.0           | 1.42E+08 ± 1.6E+07                | 1.49E+08 ± 2.1E+07                   | -                                   | -                                      | -                                   | -                                   | -                                     | -                                     | -                        | -                               |
| 2-Methylheptacosane                                                                                                           | 2761.1           | -                                 | -                                    | -                                   | -                                      | 6.80E+06 ± 7.7E+05                  | 8.91E+06 ± 1.0E+06                  | -                                     | -                                     | -                        | -                               |
| 3-Methylheptacosane <sup>A</sup> + 7,11-Dimethylheptacosane <sup>B</sup> + C28:1 <sup>C</sup> + unknown compound <sup>D</sup> | 2771.0           | 1.52E+08 ± 1.7E+07 <sup>A,B</sup> | 1.53E+08 ± 1.7E+07 <sup>A,B</sup>    | 8.20E+07 ± 1.4E+07 <sup>A,B,D</sup> | 1.50E+08 ± 1.1E+07 <sup>A,B,D</sup>    | 2.31E+07 ± 3.1E+06 <sup>A,B,D</sup> | 3.18E+07 ± 2.7E+06 <sup>A,B,C</sup> | 8.20E+07 ± 1.1E+07 <sup>A,B,C,D</sup> | 1.41E+08 ± 1.4E+07 <sup>A,B,C,D</sup> | -                        | -                               |
| 5,9-Dimethylheptacosane                                                                                                       | 2779.5           | 7.30E+07 ± 8.1E+06                | 7.79E+07 ± 1.4E+07                   | 1.88E+07 ± 4.8E+06                  | 4.85E+07 ± 1.5E+07                     | -                                   | -                                   | -                                     | -                                     | -                        | -                               |
| Octacosane                                                                                                                    | 2794.7           | 2.94E+07 ± 4.0E+06                | 4.14E+07 ± 1.4E+07                   | 4.01E+07 ± 6.1E+06                  | 8.18E+07 ± 2.2E+07                     | 3.91E+06 ± 4.6E+05                  | 5.83E+06 ± 4.8E+05                  | 2.36E+07 ± 3.7E+06                    | 5.02E+07 ± 1.7E+07                    | -                        | -                               |
| 3,7-, 3,9-, 3,11-Dimethylheptacosanes                                                                                         | 2805.9           | 1.09E+08 ± 1.2E+07                | 1.21E+08 ± 2.0E+07                   | 2.26E+07 ± 6.2E+06                  | 6.36E+07 ± 1.8E+07                     | -                                   | -                                   | -                                     | -                                     | -                        | -                               |

|                                                                                                                                  |        |                                       |                                       |                                         |                                        |                                       |                                       |                                         |                                        |                           |                                        |
|----------------------------------------------------------------------------------------------------------------------------------|--------|---------------------------------------|---------------------------------------|-----------------------------------------|----------------------------------------|---------------------------------------|---------------------------------------|-----------------------------------------|----------------------------------------|---------------------------|----------------------------------------|
| Squalene                                                                                                                         | 2814.9 | -                                     | -                                     | 5.35E+06<br>± 1.1E+06                   | 3.40E+07 ±<br>1.2E+07                  | -                                     | -                                     | 4.51E+06<br>± 1.2E+06                   | 1.76E+07 ±<br>3.6E+06                  | 7.16E+06                  | 8.79E+06 ±<br>1.2E+06                  |
| 12-, 13-, 14-<br>Methyloctacosanes                                                                                               | 2827.5 | 6.98E+07<br>± 6.6E+06                 | 7.05E+07<br>± 1.2E+07                 | 2.36E+07<br>± 4.9E+06                   | 5.55E+07 ±<br>2.0E+07                  | -                                     | -                                     | -                                       | -                                      | -                         | -                                      |
| 4-, 6-, 8-, 10-<br>Methyloctacosanes                                                                                             | 2835.9 | 6.14E+07<br>± 7.2E+06                 | 7.71E+07<br>± 1.8E+07                 | 1.23E+07<br>± 2.4E+06                   | 4.09E+07 ±<br>1.7E+07                  | -                                     | -                                     | -                                       | -                                      | -                         | -                                      |
| 2-Methyloctacosane                                                                                                               | 2859.5 | 5.36E+07<br>± 6.3E+06                 | 5.60E+07<br>± 1.9E+07                 | 4.32E+07<br>± 6.8E+06                   | 8.22E+07 ±<br>1.6E+07                  | -                                     | -                                     | -                                       | -                                      | -                         | -                                      |
| Nonacosene                                                                                                                       | 2872.6 | 4.87E+07<br>± 6.3E+06                 | 4.92E+07<br>± 8.9E+06                 | 7.91E+07<br>± 1.9E+07                   | 1.30E+08 ±<br>1.6E+07                  | 3.56E+08<br>± 4.2E+07                 | 5.60E+08<br>± 4.7E+07                 | 5.54E+08<br>± 3.5E+07                   | 7.88E+08 ±<br>7.9E+07                  | -                         | -                                      |
| Nonacosane                                                                                                                       | 2894.6 | 3.07E+08<br>± 4.1E+07                 | 2.59E+08<br>± 1.4E+07                 | 2.01E+08<br>± 4.2E+07                   | 2.80E+08 ±<br>4.1E+07                  | 2.79E+07<br>± 2.6E+06                 | 4.05E+07<br>± 2.8E+06                 | 4.84E+07<br>± 3.5E+06                   | 7.90E+07 ±<br>1.0E+07                  | -                         | -                                      |
| 9-, 11-, 13-, 15-<br>Methylnonacosane                                                                                            | 2929.4 | 6.43E+08<br>± 5.9E+07                 | 5.74E+08<br>± 3.5E+07                 | 3.87E+08<br>± 7.5E+07                   | 4.87E+08 ±<br>5.9E+07                  | -                                     | -                                     | -                                       | -                                      | -                         | -                                      |
| 7-Methylnonacosane                                                                                                               | 2936.1 | 1.84E+08<br>± 1.9E+07                 | 1.81E+08<br>± 1.3E+07                 | 1.04E+08<br>± 2.6E+07                   | 1.28E+08 ±<br>2.0E+07                  | 2.44E+06<br>± 3.2E+05                 | 2.93E+06<br>± 1.4E+05                 | 1.81E+07<br>± 1.8E+06                   | -                                      | -                         | -                                      |
| 5-Methylnonacosane                                                                                                               | 2948.3 | 4.96E+07<br>± 6.2E+06                 | 4.91E+07<br>± 5.9E+06                 | -                                       | -                                      | -                                     | -                                     | -                                       | -                                      | -                         | -                                      |
| Myristyl myristate                                                                                                               | 2951.8 | -                                     | -                                     | 4.03E+08<br>± 8.4E+07                   | 1.29E+09 ±<br>1.8E+08                  | -                                     | -                                     | 2.20E+08<br>± 2.4E+07                   | 1.99E+09 ±<br>3.2E+08                  | 2.46E+09                  | 1.78E+09 ±<br>2.5E+08                  |
| 2-Methylnonacosane <sup>A</sup><br>+ unknown compound <sup>B</sup>                                                               | 2959.8 | 1.91E+08<br>±<br>2.1E+07 <sup>A</sup> | 1.79E+08<br>±<br>1.7E+07 <sup>A</sup> | 1.95E+08<br>±<br>2.9E+07 <sup>A,B</sup> | 2.97E+08 ±<br>3.1E+07 <sup>A,B</sup>   | -                                     | -                                     | -                                       | -                                      | -                         | -                                      |
| 3-Methylnonacosane                                                                                                               | 2971.8 | 2.88E+08<br>± 3.3E+07                 | 2.78E+08<br>± 2.1E+07                 | 1.44E+08<br>± 3.4E+07                   | 1.99E+08 ±<br>3.1E+07                  | 1.55E+07<br>± 1.6E+06                 | 1.99E+07<br>± 2.4E+06                 | 8.37E+07<br>± 1.8E+07                   | 1.35E+08 ±<br>5.2E+07                  | -                         | -                                      |
| Triacotane                                                                                                                       | 2994.8 | 2.46E+07<br>± 3.7E+06                 | 2.56E+07<br>± 6.0E+06                 | 2.93E+07<br>± 4.8E+06                   | 5.63E+07 ±<br>1.1E+07                  | -                                     | -                                     | 8.22E+06<br>± 7.1E+05                   | 2.28E+07 ±<br>4.1E+06                  | -                         | -                                      |
| 3,7-, 3,9-, 3,11-,<br>3,13-<br>Dimethylnonacosanes                                                                               | 3003.2 | 1.53E+08<br>± 1.6E+07                 | 1.50E+08<br>± 1.8E+07                 | 3.87E+08<br>± 1.4E+07                   | 4.87E+08 ±<br>2.0E+07                  | -                                     | -                                     | -                                       | -                                      | -                         | -                                      |
| 10-, 12-<br>Methyltriacontanes                                                                                                   | 3027.8 | 3.13E+07<br>± 4.6E+06                 | 3.00E+07<br>± 7.7E+06                 | 4.74E+07<br>± 1.1E+07                   | 6.25E+07 ±<br>4.4E+06                  | -                                     | -                                     | -                                       | -                                      | -                         | -                                      |
| 8-Methyltriacontane                                                                                                              | 3034.2 | 3.97E+07<br>± 4.7E+06                 | 4.41E+07<br>± 9.3E+06                 | 2.99E+07<br>± 7.1E+06                   | 2.38E+07 ±<br>4.9E+06                  | -                                     | -                                     | -                                       | -                                      | -                         | -                                      |
| 2-, 4-methyltriacontanes                                                                                                         | 3059.5 | 4.92E+07<br>± 6.3E+06                 | 5.20E+07<br>± 1.2E+07                 | 5.76E+07<br>± 9.2E+06                   | 7.62E+07 ±<br>7.9E+06                  | 1.05E+07<br>± 1.4E+06                 | 1.31E+07<br>± 1.9E+06                 | 1.56E+07<br>± 1.4E+06                   | 3.12E+07 ±<br>4.5E+06                  | -                         | -                                      |
| Hentriacontene                                                                                                                   | 3074.1 | 2.72E+08<br>± 3.3E+07                 | 2.69E+08<br>± 2.4E+07                 | 4.91E+08<br>± 1.0E+08                   | 6.20E+08 ±<br>9.4E+07                  | 8.01E+06<br>± 9.8E+05                 | 1.03E+07<br>± 1.0E+06                 | 1.85E+07<br>± 2.4E+06                   | 4.09E+07 ±<br>7.7E+06                  | -                         | -                                      |
| Hentriacontane                                                                                                                   | 3096.4 | 1.19E+08<br>± 1.8E+07                 | 1.03E+08<br>± 6.6E+06                 | 1.67E+08<br>± 4.0E+07                   | 2.08E+08 ±<br>1.2E+07                  | 1.87E+07<br>± 1.7E+06                 | 2.46E+07<br>± 1.1E+06                 | 2.13E+07<br>± 2.1E+06                   | 5.52E+07 ±<br>9.8E+06                  | -                         | -                                      |
| 9-, 11-, 13-, 15-<br>Methylhentriacontanes <sup>A</sup><br>+ unknown compound <sup>B</sup>                                       | 3129.9 | 2.37E+08<br>±<br>2.9E+07 <sup>A</sup> | 3.05E+08<br>±<br>3.5E+07 <sup>A</sup> | 7.93E+08<br>±<br>1.1E+08 <sup>A,B</sup> | 1.12E+09 ±<br>1.4E+08 <sup>A,B</sup>   | 2.05E+07<br>±<br>2.4E+06 <sup>A</sup> | 2.68E+07<br>±<br>2.5E+06 <sup>A</sup> | 2.29E+08<br>±<br>2.0E+07 <sup>A,B</sup> | -                                      | -                         | -                                      |
| 7-Methylhentriacontane                                                                                                           | 3137.7 | 2.91E+07<br>± 3.6E+06                 | 1.08E+07<br>± 4.0E+06                 | 6.46E+07<br>± 1.4E+07                   | -                                      | 2.81E+06<br>± 2.0E+05                 | 3.60E+06<br>± 4.6E+05                 | -                                       | -                                      | -                         | -                                      |
| 5-Methylhentriacontane                                                                                                           | 3149.7 | 1.79E+07<br>± 3.2E+06                 | 6.33E+06<br>± 2.3E+06                 | -                                       | -                                      | 3.67E+06<br>± 3.1E+05                 | 3.63E+06<br>± 3.9E+05                 | -                                       | -                                      | -                         | -                                      |
| 2-<br>Methylhentriacontane <sup>A</sup><br>+ Octadecyl<br>dodecanoate <sup>B</sup><br>+ Hexadecyl<br>tetradecanoate <sup>C</sup> | 3163.6 | 9.36E+07<br>±<br>1.2E+07 <sup>A</sup> | 9.81E+07<br>±<br>1.3E+07 <sup>A</sup> | 8.51E+08<br>±<br>1.8E+08 <sup>A</sup>   | 3.41E+09 ±<br>5.2E+08 <sup>A,B,C</sup> | 8.78E+06<br>±<br>9.2E+05 <sup>A</sup> | 9.71E+06<br>±<br>1.1E+06 <sup>A</sup> | 3.73E+08<br>±<br>4.0E+07 <sup>B,C</sup> | 5.08E+09 ±<br>7.1E+08 <sup>B,C</sup>   | 7.67E+09 <sup>B,C</sup>   | 1.08E+10 ±<br>9.1E+08 <sup>B,C</sup>   |
| 3-Methylhentriacontane                                                                                                           | 3172.3 | 1.85E+08<br>± 2.7E+07                 | 1.64E+08<br>± 1.1E+07                 | 2.46E+08<br>± 5.0E+07                   | 2.87E+08 ±<br>1.7E+07                  | 1.75E+07<br>± 1.8E+06                 | 2.13E+07<br>± 1.6E+06                 | 2.62E+07<br>± 2.3E+06                   | 3.55E+07 ±<br>3.1E+06                  | -                         | -                                      |
| Dotriacontane                                                                                                                    | 3200.2 | 5.25E+06<br>± 8.8E+05                 | 3.33E+07<br>± 4.2E+06                 | 1.99E+07<br>± 4.9E+06                   | 4.66E+07 ±<br>8.6E+06                  | -                                     | -                                     | -                                       | -                                      | -                         | -                                      |
| 2-Methyldotriacontane                                                                                                            | 3260.1 | 2.64E+07<br>± 6.5E+06                 | 2.21E+07<br>± 5.7E+06                 | 3.65E+07<br>± 6.0E+06                   | 5.61E+07 ±<br>7.4E+06                  | -                                     | -                                     | -                                       | -                                      | -                         | -                                      |
| Tritriacontene                                                                                                                   | 3275.9 | 1.34E+08<br>± 1.9E+07                 | 1.08E+08<br>± 9.1E+06                 | 4.69E+08<br>± 1.1E+08                   | 5.74E+08 ±<br>6.3E+07                  | 1.63E+07<br>± 2.6E+06                 | 1.28E+07<br>± 1.2E+06                 | 3.21E+07<br>± 4.6E+06                   | 7.95E+07 ±<br>1.7E+07                  | -                         | -                                      |
| Tritriacontane                                                                                                                   | 3296.6 | 2.14E+07<br>± 6.6E+06                 | 1.67E+07<br>± 3.6E+06                 | 5.59E+07<br>± 1.4E+07                   | 7.40E+07 ±<br>9.3E+06                  | 7.42E+06<br>± 1.0E+06                 | 4.15E+06<br>± 3.5E+05                 | 7.10E+06<br>± 1.6E+06                   | 2.70E+07 ±<br>1.3E+07                  | -                         | -                                      |
| 7-, 9-, 11-, 13- and<br>15-<br>Methyltrtriacontanes <sup>A</sup><br>+ unknown compound <sup>B</sup>                              | 3329.3 | 8.33E+07<br>±<br>1.8E+07 <sup>A</sup> | 5.99E+07<br>±<br>8.5E+06 <sup>A</sup> | 2.34E+08<br>±<br>4.9E+07 <sup>A,B</sup> | 4.84E+08 ±<br>4.1E+07 <sup>A,B</sup>   | 1.18E+07<br>±<br>2.3E+06 <sup>A</sup> | 1.25E+07<br>±<br>1.1E+06 <sup>A</sup> | 3.01E+07<br>±<br>4.7E+06 <sup>A,B</sup> | -                                      | -                         | -                                      |
| 11,15-, 13,17-,<br>15,19-<br>Dimethyltrtriacontanes                                                                              | 3356.6 | 4.21E+07<br>± 1.2E+07                 | 2.85E+07<br>± 3.4E+06                 | -                                       | -                                      | -                                     | -                                     | -                                       | -                                      | -                         | -                                      |
| 3-Methyltrtriacontane                                                                                                            | 3365.7 | 1.67E+07<br>± 7.6E+06                 | 8.92E+06<br>± 2.1E+06                 | 5.52E+07<br>± 2.6E+07                   | -                                      | -                                     | -                                     | -                                       | -                                      | -                         | -                                      |
| Octadecyl<br>tetradecanoate                                                                                                      | 3376.7 | -                                     | -                                     | 2.15E+08<br>± 4.6E+07                   | 2.21E+09 ±<br>3.8E+08                  | -                                     | -                                     | 9.64E+07<br>± 1.1E+07                   | 3.71E+09 ±<br>7.4E+08                  | 6.10E+09                  | 1.16E+10 ±<br>8.2E+08                  |
| Pentatriacontene                                                                                                                 | 3477.6 | -                                     | -                                     | 2.66E+07<br>± 8.5E+06                   | 6.06E+07 ±<br>9.6E+06                  | -                                     | -                                     | -                                       | -                                      | -                         | -                                      |
| 11-, 13-, 15- and<br>17-<br>Methylpentatriacontanes                                                                              | 3533.6 | 2.05E+07<br>± 3.7E+06                 | 1.37E+07<br>± 1.9E+06                 | 4.79E+07<br>± 8.3E+06                   | -                                      | -                                     | -                                     | -                                       | -                                      | -                         | -                                      |
| Tetradecyl eicosanoate <sup>A</sup><br>+ Octadecyl<br>hexadecanoate <sup>B</sup><br>+ Eicosyl<br>tetradecanoate <sup>C</sup>     | 3565.0 | -                                     | -                                     | 1.43E+08<br>±<br>3.6E+07 <sup>A</sup>   | 9.31E+08 ±<br>1.5E+08 <sup>A,B,C</sup> | -                                     | -                                     | 7.59E+07<br>±<br>4.8E+06 <sup>A</sup>   | 9.31E+08 ±<br>1.5E+08 <sup>A,B,C</sup> | 2.27E+09 <sup>A,B,C</sup> | 4.93E+09 ±<br>5.5E+08 <sup>A,B,C</sup> |
| 11-, 13-<br>Methylheptatriacontanes                                                                                              | 3728.7 | 3.65E+07<br>± 5.7E+06                 | 2.48E+07<br>± 3.0E+06                 | 8.71E+07<br>± 1.9E+07                   | 2.21E+08 ±<br>4.0E+07                  | -                                     | -                                     | 8.71E+07<br>± 1.9E+07                   | -                                      | -                         | -                                      |
| Hexadecyl eicosanoate                                                                                                            | 3767.4 | -                                     | -                                     | -                                       | 5.05E+08 ±<br>8.2E+07                  | -                                     | -                                     | -                                       | 1.05E+09 ±<br>2.4E+08                  | 1.15E+09                  | 1.81E+09 ±<br>1.6E+08                  |

**Supplementary data 2. Compound table of housefly cuticular extracts.** Full table of tentatively identified compounds in cuticular hexane extracts. First column shows compound names. Second columns shows Kovats Retention index. The relative amount of each compound in each sample type is given in peak area abundance  $\pm$  Standard error of the mean. Parenthesis after each sample type is the number of samples. A compound had to appear in all 5 samples to be included. Unidentified compounds were not included.

### Supplementary data 3

| Compound name         | Kovats RI (DB-WAX column) | Uninfected females (5) | Uninfected males (5) | Sporulating females (5) | Sporulating males (5) | Conidia from females (3) | Conidia from males (2) |
|-----------------------|---------------------------|------------------------|----------------------|-------------------------|-----------------------|--------------------------|------------------------|
| Sesquiterpene 1       | 1393                      | -                      | -                    | 8.40E+06 ± 3.0E+06      | 8.56E+06 ± 3.1E+06    | -                        | -                      |
| Sesquiterpene 2       | 1399                      | -                      | -                    | 4.99E+06 ± 2.2E+05      | 5.50E+06 ± 7.2E+05    | -                        | -                      |
| Sesquiterpene 3       | 1415                      | 3.76E+06 ± 1.5E+06     | -                    | 1.46E+08 ± 6.2E+07      | 1.67E+08 ± 5.6E+07    | 6.75E+06 ± 1.3E06        | 5.73E+06               |
| Ethyl octanoate       | 1436                      | -                      | -                    | 2.81E+07 ± 2.0E+07      | 5.76E+06 ± 2.2E+06    | -                        | -                      |
| Sesquiterpene 4       | 1472                      | -                      | -                    | 1.31E+06 ± 6.0E+05      | 1.27E+06 ± 5.5E+05    | -                        | -                      |
| Sesquiterpene 5       | 1496                      | -                      | -                    | 1.31E+07 ± 4.0E+06      | 3.56E+07 ± 1.6E+07    | -                        | -                      |
| Sesquiterpene 6       | 1549                      | -                      | -                    | 1.89E+06 ± 8.1E+05      | 2.38E+06 ± 1.1E+06    | -                        | -                      |
| Sesquiterpene 7       | 1636                      | -                      | -                    | 4.44E+06 ± 1.7E+06      | 2.97E+06 ± 1.2E+06    | -                        | -                      |
| Sesquiterpene 8       | 1673                      | -                      | -                    | 3.55E+05 ± 5.0E+04      | 3.95E+05 ± 5.5E+04    | -                        | -                      |
| Unknown compound 1    | 1758                      | -                      | -                    | 5.04E+06 ± 3.4E+06      | 4.68E+06 ± 2.8E+06    | -                        | -                      |
| Unknown compound 2    | 1873                      | -                      | -                    | 1.44E+07 ± 6.9E+06      | 1.52E+07 ± 6.4E+06    | -                        | -                      |
| Unknown               | 1886                      | -                      | -                    | 1.79E+07 ± 4.0E+06      | 5.19E+07 ± 1.9E+07    | -                        | -                      |
| 1-Phenylethyl alcohol | 1922                      | -                      | 5.17E+06 ± 3.1E+06   | -                       | -                     | -                        | -                      |
| Unknown compound 3    | 1931                      | -                      | -                    | 4.73E+05 ± 7.0E+04      | 3.72E+06 ± 2.0E+06    | -                        | -                      |
| Unknown compound 4    | 1980                      | -                      | -                    | 5.38E+06 ± 2.6E+06      | 1.26E+06 ± 2.5E+05    | -                        | -                      |
| Unknown compound 5    | 1984                      | -                      | -                    | 1.85E+07 ± 9.5E+06      | 2.01E+07 ± 9.1E+06    | -                        | -                      |
| Unknown compound 6    | 2033                      | -                      | -                    | 2.55E+06 ± 1.4E+06      | 5.39E+05 ± 1.0E+05    | -                        | -                      |
| Unknown compound 7    | 2039                      | -                      | -                    | 6.69E+06 ± 3.0E+06      | 6.82E+06 ± 2.6E+06    | -                        | -                      |
| Unknown compound 8    | 2050                      | -                      | -                    | 8.79E+05 ± 3.2E+05      | 4.51E+05 ± 1.3E+05    | -                        | -                      |
| 1-Tetradecyl acetate  | 2094                      | -                      | -                    | 1.85E+07 ± 1.1E+07      | 3.68E+07 ± 1.9E+07    | 1.10E+07 ± 2.9E+06       | 1.52E+07               |
| 1-Tetradecanol        | 2168                      | 3.91E+06 ± 2.1E+06     | 2.53E+06 ± 1.3E+06   | 2.33E+07 ± 1.2E+07      | 2.49E+07 ± 1.2E+07    | 8.07E+06 ± 1.5+06        | 1.15E+07               |
| Unknown compound 9    | 2226                      | -                      | -                    | 3.90E+05 ± 3.0E+04      | 4.25E+05 ± 6.7E+04    | -                        | -                      |
| Diterpene 1           | 2286                      | -                      | -                    | 2.75E+06 ± 7.9E+05      | 2.66E+06 ± 8.6E+05    | -                        | -                      |
| 1-Hexadecyl acetate   | 2300                      | -                      | -                    | 9.10E+06 ± 6.3E+06      | 2.26E+06 ± 1.1E+06    | -                        | -                      |
| 1-Hexadecanol         | 2376                      | -                      | -                    | 3.79E+06 ± 1.8E+06      | 4.30E+06 ± 1.7E+06    | -                        | -                      |

**Supplementary data 3. Full table of tentatively identified compounds in headspace samples.** First column shows compound names. Second column shows Kovats Retention index. The relative amount of each compound in each sample type is given in peak area (TIC) ± Standard error of the mean. Parenthesis after each sample type is the number of samples. Compounds appearing in three out of five samples in a given treatment was included.



## Supplementary data 4

A

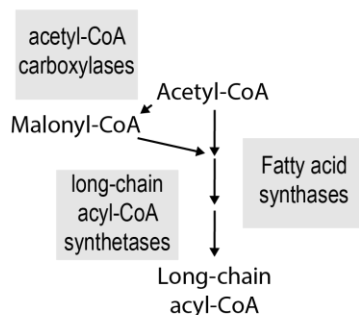

B

|                                | TranscriptID          | BLASTPtophit | %Identity | e-value   | Kegg              | EC                | log2FC | FDR_p  |
|--------------------------------|-----------------------|--------------|-----------|-----------|-------------------|-------------------|--------|--------|
| Acetyl-CoA carboxylase         | TRINITY_DN20838_c2_g2 | ACAC_SCHPO   | 39,3      | 8.14e-95  | K11262            | 6.4.1.2, 6.3.4.14 | 2,46   | 0,0000 |
|                                | TRINITY_DN9224_c0_g1  | ACAC_SCHPO   | 66,7      | 6.98e-19  | K11262            | 6.4.1.2, 6.3.4.14 | 4,19   | 0,0000 |
|                                | TRINITY_DN11999_c0_g1 | ACAC_SCHPO   | 37,7      | 2.04e-61  | K11262            | 6.4.1.2, 6.3.4.14 | 2,66   | 0,0000 |
|                                | TRINITY_DN8745_c0_g1  | ACAC_YEAST   | 70,3      | 1.59e-117 | K11262            | 6.4.1.2, 6.3.4.14 | 3,46   | 0,0001 |
|                                | TRINITY_DN1774_c0_g1  | ACAC_YEAST   | 44,0      | 5.42e-49  | K11262            | 6.4.1.2, 6.3.4.14 | 2,56   | 0,0002 |
|                                | TRINITY_DN6921_c0_g1  | ACAC_SCHPO   | 62,7      | 2.77e-41  | K11262            | 6.4.1.2, 6.3.4.14 | 4,06   | 0,0010 |
|                                | TRINITY_DN5496_c0_g1  | ACAC_YEAST   | 54,6      | 3.58e-62  | K11262            | 6.4.1.2, 6.3.4.14 | 3,76   | 0,0024 |
|                                | TRINITY_DN10159_c0_g1 | ACAC_SCHPO   | 58,6      | 3.63e-49  | K11262            | 6.4.1.2, 6.3.4.14 | 1,38   | 0,0035 |
|                                | TRINITY_DN20838_c1_g1 | ACAC_SCHPO   | 31,7      | 2.92e-15  | K11262            | 6.4.1.2, 6.3.4.14 | -0,76  | 0,0047 |
|                                | TRINITY_DN21736_c0_g1 | ACAC_SCHPO   | 62,1      | 3.35e-70  | K11262            | 6.4.1.2, 6.3.4.14 | 1,69   | 0,0059 |
|                                | TRINITY_DN1062_c0_g1  | ACAC_SCHPO   | 53,3      | 4.62e-40  | K11262            | 6.4.1.2, 6.3.4.14 | 1,50   | 0,0174 |
|                                | TRINITY_DN21389_c0_g1 | ACAC_SCHPO   | 24,1      | 2.56e-22  | K11262            | 6.4.1.2, 6.3.4.14 | 0,47   | 0,0195 |
|                                | TRINITY_DN20838_c2_g1 | ACAC_SCHPO   | 50,6      | 0         | K11262            | 6.4.1.2, 6.3.4.14 | 0,39   | 0,0568 |
|                                | TRINITY_DN2573_c0_g1  | ACAC_SCHPO   | 61,3      | 5.9e-28   | K11262            | 6.4.1.2, 6.3.4.14 | 1,78   | 0,0591 |
|                                | TRINITY_DN2535_c0_g1  | ACAC_YEAST   | 79,2      | 6.31e-64  | K11262            | 6.4.1.2, 6.3.4.14 | 2,31   | 0,0741 |
| TRINITY_DN5348_c0_g1           | ACAC_YEAST            | 75,4         | 5.07e-66  | K11262    | 6.4.1.2, 6.3.4.14 | 2,37              | 0,0925 |        |
| Fatty acid synthases FAS1/FAS2 | TRINITY_DN21615_c2_g1 | FAS2_PENPA   | 54,4      | 0         | K00667            | 2.3.1.86          | 2,45   | 0,0000 |
|                                | TRINITY_DN20289_c0_g1 | FAS2_EMEND   | 52,5      | 0         | K00667            | 2.3.1.86          | 3,43   | 0,0000 |
|                                | TRINITY_DN21615_c2_g3 | FAS2_YEAST   | 65,3      | 6.1e-36   | K00667            | 2.3.1.86          | 3,13   | 0,0000 |
|                                | TRINITY_DN16765_c0_g1 | FAS2_EMEND   | 64,4      | 1.62e-133 | K00667            | 2.3.1.86          | 2,25   | 0,0000 |
|                                | TRINITY_DN21615_c0_g1 | FAS2_LACKL   | 53,6      | 2.14e-35  | K00667            | 2.3.1.86          | 3,07   | 0,0014 |
|                                | TRINITY_DN7801_c0_g1  | FAS2_CANAX   | 81,0      | 1.63e-39  | K00667            | 2.3.1.86          | 1,59   | 0,0017 |
|                                | TRINITY_DN1128_c0_g1  | FAS2_PENPA   | 76,1      | 2.49e-32  | K00667            | 2.3.1.86          | 3,30   | 0,0154 |
|                                | TRINITY_DN2844_c0_g1  | FAS2_SCHPO   | 69,6      | 9.34e-32  | K00667            | 2.3.1.86          | 2,24   | 0,1581 |
|                                | TRINITY_DN21615_c2_g4 | FAS1_SCHPO   | 49,4      | 0         | K00668            | 2.3.1.86          | 3,33   | 0,0000 |
|                                | TRINITY_DN17570_c0_g1 | FAS1_SCHPO   | 58,1      | 9.62e-149 | K00668            | 2.3.1.86          | 3,99   | 0,0000 |
|                                | TRINITY_DN12197_c0_g1 | FAS1_YEAST   | 49,3      | 4.23e-83  | K00668            | 2.3.1.86          | 3,75   | 0,0000 |
|                                | TRINITY_DN17406_c0_g1 | FAS1_SCHPO   | 51,5      | 4.78e-115 | K00668            | 2.3.1.86          | 4,82   | 0,0000 |
|                                | TRINITY_DN15402_c0_g1 | FAS1_YARLI   | 39,8      | 1.57e-61  | K00668            | 2.3.1.86          | 4,65   | 0,0000 |
|                                | TRINITY_DN14812_c0_g1 | FAS1_CANAX   | 36,2      | 1.26e-37  | K00668            | 2.3.1.86          | 3,98   | 0,0002 |
|                                | TRINITY_DN3608_c0_g1  | FAS1_YEAST   | 50,7      | 3.45e-20  | K00668            | 2.3.1.86          | 2,57   | 0,0831 |
| TRINITY_DN5417_c0_g1           | FAS1_SCHPO            | 63,6         | 4.8e-37   | K00668    | 2.3.1.86          | 2,93              | 0,1534 |        |
| long-chain acyl-CoA synthetase | TRINITY_DN17778_c0_g2 | LCF2_YEAST   | 31,1      | 3.06e-49  | K01897            | 6.2.1.3           | 1,49   | 0,0000 |
|                                | TRINITY_DN25342_c0_g1 | LCF2_SCHPO   | 34,8      | 1.13e-136 | K01897            | 6.2.1.3           | 1,70   | 0,0000 |
|                                | TRINITY_DN19153_c0_g2 | LCF2_SCHPO   | 38,3      | 4.99e-164 | K01897            | 6.2.1.3           | 0,87   | 0,0000 |
|                                | TRINITY_DN17671_c0_g1 | LCF2_YEAST   | 25,7      | 1.99e-43  | K01897            | 6.2.1.3           | 0,54   | 0,0000 |
|                                | TRINITY_DN17778_c0_g1 | LCF2_YEAST   | 35,6      | 2.46e-39  | K01897            | 6.2.1.3           | -0,50  | 0,0002 |
|                                | TRINITY_DN19147_c0_g1 | LCF2_YEAST   | 35,6      | 3.89e-110 | K01897            | 6.2.1.3           | -0,28  | 0,0004 |
|                                | TRINITY_DN20446_c3_g2 | LCF2_SCHPO   | 33,3      | 1.76e-121 | K01897            | 6.2.1.3           | 4,30   | 0,0008 |
|                                | TRINITY_DN21065_c0_g2 | LCF2_YEAST   | 31,4      | 3.05e-95  | K01897            | 6.2.1.3           | 0,61   | 0,0047 |
|                                | TRINITY_DN20446_c3_g1 | LCF1_YEAST   | 37,1      | 6,00E-106 | K01897            | 6.2.1.3           | 4,21   | 0,2630 |
|                                | TRINITY_DN19131_c0_g1 | LCF2_YEAST   | 33,4      | 5.81e-88  | K01897            | 6.2.1.3           | -0,12  | 0,5653 |

**Supplementary data 4. Fatty acid gene expression in *E. muscae*.** A. Schematic drawing of the general fatty-acid synthesis pathway in fungi. B. Expressed *E. muscae* transcripts annotated as either Acetyl-CoA carboxylase, Fatty acid synthases, or long-chain acyl-CoA synthetase enzymes. Fungal transcripts written in bold are significantly higher expressed in late-stage sporulating cadavers vs. early-stage sporulating cadavers.

## Supplementary data 5

A

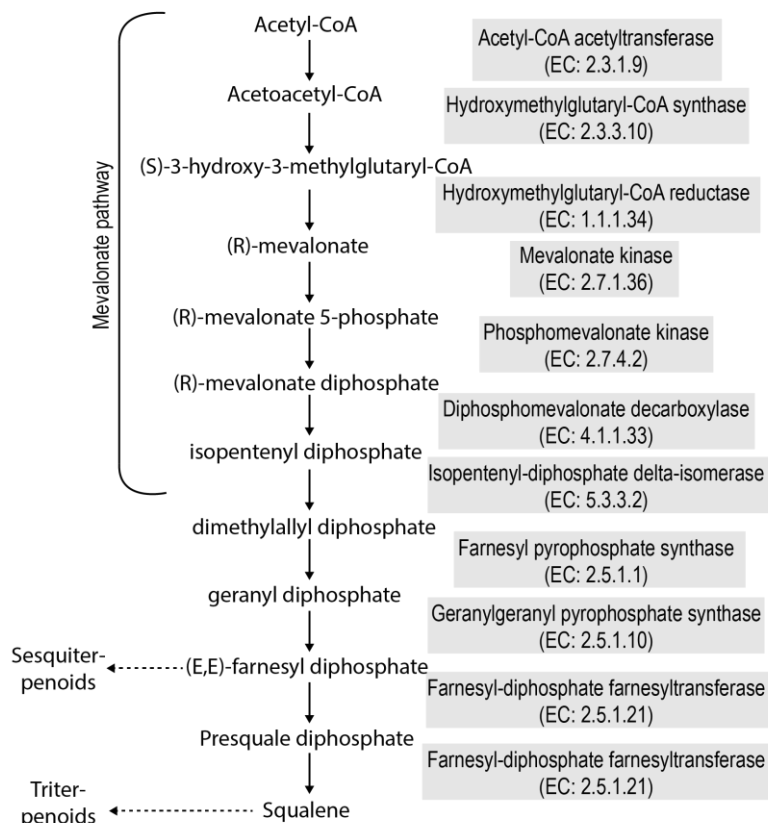

B

| TranscriptID          | BLASTPtophit | %Identity | e-value   | Name                                                                                            | Kegg   | EC                                | log2FC | FDR_p  |
|-----------------------|--------------|-----------|-----------|-------------------------------------------------------------------------------------------------|--------|-----------------------------------|--------|--------|
| TRINITY_DN14635_c0_g1 | THIL_SCHPO   | 61,3      | 6.31e-82  | Acetyl-CoA acetyltransferase                                                                    | K00626 | 2.3.1.9                           | 0,86   | 0,0031 |
| TRINITY_DN2357_c0_g2  | THIL_YARLI   | 52,1      | 4.89e-123 | Acetyl-CoA acetyltransferase                                                                    | K00626 | 2.3.1.9                           | -0,10  | 0,6482 |
| TRINITY_DN18770_c0_g1 | THIL_YARLI   | 40,7      | 1.47e-73  | Acetyl-CoA acetyltransferase                                                                    | K00626 | 2.3.1.9                           | -0,37  | 0,0500 |
| TRINITY_DN14635_c0_g2 | THIA_CANTR   | 55,5      | 3.63e-67  | Acetyl-CoA acetyltransferase                                                                    | K00626 | 2.3.1.9                           | -0,62  | 0,0312 |
| TRINITY_DN2357_c0_g1  | THIL_YARLI   | 50,6      | 1.08e-119 | Acetyl-CoA acetyltransferase                                                                    | K00626 | 2.3.1.9                           | -1,63  | 0,0000 |
| TRINITY_DN17308_c1_g1 | HMCS_YEAST   | 51,4      | 4.33e-154 | Hydroxymethylglutaryl-CoA synthase                                                              | K01641 | 2.3.3.10                          | 0,41   | 0,0000 |
| TRINITY_DN20557_c0_g1 | HMDH2_YEAST  | 44,1      | 0         | 3-hydroxy-3-methylglutaryl-coenzyme A reductase 2 (hydroxymethylglutaryl-CoA reductase (NADPH)) | K00021 | 1.1.1.34                          | 0,50   | 0,0001 |
| TRINITY_DN18020_c0_g1 | KIME_SCHPO   | 33,2      | 2.17e-36  | Putative mevalonate kinase                                                                      | K00869 | 2.7.1.36                          | -0,50  | 0,0004 |
| TRINITY_DN15321_c0_g1 | ERG8_SCHPO   | 33,2      | 1.96e-50  | Probable phosphomevalonate kinase                                                               | K00938 | 2.7.4.2                           | 0,57   | 0,0000 |
| TRINITY_DN27786_c0_g1 | MVD_GANLU    | 56,8      | 9.41e-139 | Diphosphomevalonate decarboxylase                                                               | K01597 | 4.1.1.33                          | -0,04  | 0,7858 |
| TRINITY_DN17598_c0_g1 | IDI1_SCHPO   | 58,7      | 7.94e-87  | Isopentenyl-diphosphate Delta-isomerase                                                         | K01823 | 5.3.3.2                           | 0,02   | 0,9016 |
| TRINITY_DN16421_c0_g1 | FPPS_KLULA   | 55,5      | 1.78e-140 | Farnesyl pyrophosphate synthase                                                                 | K00787 | 2.5.1.1,<br>2.5.1.10              | 0,24   | 0,0926 |
| TRINITY_DN18257_c1_g1 | GGPPS_MUCCL  | 52,7      | 7.51e-108 | Geranylgeranyl pyrophosphate synthase                                                           | K00804 | 2.5.1.1,<br>2.5.1.10,<br>2.5.1.29 | 0,16   | 0,1063 |
| TRINITY_DN14336_c0_g1 | GGPPS_MUCCL  | 64,2      | 5.27e-42  | Geranylgeranyl pyrophosphate synthase                                                           | K00804 | 2.5.1.1,<br>2.5.1.10,<br>2.5.1.29 | 0,01   | 0,9633 |
| TRINITY_DN16883_c0_g1 | FDFT_SCHPO   | 52,1      | 5.65e-123 | Farnesyl-diphosphate farnesyltransferase                                                        | K00801 | 2.5.1.21                          | -0,46  | 0,6100 |

**Supplementary data 5. Mevalonate and terpenoid synthesis gene expression in *E. muscae*.** A. Schematic drawing of the general terpenoid synthesis pathway in fungi. B. Expressed *E. muscae* transcripts annotated as enzymes in the general terpenoid synthesis pathway in fungi. Annotation, blastp results, and expression in late stage sporulating cadavers vs. early stage cadavers are given.

## Supplementary data 6

A

| TranscriptID                | BLASTPtophit      | Query/Hit_coverage         | %Identity     | e-value         | Name                     | Kegg          | EC         | log2FC      | FDR_p         |
|-----------------------------|-------------------|----------------------------|---------------|-----------------|--------------------------|---------------|------------|-------------|---------------|
| TRINITY_DN19029_c0_g1       | PANB_EMENI        | Q:736-1566,H:62-340        | 51,613        | 3.02e-84        | 3-methyl-2-oxobutanoate  | K00606        | 2.1.1.2.11 | -0,38       | 0,0617        |
| <b>TRINITY_DN8643_c0_g1</b> | <b>YM60_YEAST</b> | <b>Q:925-362,H:207-397</b> | <b>27,586</b> | <b>1.36e-16</b> | <b>Putative esterase</b> | <b>K07019</b> | -          | <b>2,96</b> | <b>0,0000</b> |
| TRINITY_DN19826_c0_g1       | YM60_YEAST        | Q:1519-410,H:8-413         | 29,71         | 2.82e-52        | Putative esterase        | K07019        | -          | 0,42        | 0,0007        |
| TRINITY_DN18612_c0_g1       | YM60_YEAST        | Q:314-1420,H:33-413        | 29,095        | 1.32e-42        | Putative esterase        | K07019        | -          | 0,21        | 0,2334        |

B

| Query = <i>S. cerevisiae eeb1</i> (GU471249.1) |              |          |
|------------------------------------------------|--------------|----------|
| TranscriptID                                   | Score (bits) | e-value  |
| TRINITY_DN18612_c0_g1                          | 102,0        | 2,00E-38 |
| TRINITY_DN19826_c0_g1                          | 91,8         | 1,00E-33 |
| TRINITY_DN8643_c0_g1                           | 46,4         | 9,00E-12 |

| Query = <i>S. cerevisiae mgl2</i> (YMR210W) |              |          |
|---------------------------------------------|--------------|----------|
| TranscriptID                                | Score (bits) | e-value  |
| TRINITY_DN19826_c0_g1                       | 106,0        | 3,00E-46 |
| TRINITY_DN18612_c0_g1                       | 105,0        | 3,00E-40 |
| TRINITY_DN8643_c0_g1                        | 52,4         | 2,00E-13 |

| Query = <i>S. cerevisiae eht1</i> (AB012577.1) |              |          |
|------------------------------------------------|--------------|----------|
| TranscriptID                                   | Score (bits) | e-value  |
| TRINITY_DN19826_c0_g1                          | 96,4         | 3,00E-30 |
| TRINITY_DN18612_c0_g1                          | 97,3         | 6,00E-29 |
| TRINITY_DN19029_c0_g1                          | 88,1         | 3,00E-17 |
| TRINITY_DN8643_c0_g1                           | 49,6         | 5,00E-07 |

**Supplementary data 6. Expressed *E. muscae* transcripts with homology to ethyl ester biosynthesis genes.** A. Four *E. muscae* transcripts with homology the yeast *Saccharomyces cerevisiae* ethyl ester biosynthesis genes *eht1* and *eeb1* specifically involved in ethyl octanoate biosynthesis. Results of Blastp searches and expression in late-stage sporulating cadavers vs. early-stage sporulating cadavers are shown. **A.** Results of Blastp searches with the yeast ethyl ester biosynthesis genes *eht1*, *eeb1*, and *mgl2* against the *E. muscae* translated transcripts

### Supplementary data 7

| Late sporulation vs. Late control                                                                               | RefSeq Acc.    | log2FC | padj        |
|-----------------------------------------------------------------------------------------------------------------|----------------|--------|-------------|
| Musca domestica cytochrome P450 4g1-like (LOC101887882), mRNA                                                   | NM_001286897.1 | -12,16 | 1,89259E-22 |
| PREDICTED: Musca domestica fatty acid synthase (LOC101893120), mRNA                                             | XM_005175727.3 | -11,28 | 3,58E-12    |
| PREDICTED: Musca domestica putative fatty acyl-CoA reductase CG8306 (LOC101894220), mRNA                        | XM_005186257.3 | -10,17 | 1,79111E-08 |
| PREDICTED: Musca domestica apolipoporphins (LOC101887937), mRNA                                                 | XM_005177378.3 | -10,13 | 5,80409E-17 |
| PREDICTED: stearoyl-CoA desaturase 5 [Musca domestica]                                                          | XM_020035426.1 | -9,27  | 6,09374E-20 |
| PREDICTED: Musca domestica putative fatty acyl-CoA reductase CG8306 (LOC101894391), mRNA                        | XM_011295377.2 | -9,11  | 2,84943E-06 |
| PREDICTED: Musca domestica putative fatty acyl-CoA reductase CG5065 (LOC101891740), mRNA                        | XM_005176936.3 | -7,91  | 8,26901E-23 |
| PREDICTED: Musca domestica putative fatty acyl-CoA reductase CG5065 (LOC101895795), transcript variant X1, mRNA | XM_005188297.3 | -7,90  | 0,00013416  |
| PREDICTED: acetyl-CoA carboxylase isoform X4 [Musca domestica]                                                  | XM_011293554.2 | -7,86  | 2,16833E-05 |
| PREDICTED: Musca domestica putative fatty acyl-CoA reductase CG5065 (LOC101895795), transcript variant X2, mRNA | XM_011296188.2 | -7,77  | 0,000253628 |
| PREDICTED: Musca domestica putative fatty acyl-CoA reductase CG5065 (LOC101895795), transcript variant X3, mRNA | XM_020038489.1 | -6,56  | 0,0269019   |
| PREDICTED: acyl-CoA Delta(11) desaturase isoform X2 [Musca domestica]                                           | XM_011295002.2 | -5,92  | 0,03097972  |
| PREDICTED: stearoyl-CoA desaturase 5 [Musca domestica]                                                          | XM_005179649.3 | -5,91  | 1,74128E-07 |
| PREDICTED: acetyl-CoA carboxylase isoform X5 [Musca domestica]                                                  | XM_020036198.1 | -5,02  | 0,156581617 |
| PREDICTED: Musca domestica fatty acyl-CoA reductase wat (LOC101900313), mRNA                                    | XM_005180061.3 | -4,39  | 0,005026714 |
| PREDICTED: acyl-CoA Delta(11) desaturase [Musca domestica]                                                      | XM_005185154.3 | -4,19  | 4,06585E-07 |
| PREDICTED: acyl-CoA Delta(11) desaturase isoform X1 [Musca domestica]                                           | XM_020037419.1 | -4,11  | 0,001316354 |
| PREDICTED: Musca domestica cytochrome P450 4g1 (LOC101887550), mRNA                                             | XM_005176292.3 | -3,86  | 0,040126949 |
| PREDICTED: Musca domestica putative fatty acyl-CoA reductase CG8306 (LOC101895407), mRNA                        | XM_005175978.3 | -3,71  | 8,97821E-05 |
| PREDICTED: Musca domestica cytochrome P450 4g1-like (LOC101888923), mRNA                                        | XM_005176300.3 | -3,57  | 0,47584952  |
| PREDICTED: acetyl-CoA carboxylase isoform X1 [Musca domestica]                                                  | XM_005181944.3 | -3,43  | 0,161531896 |
| PREDICTED: Musca domestica putative fatty acyl-CoA reductase CG5065 (LOC101900725), mRNA                        | XM_005182153.3 | -2,99  | 0,061633958 |
| PREDICTED: Musca domestica putative fatty acyl-CoA reductase CG5065 (LOC101900725), mRNA                        | XM_005182153.3 | -2,99  | 0,061633958 |
| PREDICTED: Musca domestica fatty acyl-CoA reductase wat (LOC101898308), mRNA                                    | XM_005180049.3 | -2,97  | 2,07232E-06 |
| PREDICTED: Musca domestica fatty acyl-CoA reductase wat (LOC101890000), mRNA                                    | XM_005188530.2 | -2,77  | 0,407822353 |
| PREDICTED: Musca domestica fatty acyl-CoA reductase wat (LOC101890887), mRNA                                    | XM_005183981.3 | -2,52  | 0,047549704 |
| PREDICTED: Musca domestica fatty acyl-CoA reductase wat (LOC101896175), mRNA                                    | XM_005184011.3 | -2,42  | 6,67739E-06 |
| PREDICTED: Musca domestica putative fatty acyl-CoA reductase CG5065 (LOC101889437), mRNA                        | XM_005189195.3 | -1,93  | 0,108928013 |
| PREDICTED: Musca domestica fatty acid synthase (LOC101888614), mRNA                                             | XM_020038884.1 | -1,80  | 0,000896846 |
| PREDICTED: Musca domestica putative fatty acyl-CoA reductase CG5065 (LOC101895587), transcript variant X1, mRNA | XM_005175979.3 | -1,75  | 0,210803962 |
| PREDICTED: Musca domestica fatty acyl-CoA reductase wat (LOC101889946), mRNA                                    | XM_005189198.3 | -1,40  | 0,000416809 |
| PREDICTED: Musca domestica fatty acyl-CoA reductase wat (LOC101898132), mRNA                                    | XM_005180048.3 | -1,39  | 0,014521176 |

|                                                                                                                 |                |       |             |
|-----------------------------------------------------------------------------------------------------------------|----------------|-------|-------------|
| PREDICTED: Musca domestica putative fatty acyl-CoA reductase CG8306 (LOC101900903), transcript variant X2, mRNA | XM_011293655.2 | -1,32 | 0,602050254 |
| PREDICTED: Musca domestica putative fatty acyl-CoA reductase CG8306 (LOC101889237), mRNA                        | XM_005182172.3 | -1,19 | 0,442596133 |
| PREDICTED: Musca domestica putative fatty acyl-CoA reductase CG5065 (LOC101895795), transcript variant X4, mRNA | XM_011296189.2 | -1,03 | 0,545062285 |
| PREDICTED: acetyl-CoA carboxylase isoform X3 [Musca domestica]                                                  | XM_011293553.2 | -0,96 | 0,046922987 |
| PREDICTED: Musca domestica cytochrome P450 4g1 (LOC101889105), mRNA                                             | XM_005176301.3 | -0,93 | 0,298771972 |
| PREDICTED: Musca domestica putative fatty acyl-CoA reductase CG5065 (LOC101900323), mRNA                        | XM_011293999.2 | -0,91 | 0,539496046 |
| PREDICTED: Musca domestica putative fatty acyl-CoA reductase CG8306 (LOC101892601), mRNA                        | XM_005176941.3 | -0,27 | 0,366099761 |
| PREDICTED: Musca domestica putative fatty acyl-CoA reductase CG8306 (LOC101892601), mRNA                        | XM_005176941.3 | -0,27 | 0,366099761 |
| PREDICTED: acyl-CoA Delta(11) desaturase [Musca domestica]                                                      | XM_005185155.3 | 0,12  | 0,792109614 |
| PREDICTED: acyl-CoA Delta(11) desaturase [Musca domestica]                                                      | XM_020037334.1 | 0,14  | 0,792109614 |
| PREDICTED: Musca domestica farnesyl pyrophosphate synthase (LOC101895546), mRNA                                 | XM_005182378.3 | 0,36  | 0,107435616 |
| PREDICTED: acetyl-CoA carboxylase isoform X2 [Musca domestica]                                                  | XM_020036197.1 | 0,46  | 0,556112607 |

| <b>Early sporulation vs. Early control</b>                                                                      | <b>RefSeq Acc.</b> | <b>log2FC</b> | <b>padj</b> |
|-----------------------------------------------------------------------------------------------------------------|--------------------|---------------|-------------|
| PREDICTED: Musca domestica apolipoporphins (LOC101887937), mRNA                                                 | XM_005177378.3     | -8,75         | 9,31909E-12 |
| Musca domestica cytochrome P450 4g1-like (LOC101887882), mRNA                                                   | NM_001286897.1     | -8,49         | 8,14829E-11 |
| PREDICTED: Musca domestica putative fatty acyl-CoA reductase CG8306 (LOC101894220), mRNA                        | XM_005186257.3     | -7,20         | 0,00027315  |
| PREDICTED: Musca domestica putative fatty acyl-CoA reductase CG5065 (LOC101895795), transcript variant X2, mRNA | XM_011296188.2     | -6,98         | 0,002849196 |
| PREDICTED: Musca domestica putative fatty acyl-CoA reductase CG8306 (LOC101894391), mRNA                        | XM_011295377.2     | -6,79         | 0,001633083 |
| PREDICTED: Musca domestica fatty acyl-CoA reductase wat (LOC101900313), mRNA                                    | XM_005180061.3     | -6,71         | 2,42625E-05 |
| PREDICTED: acyl-CoA Delta(11) desaturase isoform X2 [Musca domestica]                                           | XM_011295002.2     | -6,41         | 0,041009908 |
| PREDICTED: Musca domestica putative fatty acyl-CoA reductase CG5065 (LOC101891740), mRNA                        | XM_005176936.3     | -5,56         | 3,50215E-16 |
| PREDICTED: Musca domestica putative fatty acyl-CoA reductase CG8306 (LOC101895407), mRNA                        | XM_005175978.3     | -4,96         | 2,37481E-07 |
| PREDICTED: stearoyl-CoA desaturase 5 [Musca domestica]                                                          | XM_020035426.1     | -3,73         | 1,53157E-09 |
| PREDICTED: Musca domestica putative fatty acyl-CoA reductase CG8306 (LOC101900903), transcript variant X2, mRNA | XM_011293655.2     | -3,36         | 0,217299133 |
| PREDICTED: Musca domestica fatty acyl-CoA reductase wat (LOC101890000), mRNA                                    | XM_005188530.2     | -3,30         | 0,445818878 |
| PREDICTED: acetyl-CoA carboxylase isoform X5 [Musca domestica]                                                  | XM_020036198.1     | -3,23         | 0,511742809 |
| PREDICTED: stearoyl-CoA desaturase 5 [Musca domestica]                                                          | XM_005179649.3     | -3,22         | 0,006325195 |
| PREDICTED: acyl-CoA Delta(11) desaturase isoform X1 [Musca domestica]                                           | XM_020037419.1     | -3,18         | 0,015854541 |
| PREDICTED: acyl-CoA Delta(11) desaturase [Musca domestica]                                                      | XM_005185154.3     | -2,89         | 0,001904492 |
| PREDICTED: Musca domestica putative fatty acyl-CoA reductase CG8306 (LOC101889237), mRNA                        | XM_005182172.3     | -2,64         | 0,112915655 |
| PREDICTED: Musca domestica fatty acyl-CoA reductase wat (LOC101898308), mRNA                                    | XM_005180049.3     | -1,91         | 0,003587708 |
| PREDICTED: Musca domestica fatty acyl-CoA reductase wat (LOC101896175), mRNA                                    | XM_005184011.3     | -1,72         | 0,003019074 |
| PREDICTED: Musca domestica fatty acyl-CoA reductase wat (LOC101890887), mRNA                                    | XM_005183981.3     | -1,68         | 0,331271747 |



|                                                                                                                 |                |       |             |
|-----------------------------------------------------------------------------------------------------------------|----------------|-------|-------------|
| PREDICTED: Musca domestica cytochrome P450 4g1 (LOC101887550), mRNA                                             | XM_005176292.3 | -1,64 | 0,558297926 |
| PREDICTED: acetyl-CoA carboxylase isoform X4 [Musca domestica]                                                  | XM_011293554.2 | -1,41 | 0,554000921 |
| PREDICTED: acetyl-CoA carboxylase isoform X1 [Musca domestica]                                                  | XM_005181944.3 | -1,38 | 0,708316717 |
| PREDICTED: Musca domestica putative fatty acyl-CoA reductase CG5065 (LOC101900725), mRNA                        | XM_005182153.3 | -1,37 | 0,543449079 |
| PREDICTED: Musca domestica putative fatty acyl-CoA reductase CG5065 (LOC101900725), mRNA                        | XM_005182153.3 | -1,37 | 0,543449079 |
| PREDICTED: Musca domestica putative fatty acyl-CoA reductase CG8306 (LOC101892601), mRNA                        | XM_005176941.3 | -1,22 | 2,26354E-05 |
| PREDICTED: Musca domestica putative fatty acyl-CoA reductase CG8306 (LOC101892601), mRNA                        | XM_005176941.3 | -1,22 | 2,26354E-05 |
| PREDICTED: Musca domestica fatty acid synthase (LOC101888614), mRNA                                             | XM_020038884.1 | -1,10 | 0,09881781  |
| PREDICTED: Musca domestica cytochrome P450 4g1 (LOC101889105), mRNA                                             | XM_005176301.3 | -0,99 | 0,397097265 |
| PREDICTED: Musca domestica putative fatty acyl-CoA reductase CG5065 (LOC101895587), transcript variant X1, mRNA | XM_005175979.3 | -0,95 | 0,610179693 |
| PREDICTED: Musca domestica putative fatty acyl-CoA reductase CG5065 (LOC101895795), transcript variant X1, mRNA | XM_005188297.3 | -0,74 | 0,818216359 |
| PREDICTED: acyl-CoA Delta(11) desaturase [Musca domestica]                                                      | XM_020037334.1 | -0,74 | 0,223020832 |
| PREDICTED: Musca domestica putative fatty acyl-CoA reductase CG5065 (LOC101889437), mRNA                        | XM_005189195.3 | -0,42 | 0,8363287   |
| PREDICTED: acyl-CoA Delta(11) desaturase [Musca domestica]                                                      | XM_005185155.3 | -0,31 | 0,604796698 |
| PREDICTED: Musca domestica fatty acyl-CoA reductase wat (LOC101898132), mRNA                                    | XM_005180048.3 | -0,23 | 0,806483462 |
| PREDICTED: acetyl-CoA carboxylase isoform X2 [Musca domestica]                                                  | XM_020036197.1 | -0,20 | 0,876850597 |
| PREDICTED: Musca domestica fatty acyl-CoA reductase wat (LOC101889946), mRNA                                    | XM_005189198.3 | -0,04 | 0,960622847 |
| PREDICTED: Musca domestica cytochrome P450 4g1-like (LOC101888923), mRNA                                        | XM_005176300.3 | 0,00  | 1           |
| PREDICTED: Musca domestica farnesyl pyrophosphate synthase (LOC101895546), mRNA                                 | XM_005182378.3 | 0,03  | 0,948399537 |
| PREDICTED: acetyl-CoA carboxylase isoform X3 [Musca domestica]                                                  | XM_011293553.2 | 0,06  | 0,952812318 |
| PREDICTED: Musca domestica putative fatty acyl-CoA reductase CG5065 (LOC101895795), transcript variant X3, mRNA | XM_020038489.1 | 0,10  | 0,99267009  |
| PREDICTED: Musca domestica putative fatty acyl-CoA reductase CG5065 (LOC101895795), transcript variant X4, mRNA | XM_011296189.2 | 0,38  | 0,893147991 |
| PREDICTED: Musca domestica fatty acid synthase (LOC101893120), mRNA                                             | XM_005175727.3 | 0,41  | 0,886139873 |
| PREDICTED: Musca domestica putative fatty acyl-CoA reductase CG5065 (LOC101900323), mRNA                        | XM_011293999.2 | 0,64  | 0,772041035 |

**Supplementary data 7. Housefly gene expression of selected cuticular hydrocarbon biosynthesis related genes.** Tables are sorted by log<sub>2</sub> Fold Change. Top table: Late *E. muscae* sporulating female house flies compared to late uninfected control female house flies. Bottom table: Early sporulation *E. muscae* female house flies compared to early uninfected control female house flies.

### **Supplementary video 1**

[https://sid.erda.dk/share\\_redirect/hIekF7iOhD](https://sid.erda.dk/share_redirect/hIekF7iOhD)

Timelapse video of sporulating female house fly. The video spans 24 hours.

To view video: Follow the link. This will download the videofile.

This file can be played with a media player (tested with VLC media player & Windows media player).

### **Supplementary video 2**

[https://sid.erda.dk/share\\_redirect/bJf0Bner0Q](https://sid.erda.dk/share_redirect/bJf0Bner0Q)

Video of escaped house flies feeding off conidia on a petri dish lid and bottom. The conidia can be seen as a white powder-like substance in the top of the lid.

To view video: Follow the link. This will download the videofile.

This file can be played with a media player (tested with VLC media player & Windows media player).
